# Supplementary material for: The Isopeptidase USP2a Protects Human Prostate Cancer from Apoptosis
Source: Oxford University Press journal article supplement (doi:10.1158/0008-5472.can-06-1374), 2006-09-01
Supplement: 00085472can061374-sup-supplementary_table_1.xls [file 00085472can061374-sup-supplementary_table_1.xls]

## Sheet: CAN-06-1374v2_Sup_1
41bbPathway	BioCarta	1377_at	34021_at	2070_i_at	1538_s_at	35000_at	36645_at	40702_at	1378_g_at	AFFX-MurIL4_at	32583_at	33981_at	33009_at	1045_s_at	1461_at	2004_at	31540_at	34226_at	1295_at	1671_s_at	1327_s_at	1021_at	1611_s_at	37575_at	37733_at	1994_at	1574_s_at	33784_at	33770_at	38438_at	34006_s_at	1271_g_at	2071_s_at	38902_r_at	35960_at
ace2Pathway	BioCarta	36659_at	33563_s_at	32667_at	33562_g_at	33561_at	684_at	35493_at	39939_at	779_at	37983_at	346_s_at	33496_at	39655_at	33024_at	39333_at
achPathway	BioCarta	1564_at	2009_at	34740_at	1861_at	1424_s_at	1869_at	36117_at	1851_s_at	35027_at	33804_at	38904_at	35373_at	34653_at	1269_at	1858_at	1938_at	40704_at	31777_at
actinYPathway	BioCarta	35734_at	35810_at	135_g_at	38815_at	34691_f_at	321_at	134_at	33357_at	38758_at	38445_at	41795_at	35126_at	34692_r_at	35271_at	36805_s_at	2050_s_at	31737_at	1040_s_at	37190_at	35724_at	39043_at	1718_at	39875_at	35733_at	40154_at	33449_at	40864_at	989_at	1058_at
agpcrPathway	BioCarta	37221_at	116_at	37450_r_at	39662_s_at	33341_at	1091_at	227_g_at	1336_s_at	160029_at	36359_at	37448_s_at	38905_at	37449_i_at	41768_at	1217_g_at	1437_at	36772_at	31604_at	37301_at	226_at	32304_at	40566_at	36215_at
ahspPathway	BioCarta	36653_g_at	32052_at	37285_at	36652_at	33914_r_at	37674_at	36787_at	31687_f_at	37649_at	34506_at	37667_at	37999_at
akap13Pathway	BioCarta	37221_at	116_at	37769_at	36359_at	38905_at	1394_at	40387_at	34346_at	36215_at	34106_at	37309_at
akap96Pathway	BioCarta	37221_at	116_at	1803_at	237_s_at	35314_at	36359_at	33181_at	38905_at	33324_s_at	40915_r_at	34647_at	1945_at	32157_at	34346_at	36215_at	35138_at	34736_at
akapCentrosomePathway	BioCarta	37221_at	417_at	116_at	36506_at	183_at	1803_at	220_r_at	237_s_at	36359_at	32097_at	32891_at	33181_at	38905_at	219_i_at	35422_at	33324_s_at	40915_r_at	1394_at	32157_at	34346_at	36215_at	1972_s_at	175_s_at	37309_at
aktPathway	BioCarta	1377_at	1861_at	1424_s_at	32316_s_at	237_s_at	36645_at	1378_g_at	36238_at	160030_at	486_at	35373_at	32029_at	1045_s_at	1332_f_at	1461_at	40704_at	1564_at	34740_at	1295_at	487_g_at	1851_s_at	40570_at	33181_at	33770_at	38438_at	1271_g_at	1269_at	1858_at
alkPathway	BioCarta	1831_at	31348_at	38515_at	36422_s_at	1253_at	34639_at	1114_at	38300_at	37710_at	1262_s_at	34241_at	39764_at	36905_at	40367_at	1815_g_at	1735_g_at	40777_at	37575_at	1767_s_at	36182_at	1897_at	510_g_at	35433_s_at	38902_r_at	971_s_at	39565_at	36953_at	33570_at	1952_s_at	37712_g_at	41445_at	40333_at	1013_at	1912_s_at	1814_at	1830_s_at	1325_at	1955_s_at	37280_at	34640_at	39215_at	1853_at	32903_at	37711_at	40231_at	1957_s_at	40449_at	163_at
amiPathway	BioCarta	856_at	37450_r_at	33341_at	33238_at	40518_at	39226_at	227_g_at	40520_g_at	40519_at	35517_at	37448_s_at	41768_at	36772_at	37078_at	35580_at	31604_at	36215_at	432_s_at	2059_s_at	37221_at	116_at	1498_at	33353_at	38319_at	1091_at	36359_at	31710_at	37039_at	38905_at	37449_i_at	1768_s_at	226_at	36277_at	33831_at
arapPathway	BioCarta	934_at	34919_at	33987_at	39224_at	1293_s_at	39410_at	35363_at	38666_at	39307_s_at	40123_at	39905_i_at	34485_r_at	39080_at	32523_at	37387_r_at	31996_at	31995_g_at	37386_i_at	32522_f_at	39906_r_at	33402_at	38306_at	31994_at	38741_at	38305_at	34206_at	39308_r_at	36962_at	34484_at	38657_s_at	33017_at
arenrf2Pathway	BioCarta	36711_at	2070_i_at	1671_s_at	2094_s_at	877_at	1336_s_at	32583_at	160029_at	37733_at	976_s_at	40954_at	1916_s_at	1217_g_at	1437_at	35322_at	1915_s_at	34006_s_at	37301_at	2071_s_at	37535_at	32304_at	40566_at	853_at	33014_at
arfPathway	BioCarta	1635_at	2050_s_at	1880_at	1570_f_at	40328_at	1656_s_at	2044_s_at	1973_s_at	1827_s_at	39730_at	2041_i_at	1859_s_at	1974_s_at	2008_s_at	1322_at	1713_s_at	2040_s_at	40560_at	2028_s_at	36460_at	1636_g_at	37724_at	35373_at	1571_f_at	1672_f_at	1269_at	40864_at	40704_at	38509_at	1900_at
argininecPathway	BioCarta	40042_r_at	37331_g_at	34719_at	36636_at	37332_r_at	34109_at	37330_at	37341_at	1962_at	34110_g_at
asbcellPathway	BioCarta	37643_at	856_at	1808_s_at	32861_s_at	34021_at	37644_s_at	AFFX-MurFAS_at	35150_at	1538_s_at	33945_at	AFFX-MurIL10_at	1851_s_at	1440_s_at	AFFX-MurIL4_at	33981_at	35517_at	1441_s_at	1574_s_at	37039_at	35149_at	35015_at	389_s_at	1858_at
at1rPathway	BioCarta	2009_at	41747_s_at	32519_at	1565_s_at	2070_i_at	1158_s_at	1336_s_at	32583_at	38580_at	37710_at	41143_at	1781_at	1558_g_at	346_s_at	2004_at	41287_s_at	35701_at	1130_at	1131_at	1844_s_at	684_at	160029_at	37575_at	38904_at	976_s_at	37327_at	1537_at	41288_at	1712_s_at	34006_s_at	38581_at	32304_at	38902_r_at	38742_s_at	33855_at	37712_g_at	38118_at	1590_s_at	41144_g_at	1000_at	36117_at	40075_at	911_s_at	35434_at	33260_at	33009_at	1917_at	2050_s_at
atmPathway	BioCarta	32869_at	1635_at	1377_at	1863_s_at	2070_i_at	1656_s_at	35227_at	38920_at	39730_at	1859_s_at	36645_at	1378_g_at	32583_at	32870_g_at	35153_at	2001_g_at	39941_at	39233_at	604_at	1636_g_at	1045_s_at	1461_at	33724_at	1993_s_at	1872_at	37887_at	1880_at	1295_at	2041_i_at	1974_s_at	2008_s_at	2031_s_at	2040_s_at	38438_at	2000_at	34006_s_at	1271_g_at	1911_s_at	2071_s_at	38509_at	1533_at
atrbrcaPathway	BioCarta	32118_at	32869_at	1989_at	1863_s_at	38920_at	32870_g_at	35153_at	1324_at	1990_g_at	2001_g_at	39941_at	39233_at	604_at	160034_s_at	33724_at	32158_at	35713_at	1993_s_at	37229_at	36857_at	38153_at	1872_at	37887_at	37584_at	33145_at	1974_s_at	2000_at	34689_at	1533_at
badPathway	BioCarta	34718_at	2060_at	1861_at	2066_at	1424_s_at	37493_at	227_g_at	1335_at	41768_at	1847_s_at	35580_at	35373_at	2067_f_at	34742_at	40704_at	36215_at	1975_s_at	1615_at	1263_at	37221_at	1564_at	116_at	1998_i_at	597_at	1501_at	33353_at	1997_s_at	1091_at	31335_at	37494_at	36359_at	38905_at	1086_at	1910_s_at	1888_s_at	1909_at	1269_at	2065_s_at	226_at	38737_at	2038_g_at
bbcellPathway	BioCarta	37643_at	856_at	1808_s_at	32861_s_at	37644_s_at	AFFX-MurFAS_at	35150_at	33945_at	1851_s_at	1440_s_at	35517_at	1441_s_at	37039_at	35149_at	389_s_at	1858_at
bcl2family_and_reg_network	GEArray	37227_at	33146_at	2060_at	1861_at	33775_s_at	2066_at	2011_s_at	36211_at	35905_s_at	39482_at	32789_at	33323_r_at	32318_s_at	AFFX-HUMGAPDH/M33197_M_at	31491_s_at	2023_g_at	AFFX-HUMGAPDH/M33197_5_at	AFFX-HSAC07/X00351_5_st	1847_s_at	AFFX-HSAC07/X00351_3_st	2067_f_at	33322_i_at	34742_at	40972_at	AFFX-HSAC07/X00351_M_st	1975_s_at	AFFX-HUMGAPDH/M33197_5_st	1615_at	AFFX-HUMGAPDH/M33197_M_st	1263_at	1564_at	AFFX-HSAC07/X00351_M_at	33774_at	1998_i_at	979_g_at	1501_at	277_at	41306_at	2002_s_at	1687_s_at	1997_s_at	34798_at	AFFX-HSAC07/X00351_5_at	32725_at	AFFX-HUMGAPDH/M33197_3_at	AFFX-HUMGAPDH/M33197_3_st	1910_s_at	32726_g_at
bcrPathway	BioCarta	250_at	39780_at	1565_s_at	2070_i_at	249_at	548_s_at	1158_s_at	39144_at	1336_s_at	32583_at	37988_at	41143_at	1781_at	2004_at	41287_s_at	40822_at	39143_at	35701_at	38277_at	1130_at	1844_s_at	37370_i_at	32540_at	160029_at	37733_at	1919_at	41288_at	34006_s_at	38242_at	38017_at	38018_g_at	32304_at	38742_s_at	33855_at	38118_at	34481_at	1590_s_at	1082_at	41144_g_at	40823_s_at	1000_at	40075_at	36885_at	37369_s_at	911_s_at	34351_at	1915_s_at	33260_at
biopeptidesPathway	BioCarta	32859_at	2009_at	32519_at	1565_s_at	2070_i_at	33341_at	310_s_at	1158_s_at	40458_at	1336_s_at	40479_at	38629_at	2039_s_at	41143_at	36772_at	506_s_at	564_at	32105_f_at	41287_s_at	40481_r_at	37468_at	35701_at	39388_at	1130_at	1131_at	1844_s_at	684_at	160029_at	37733_at	976_s_at	41288_at	32860_g_at	114_r_at	33338_at	34006_s_at	34846_at	32304_at	39708_at	113_i_at	31813_at	38742_s_at	33855_at	38118_at	1590_s_at	1082_at	41144_g_at	1000_at	41476_at
blymphocytePathway	BioCarta	38547_at	34665_g_at	36874_at	35150_at	34664_at	32640_at	40518_at	40520_g_at	40519_at	35892_at	37918_at	37039_at	35149_at	35015_at	35894_at	34663_at
breast_cancer_estrogen_signalling	GEArray	36100_at	33848_r_at	2060_at	AFFX-MurFAS_at	41266_at	39482_at	32318_s_at	32583_at	32043_at	1442_at	32782_r_at	40304_at	AFFX-HSAC07/X00351_5_st	AFFX-HSAC07/X00351_3_st	2021_s_at	863_g_at	862_at	AFFX-HUMGAPDH/M33197_M_st	38722_at	33669_at	40899_at	32736_at	32372_at	34798_at	115_at	37575_at	38784_g_at	37327_at	1537_at	867_s_at	1578_g_at	1888_s_at	38418_at	38902_r_at	31798_at	1741_s_at	36174_at	41066_at	31616_r_at	34431_at	41351_at	AFFX-HUMGAPDH/M33197_M_at	1702_at	32271_at	1673_at	160025_at	35249_at	41216_r_at
6329_at	37310_at	659_g_at	2034_s_at	2036_s_at	1083_s_at	2020_at	33410_at	AFFX-HSAC07/X00351_M_st	32737_at	AFFX-HUMGAPDH/M33197_5_st	40697_at	1808_s_at	38783_at	790_at	160032_at	1346_at	40511_at	41215_s_at	1851_s_at	37951_at	38785_at	32781_f_at	2031_s_at	39830_at	2017_s_at	38299_at	31615_i_at	40777_at	1713_s_at	1619_g_at	1577_at	38039_at	1521_at	41060_at	AFFX-HUMGAPDH/M33197_3_st	103_at	41350_at	389_s_at	1802_s_at	1001_at	977_s_at	2038_g_at	AFFX-HSAC07/X00351_3_at	34531_at	37643_at	904_s_at	37450_r_at	37644_s_at	1861_at
/M33197_3_at	32612_at	1910_s_at	33411_g_at	37926_at	33847_s_at	32329_at	1858_at	39552_at
ca_nf_at_signalling	GEArray	36100_at	2060_at	41747_s_at	34607_at	249_at	32222_at	31365_f_at	33945_at	768_at	1253_at	39482_at	40702_at	32318_s_at	33323_r_at	40519_at	40421_at	AFFX-HSAC07/X00351_5_st	41143_at	33514_at	AFFX-HSAC07/X00351_3_st	1558_g_at	1045_s_at	34241_at	551_at	AFFX-HUMGAPDH/M33197_M_st	1295_at	36906_at	38864_at	37370_i_at	1421_at	1704_at	545_g_at	32540_at	37733_at	41288_at	32843_s_at	355_s_at	34724_at	1426_at	34846_at	1400_at	259_s_at	1156_at	33003_at	41065_at	33896_at	1590_s_at	40823_s_at
3_at	AFFX-MurIL10_at	40513_at	39144_at	1158_s_at	40520_g_at	594_s_at	33002_at	1353_g_at	34023_at	40258_at	34725_at	410_s_at	AFFX-HSAC07/X00351_M_st	41287_s_at	AFFX-HUMGAPDH/M33197_5_st	40822_at	1263_at	39143_at	38354_at	35701_at	38277_at	38431_at	40511_at	1851_s_at	1611_s_at	2031_s_at	38299_at	1427_g_at	1214_s_at	1666_at	1919_at	31364_i_at	33784_at	36806_at	AFFX-HUMGAPDH/M33197_3_st	35372_r_at	33653_at	34006_s_at	33831_at	2038_g_at	AFFX-HSAC07/X00351_3_at	632_at	34021_at	34481_at	1422_g_at	1861_at	41144_g_at	1538_s_at	41445_at
6277_at	37652_at	34847_s_at	40362_at	37645_at
cacamPathway	BioCarta	31813_at	1422_g_at	41144_g_at	251_at	877_at	40075_at	1158_s_at	911_s_at	41143_at	33514_at	37535_at	32105_f_at	41287_s_at	32104_i_at	39388_at	40294_at	650_s_at	1421_at	41288_at	32863_at	38716_at	34846_at	34847_s_at
calcineurinPathway	BioCarta	250_at	39780_at	1082_at	249_at	41144_g_at	40823_s_at	40075_at	1158_s_at	39144_at	1336_s_at	37369_s_at	41573_at	38580_at	911_s_at	34351_at	41143_at	281_s_at	41287_s_at	40822_at	39143_at	38277_at	37370_i_at	32434_at	37368_at	32540_at	2031_s_at	160029_at	32541_at	41288_at	1217_g_at	1437_at	37301_at	38581_at	32304_at	40566_at	1156_at
cardiacegfPathway	BioCarta	1377_at	1590_s_at	1082_at	38770_at	36645_at	1336_s_at	1378_g_at	32583_at	1198_at	34351_at	1915_s_at	37724_at	33496_at	1045_s_at	1295_at	35701_at	1973_s_at	1827_s_at	38769_at	2094_s_at	1507_s_at	684_at	160029_at	1916_s_at	37327_at	1537_at	38438_at	1217_g_at	1437_at	1394_at	1271_g_at	37301_at	1542_at	32304_at	40566_at	37309_at
carm1Pathway	BioCarta	37221_at	116_at	33896_at	877_at	1091_at	227_g_at	36359_at	32800_at	1337_s_at	38905_at	41768_at	40183_at	40182_s_at	33381_at	226_at	405_at	37535_at	33831_at	36215_at	551_at
carm-erPathway	BioCarta	39359_s_at	32455_s_at	39887_at	37712_g_at	33896_at	32064_at	32172_at	1681_at	37710_at	604_at	40183_at	39970_at	38271_at	37364_at	33724_at	35495_at	38810_at	2020_at	551_at	35821_at	1993_s_at	33669_at	37711_at	40791_at	1885_at	40088_at	39358_at	31709_at	2017_s_at	34368_at	37882_at	41441_at	476_s_at	39886_at	40182_s_at	35795_at	38418_at	33831_at	36826_at	38771_at
caspase_activity	BioCarta	35662_at	195_s_at	1765_at	38281_at	39320_at	196_s_at	1326_at	36143_at	1766_g_at	39999_at	574_s_at
caspasePathway	BioCarta	41146_at	37227_at	36578_at	37378_r_at	1717_s_at	33775_s_at	1766_g_at	37377_i_at	31491_s_at	574_s_at	1239_s_at	32047_at	486_at	1240_at	39999_at	35662_at	34449_at	195_s_at	33774_at	1984_s_at	487_g_at	1287_at	37137_at	37985_at	36987_at	1765_at	38281_at	39320_at	1326_at	34448_s_at	36143_at	34937_at	32904_at	35818_at
cblPathway	BioCarta	33855_at	1565_s_at	1731_at	39691_at	1987_at	34416_at	1968_g_at	1336_s_at	160029_at	38904_at	35684_at	1988_at	37327_at	1537_at	1217_g_at	36157_at	1437_at	160022_at	37301_at	1542_at	32304_at	40566_at	1938_at
ccr3Pathway	BioCarta	38742_s_at	37450_r_at	1590_s_at	33341_at	32972_at	32973_s_at	1000_at	39222_at	36117_at	33659_at	1336_s_at	38580_at	35980_at	37448_s_at	36772_at	31604_at	40008_at	41137_at	1917_at	35701_at	1130_at	38743_f_at	1844_s_at	34925_at	160029_at	1015_s_at	35335_at	976_s_at	33098_at	37449_i_at	1217_g_at	1437_at	1394_at	37301_at	38581_at	32304_at	40566_at	36640_at	37309_at
ccr5Pathway	BioCarta	2009_at	2070_i_at	1082_at	41144_g_at	40075_at	1158_s_at	1336_s_at	32583_at	36674_at	38580_at	32666_at	911_s_at	34351_at	1915_s_at	41143_at	34375_at	41287_s_at	1671_s_at	2094_s_at	33804_at	160029_at	37733_at	1916_s_at	41288_at	649_s_at	1217_g_at	1437_at	874_at	34006_s_at	37301_at	38581_at	2071_s_at	875_g_at	32304_at	33834_at	40566_at
cd40Pathway	BioCarta	34344_at	1377_at	36004_at	1209_at	1295_at	35150_at	33945_at	1005_at	974_at	36645_at	1378_g_at	37057_s_at	33770_at	38438_at	35149_at	595_at	1271_g_at	33009_at	1045_s_at	1461_at	2004_at	35960_at
cdc25Pathway	BioCarta	1863_s_at	1424_s_at	38920_at	1803_at	2033_s_at	32189_g_at	32188_at	1738_at	1347_at	2001_g_at	2000_at	33324_s_at	36909_at	35407_at	1584_at	40915_r_at	32187_at
cdc42racPathway	BioCarta	2050_s_at	35734_at	39736_at	35810_at	1731_at	38815_at	1987_at	34691_f_at	1968_g_at	321_at	39043_at	38758_at	39875_at	1718_at	1988_at	38445_at	35733_at	36157_at	34692_r_at	40154_at	1557_at	35271_at	35373_at	1394_at	1558_g_at	1269_at	40864_at	40704_at	37309_at	40192_at
cdk5Pathway	BioCarta	38742_s_at	38726_at	32519_at	38725_s_at	789_at	35701_at	1590_s_at	790_at	1130_at	1131_at	1000_at	791_g_at	38743_f_at	1844_s_at	217_at	40549_at	976_s_at	1673_at	1206_at	41721_at	800_g_at	36273_at	799_at	1917_at
cdmacPathway	BioCarta	38742_s_at	1377_at	1590_s_at	1000_at	36645_at	1378_g_at	1336_s_at	32583_at	35980_at	1915_s_at	37724_at	1045_s_at	1461_at	1917_at	1295_at	35701_at	1130_at	1973_s_at	1827_s_at	2094_s_at	38743_f_at	1844_s_at	1852_at	160029_at	976_s_at	1916_s_at	38438_at	1217_g_at	1437_at	1271_g_at	37301_at	32304_at	40566_at	259_s_at
cell_adhesion	GO	40843_at	32375_at	32666_at	32599_at	38534_at	36643_at	33169_at	245_at	32832_at	36698_at	36416_g_at	36276_at	41481_at	31853_at	38636_at	31967_at	1111_at	36061_at	36414_s_at	39302_at	32818_at	35433_s_at	31673_s_at	40094_r_at	32964_at	36062_at	31809_at	34238_at	36802_at	38522_s_at	37286_at	39511_at	34914_at	31682_s_at	35625_at	39066_at	36644_at	34375_at	2061_at	1483_at	482_at	37092_at	34775_at	35608_at	742_at	40646_at	34633_s_at	36043_at
551_at	40234_at	40093_at	1296_at	40736_at	33575_at	41289_at	37287_at	797_at	40990_at	33303_at	33834_at	41661_at	41415_at	40643_at	33158_at	37744_r_at	39991_at	39790_at	39069_at	39757_at	32424_at	38501_s_at	35146_at	33302_at	41475_at	38111_at	38547_at	32644_at	188_at	1020_s_at	35246_at	1508_at	32701_at	36182_at	36415_at	33098_at	38533_s_at	2019_s_at	36976_at	31920_at	32268_at	38521_at	32269_at	1319_at	33063_at	1195_s_at	41105_s_at	2047_s_at	32181_at
t	31719_at	33823_at	35372_r_at	1978_at	35101_at	36699_at	35897_r_at	875_g_at	41660_at	32948_at	34429_at	35497_at	34021_at	1538_s_at	40443_at	37289_at	35769_at	1425_at	38112_g_at	36656_at	36284_at	2053_at	37284_at	36674_at	1912_s_at	37918_at	1403_s_at	39946_at	39791_at	2076_s_at	33543_s_at	32826_at	36709_at	1404_r_at	607_s_at	38644_at	2050_s_at	37095_r_at	41093_at	39119_s_at	874_at	34403_at	765_s_at	40864_at	40738_at	41409_at	40144_at	39753_at
cell_adhesion_molecule_activity	GO	31716_at	37760_at	34986_at	40668_s_at	41138_at	37019_at	39991_at	37398_at	32375_at	944_s_at	36082_at	33169_at	245_at	32832_at	38453_at	41475_at	36276_at	37875_at	1020_s_at	35246_at	1111_at	38825_at	115_at	39302_at	867_s_at	36797_at	31673_s_at	41781_at	40094_r_at	31809_at	39361_f_at	31487_at	38004_at	38521_at	34238_at	36802_at	38522_s_at	37286_at	39402_at	32181_at	36367_at	36644_at	40452_at	39362_r_at	2054_g_at	482_at	2073_s_at	590_at
3_at	31719_at	35101_at	103_at	36699_at	41211_at	39706_at	34781_at	977_s_at	34193_at	31810_g_at	34619_at	40366_at	1425_at	36656_at	32417_at	35740_at	36284_at	2053_at	36622_at	41782_g_at	39946_at	160031_at	38454_g_at	33543_s_at	32826_at	607_s_at	38058_at	38059_g_at	36796_at	38551_at	35078_at	37562_at	40234_at	1296_at	40093_at	41093_at	402_s_at	41289_at	33575_at	39119_s_at	40667_at	37287_at	797_at	34403_at	40738_at	110_at	36334_at	38524_at	41780_at
cell_adhesion_receptor_activity	GO	34429_at	40843_at	40643_at	33082_at	41266_at	40366_at	36892_at	889_at	1372_at	1195_s_at	35731_at	2032_s_at	37918_at	39071_at	38534_at	40681_at	35948_at	36709_at	32808_at	257_at	2061_at	33410_at	38547_at	38746_at	39754_at	1140_at	41481_at	885_g_at	1508_at	37952_at	36989_at	881_at	852_at	40644_g_at	2055_s_at	884_at	41005_at	406_at	32818_at	2058_s_at	33411_g_at	1978_at	38533_s_at	2019_s_at	39753_at
Cell_Cycle	GO	35546_at	33848_r_at	38920_at	36086_at	2033_s_at	1253_at	2068_s_at	1433_g_at	41632_at	39943_at	2001_g_at	33252_at	1207_at	40412_at	1824_s_at	2021_s_at	1571_f_at	38944_at	38810_at	35821_at	34736_at	1880_at	981_at	1536_at	1670_at	38706_at	1983_at	1322_at	34368_at	1792_g_at	476_s_at	510_g_at	34783_s_at	39449_at	38155_at	1672_f_at	38771_at	1635_at	32849_at	480_at	36953_at	39730_at	1859_s_at	40117_at	37238_s_at	1347_at	35249_at	33324_s_at
t	1863_s_at	1570_f_at	2044_s_at	41445_at	947_at	1830_s_at	1943_at	1636_g_at	40915_r_at	32263_at	38271_at	1945_at	1720_at	37228_at	41545_at	2012_s_at	40129_at	1454_at	36650_at	2041_i_at	1974_s_at	1250_at	2008_s_at	509_at	2040_s_at	1703_g_at	2000_at	35407_at	33847_s_at	35312_at	1911_s_at	1044_s_at
cell_cycle_arrest	GO	41839_at	33848_r_at	1607_at	32036_i_at	38673_s_at	36944_f_at	37894_at	2014_s_at	38123_at	33640_at	36238_at	33641_g_at	983_at	1787_at	39724_s_at	41162_at	37011_at	33387_at	39545_at	2034_s_at	37724_at	39346_at	1599_at	1543_at	41497_at	34624_at	984_g_at	1973_s_at	1827_s_at	1012_at	39723_at	661_at	32037_r_at	2031_s_at	1713_s_at	36053_at	40908_r_at	41785_at	41110_at	1797_at	33847_s_at	37702_at	36943_r_at	37028_at	1911_s_at	33969_at
cell_cycle_checkpoint	GO	32118_at	32869_at	1635_at	1863_s_at	1656_s_at	1719_at	38920_at	39730_at	35905_s_at	39482_at	40117_at	AFFX-HUMGAPDH/M33197_M_at	947_at	32603_at	32870_g_at	35153_at	1324_at	AFFX-HUMGAPDH/M33197_5_at	39941_at	2001_g_at	39233_at	604_at	1636_g_at	651_at	1119_at	33724_at	32158_at	1720_at	AFFX-HUMGAPDH/M33197_5_st	38914_at	AFFX-HUMGAPDH/M33197_M_st	1993_s_at	38153_at	1872_at	37887_at	981_at	38481_at	2041_i_at	1034_at	1974_s_at	2040_s_at	37282_at	AFFX-HUMGAPDH/M33197_3_at	AFFX-HUMGAPDH/M33197_3_st	2000_at	1035_g_at	1721_g_at	652_g_at
cell_cycle_checkpointII	GO	37229_at	37723_at	1570_f_at	2044_s_at	37584_at	35227_at	1273_r_at	1974_s_at	1913_at	1713_s_at	35153_at	1274_s_at	35249_at	1571_f_at	1672_f_at	1900_at
cell_cycle_regulator	GO	33797_at	33848_r_at	2060_at	36634_at	2033_s_at	37632_s_at	31864_at	32530_at	40549_at	282_at	40707_at	40708_at	1206_at	2034_s_at	409_at	1207_at	1847_s_at	36909_at	800_g_at	36273_at	36839_at	1031_at	1969_s_at	33317_at	1535_at	41545_at	37294_at	41000_at	1536_at	2031_s_at	35969_at	39752_at	505_at	37458_at	1910_s_at	35970_g_at	33847_s_at	982_at	1909_at	799_at	2038_g_at	41546_at
cell_death	GO	37762_at	41136_s_at	41742_s_at	32399_at	32688_at	32686_at	39631_at	41743_i_at	1321_s_at	40268_at	41744_at	1359_at	33473_at	36780_at	35316_at	39182_at	41785_at	39616_at	32687_s_at
cell_growth_and_or_maintenance	GO	41146_at	1236_s_at	40312_at	1782_s_at	32960_at	830_at	32399_at	1572_s_at	38420_at	739_at	37639_at	37663_at	41563_at	37310_at	36469_at	37194_at	477_at	36471_f_at	33862_at	2006_at	377_g_at	41564_at	1071_at	37461_at	36466_at	33162_at	160032_at	41500_at	31779_s_at	40203_at	37664_at	1802_s_at	37829_at	36465_at	1257_s_at	376_at	37279_at	34106_at	31798_at	36638_at	38289_r_at	38140_at	2005_s_at	961_at	1732_at	41525_at	41499_at	940_g_at
cell_motility	GO	31394_at	33092_at	33158_at	1032_at	36930_at	37398_at	34691_f_at	40702_at	32318_s_at	38604_at	38758_at	1194_g_at	41700_at	34692_r_at	AFFX-HSAC07/X00351_5_st	33169_at	245_at	35676_at	37526_at	AFFX-HSAC07/X00351_3_st	38976_at	38434_at	772_at	863_g_at	862_at	431_at	38547_at	38219_at	35041_at	1130_at	33524_at	115_at	35301_at	39043_at	37733_at	1718_at	867_s_at	38392_at	40154_at	39624_at	39361_f_at	664_at	1590_s_at	38004_at	36493_at	34258_at	40771_at	35625_at
_s_at	37190_at	36443_at	32642_at	1611_s_at	1961_f_at	34077_at	35063_at	1405_i_at	33814_at	39875_at	31719_at	40976_at	576_at	35372_r_at	103_at	34006_s_at	41123_s_at	36919_r_at	37455_at	38977_at	39708_at	AFFX-HSAC07/X00351_3_at	36638_at	35497_at	35734_at	35810_at	1004_at	289_at	1193_at	321_at	36674_at	1403_s_at	38445_at	1317_at	35271_at	1404_r_at	34681_at	41124_r_at	38644_at	39105_at	36992_at	2050_s_at	AFFX-HSAC07/X00351_M_at	1671_s_at	37095_r_at	41205_at	32445_at	32434_at	AFFX-HSAC07/X00351_5_at
cell_proliferation	GO	32088_at	35000_at	33323_r_at	40749_at	1976_s_at	1262_s_at	33300_at	235_at	34898_at	1207_at	1249_at	37724_at	32979_at	800_g_at	40591_at	40076_at	33299_at	39061_at	32748_at	38115_at	40690_at	32452_at	41213_at	34004_at	39272_g_at	33012_at	38772_at	1670_at	1987_at	35220_at	1322_at	35923_at	33864_at	1537_at	36157_at	1652_at	40705_at	39449_at	33111_at	38804_at	2083_at	39661_s_at	39035_at	37762_at	37406_at	38742_s_at	32861_s_at	31549_at
13_at	836_at	35687_at	36449_s_at	36273_at	1263_at	38488_s_at	37757_at	38214_at	36264_at	39817_s_at	1827_s_at	41515_at	560_s_at	39787_at	35684_at	1988_at	35597_at	41547_at	37168_at	1802_s_at	1036_at	38888_at	35873_at	33301_g_at	41081_at	32036_i_at	39553_at	40405_at	32238_at	39818_at	35103_i_at	36837_at	1206_at	1467_at	32027_at	35311_at	1917_at	37228_at	31540_at	36992_at	33317_at	40856_at	224_at	37989_at	1507_s_at	33304_at	1434_at	32833_at	35104_r_at
25_at	32982_at	563_at	37750_at	39036_g_at	1385_at	479_at	37731_at	291_s_at	39109_at	36252_at	1321_s_at	39271_at	36450_at	1968_g_at	1095_s_at	1941_at	39100_at	41110_at	1884_s_at	40176_at	1942_s_at	38612_at	31621_s_at	35703_at	1633_g_at	33218_at	387_at	1033_g_at	36508_at	37209_g_at	870_f_at	459_s_at	40320_at	914_g_at	37208_at	1340_s_at	40590_at	34829_at	38475_at	1969_s_at	34228_r_at	1242_at	882_at	160032_at	1346_at	597_at	39631_at	37294_at	33932_at
cell_surface_receptor_linked_signal_transduction	GO	36578_at	39424_at	1032_at	35661_g_at	40100_at	37816_at	40101_g_at	31905_at	815_at	32653_at	37180_at	40702_at	37844_at	40519_at	32043_at	36789_f_at	32446_at	1334_s_at	31448_s_at	37799_at	1648_at	431_at	35927_r_at	255_s_at	34152_at	36661_s_at	35042_at	34004_at	33460_at	39277_at	1987_at	34798_at	35923_at	37733_at	34267_r_at	31760_at	36157_at	35797_at	35589_at	33111_at	38398_at	32451_at	36227_at	278_at	2083_at	38017_at	1400_at	37279_at
78_s_at	1085_s_at	39221_at	1095_s_at	36809_at	150_at	1588_at	39310_at	1331_s_at	40566_at	35703_at	34946_at	1731_at	1033_g_at	32270_g_at	1786_at	34033_s_at	41189_at	40520_g_at	34892_at	1353_g_at	610_at	35868_at	1340_s_at	39994_at	1210_s_at	33093_at	40648_at	32655_s_at	35590_s_at	38517_at	35660_at	35449_at	40099_at	36476_at	39665_at	35701_at	160032_at	816_g_at	39309_at	684_at	37148_at	1611_s_at	38299_at	41354_at	34975_at	32367_at	1988_at	1214_s_at	39351_at
cell2cellPathway	BioCarta	41153_f_at	41154_r_at	41155_at	36117_at	34499_at	37398_at	208_at	2085_s_at	41156_g_at	40777_at	36601_at	38904_at	31841_at	37397_at	1768_s_at	39329_at	1938_at	39330_s_at	2069_s_at	38448_at
cellcyclePathway	BioCarta	33848_r_at	1570_f_at	1607_at	2044_s_at	36086_at	1833_at	1907_at	2034_s_at	33324_s_at	1207_at	40915_r_at	2021_s_at	1571_f_at	1945_at	2020_at	1969_s_at	34736_at	37757_at	33317_at	41497_at	34624_at	41545_at	36650_at	1803_at	1795_g_at	1670_at	1914_at	2031_s_at	1983_at	2017_s_at	1322_at	1713_s_at	36053_at	1738_at	1792_g_at	2028_s_at	1924_at	41060_at	35407_at	1794_at	1797_at	33847_s_at	1942_s_at	1672_f_at	38418_at	1900_at	41546_at
ceramidePathway	BioCarta	38742_s_at	1377_at	2060_at	2070_i_at	32212_at	1861_at	2066_at	33775_s_at	1000_at	38755_at	36645_at	1378_g_at	31491_s_at	33166_at	1563_s_at	1847_s_at	2067_f_at	33009_at	1045_s_at	2004_at	37673_at	1729_at	1917_at	1845_at	33774_at	1295_at	40696_at	1998_i_at	1130_at	38743_f_at	1844_s_at	1997_s_at	976_s_at	36910_at	32574_at	33784_at	1712_s_at	38438_at	1910_s_at	34006_s_at	1271_g_at	1909_at	2071_s_at	2065_s_at	475_at	35818_at	2038_g_at
cftrPathway	BioCarta	37221_at	116_at	36816_s_at	37450_r_at	33353_at	1091_at	32174_at	227_g_at	36359_at	610_at	37448_s_at	38905_at	37449_i_at	41768_at	35580_at	31604_at	226_at	36215_at	40103_at
chemicalPathway	BioCarta	37227_at	41146_at	32859_at	2060_at	1863_s_at	1861_at	2066_at	36117_at	1336_s_at	2001_g_at	1847_s_at	486_at	2067_f_at	34742_at	32166_at	1615_at	39784_at	35662_at	1564_at	33339_g_at	1998_i_at	487_g_at	1974_s_at	1287_at	1997_s_at	1154_at	32725_at	160029_at	32860_g_at	38281_at	33338_at	1217_g_at	1910_s_at	1437_at	2000_at	32726_g_at	36143_at	1909_at	37301_at	2065_s_at	32304_at	40566_at	35818_at	2038_g_at
chrebpPathway	BioCarta	36705_at	37450_r_at	33341_at	237_s_at	227_g_at	41015_at	37448_s_at	41768_at	36772_at	35580_at	31604_at	34346_at	36215_at	37221_at	116_at	33353_at	1091_at	186_at	34050_at	36359_at	33181_at	38905_at	37449_i_at	226_at	35348_at
ck1Pathway	BioCarta	37221_at	116_at	33510_s_at	493_at	237_s_at	1091_at	227_g_at	36359_at	40549_at	36949_at	35980_at	33181_at	38905_at	41768_at	1206_at	34550_at	31468_f_at	800_g_at	36273_at	33509_at	799_at	226_at	281_s_at	32157_at	36215_at	40371_at
classicPathway	BioCarta	40496_at	40766_at	41701_at	37816_at	41023_at	39409_at	33374_at	37394_at	38796_at	35526_at
Complement_Activation_Classical	GO	40496_at	39695_at	40766_at	37816_at	33374_at	37394_at	38796_at	35526_at	36304_at	33401_at	41701_at	41023_at
compPathway	BioCarta	32946_r_at	40496_at	32945_i_at	40766_at	37816_at	39409_at	33374_at	37394_at	37514_s_at	38796_at	40283_at	35526_at	33401_at	41701_at	41023_at	40282_s_at	35822_at	37515_at
CR_ANGIOG	PNAS_2001	36100_at	1545_g_at	1964_g_at	37268_at	990_at	403_s_at	37398_at	115_at	1953_at	32562_at	991_g_at	37397_at	867_s_at	1926_at	37573_at	36101_s_at	35897_r_at	1963_at	690_s_at	1567_at	1954_at
CR_CAM	PNAS_2002	31394_at	39632_at	31716_at	32152_at	41138_at	37398_at	32782_r_at	32666_at	38534_at	41700_at	40304_at	36082_at	33169_at	245_at	38453_at	32462_s_at	863_g_at	862_at	38547_at	1140_at	41481_at	37875_at	38557_at	33103_s_at	1508_at	40687_at	897_at	1111_at	34722_at	34735_at	32818_at	552_at	1375_s_at	38533_s_at	2019_s_at	37196_at	36976_at	38181_at	31809_at	553_g_at	31859_at	39700_at	31616_r_at	36117_at	2047_s_at	32890_at	35625_at	32808_at
39875_at	33750_at	852_at	38127_at	884_at	31719_at	35372_r_at	1978_at	37484_at	977_s_at	31810_g_at	32463_at	40366_at	37889_at	889_at	32417_at	321_at	120_at	35731_at	2053_at	37284_at	31472_s_at	37918_at	160031_at	38454_g_at	36709_at	38428_at	257_at	2050_s_at	37562_at	37890_at	1296_at	40493_at	40736_at	402_s_at	41289_at	2055_s_at	32266_at	2058_s_at	1035_g_at	797_at	40864_at	33834_at	41415_at	39753_at
CR_CELL_CYCLE	PNAS_2004	33848_r_at	572_at	38920_at	31894_at	36086_at	2068_s_at	633_s_at	37854_at	1207_at	37724_at	2021_s_at	1571_f_at	40591_at	654_at	40192_at	34736_at	41694_at	422_s_at	40690_at	1880_at	37347_at	1536_at	1189_at	1983_at	1322_at	1792_g_at	34783_s_at	39449_at	37829_at	1672_f_at	38418_at	1607_at	579_at	36634_at	1859_s_at	35907_at	39822_s_at	32271_at	1793_at	2013_at	1347_at	39545_at	35249_at	33324_s_at	36839_at	39948_at	39821_s_at	1535_at
713_s_at	2028_s_at	1924_at	41060_at	41547_at	37458_at	1794_at	1584_at	34741_at	33822_at	1900_at	1925_at	499_at	41081_at	1570_f_at	39072_at	2044_s_at	37173_at	40549_at	1943_at	34543_at	1206_at	40915_r_at	806_at	1945_at	1720_at	37228_at	33317_at	38153_at	41545_at	1996_s_at	36650_at	1973_s_at	1974_s_at	41820_s_at	2008_s_at	1688_s_at	1774_at	39079_at	505_at	1854_at	35407_at	33847_s_at	37302_at
CR_CYTOSKELETON	PNAS_2005	39861_at	36037_g_at	1806_at	310_s_at	38350_f_at	32782_r_at	41730_at	38629_at	40304_at	40771_at	35496_at	836_at	36591_at	36675_r_at	1083_s_at	32166_at	38214_at	38783_at	38906_at	32749_s_at	32780_at	40796_at	36036_at	38396_at	38785_at	34091_s_at	32781_f_at	36601_at	32612_at	38784_g_at	114_r_at	41373_s_at	34160_at	927_s_at	39531_at	685_f_at	36038_r_at	1807_g_at	1645_at	40795_at	41731_g_at	36640_at	32750_r_at	113_i_at	34350_at
CR_DEATH	PNAS_2006	2060_at	AFFX-MurFAS_at	33945_at	34011_at	31491_s_at	37524_at	822_s_at	33166_at	34054_at	41700_at	41161_at	37724_at	486_at	34742_at	39999_at	654_at	1729_at	40413_at	422_s_at	1880_at	36004_at	378_s_at	197_at	2002_s_at	1997_s_at	37057_s_at	31791_at	36143_at	259_s_at	37227_at	37762_at	33775_s_at	1859_s_at	1715_at	38755_at	37226_at	1239_s_at	32746_at	1847_s_at	2067_f_at	1240_at	39948_at	1615_at	35662_at	36296_at	1981_s_at	195_s_at	487_g_at
	1766_g_at	574_s_at	1356_at	1867_at	1441_s_at	34543_at	40621_at	198_g_at	196_s_at	40729_s_at	41190_at	1868_g_at	31540_at	33903_at	38010_at	1211_s_at	1973_s_at	1974_s_at	1852_at	2008_s_at	35537_at	1774_at	39688_at	1910_s_at	34448_s_at	846_s_at	1858_at	2065_s_at	36199_at
CR_DNA_MET_AND_MOD	PNAS_2007	36563_at	1188_g_at	1376_at	1869_at	38301_at	1701_at	1124_at	35200_at	32256_r_at	38389_at	32258_r_at	33747_s_at	1055_g_at	39704_s_at	38982_at	32255_i_at	1329_s_at	32257_f_at	39269_at	33905_at	1196_at	37333_at	38388_at	35005_at	981_at	1187_at	1012_at	1342_g_at	144_at	37927_at	1696_at	34386_at	38138_at	41099_at	168_at	41067_at	1361_at
CR_HORMONAL_FUNCTIONS	PNAS_2008	33669_at	445_at	1316_at	611_at	34343_at	38178_at	34798_at	32520_at	1681_at	35846_at	160021_r_at	562_g_at	2048_s_at	561_at	38447_at	616_s_at
CR_IMMUNE_FUNCTION	PNAS_2009	37383_f_at	1520_s_at	1056_s_at	AFFX-MurIL10_at	40702_at	34860_g_at	31954_f_at	34009_at	771_s_at	37479_at	34233_i_at	36377_at	266_s_at	40599_at	538_at	38488_s_at	33391_r_at	34669_at	34232_at	36661_s_at	40755_at	38378_at	38567_at	34234_f_at	1611_s_at	1214_s_at	1666_at	37065_f_at	39351_at	33680_f_at	31498_f_at	1036_at	37003_at	38006_at	31960_f_at	1365_at	856_at	31870_at	38521_at	1066_at	1359_at	37889_at	33513_at	36656_at	36802_at	AFFX-MurIL4_at	38522_s_at	33981_at
CR_PROTEIN_MOD	PNAS_2010	363_at	36739_at	33536_at	1602_at	33911_at	883_s_at	37639_at	227_g_at	1336_s_at	1976_s_at	1779_s_at	33043_at	1094_g_at	382_at	38810_at	175_s_at	37946_at	41167_at	1460_g_at	41244_f_at	32372_at	36258_at	36359_at	36611_at	32843_s_at	34198_at	1888_s_at	38844_at	38912_at	39385_at	33896_at	38946_at	493_at	33238_at	39724_s_at	40186_at	31526_f_at	1389_at	1333_f_at	537_f_at	38480_s_at	37221_at	31885_at	438_at	392_g_at	38019_at	1091_at	41657_at
_at	36204_at	37996_s_at	32888_at	1496_at	1463_at	36215_at	36294_at	239_at	2012_s_at	33413_at	33325_at	39723_at	1250_at	40184_at	33770_at	1245_i_at	35338_at	1811_at	38415_at	226_at	916_at	33453_at	237_s_at	40519_at	37339_at	38845_at	41429_at	1781_at	32029_at	123_at	39068_at	551_at	2059_s_at	1559_at	160041_at	794_at	1780_at	40534_at	160029_at	31892_at	34411_at	33066_at	994_at	1562_g_at	1635_at	1488_at	32892_at	591_s_at	36835_at
_at	32304_at	34679_at	41579_s_at	275_at	1383_at	1524_at	1561_at	1256_at	995_g_at	39932_at	41768_at	1636_g_at	617_at	37629_at	38271_at	1658_g_at	1265_g_at	1560_g_at	32616_at	33910_at	37725_at	36651_at	1093_at	40129_at	1402_at	2041_i_at	1432_s_at	1241_at	539_at	33275_at	2040_s_at	1264_at	1217_g_at	1437_at	1668_s_at	38443_at	37997_r_at	37301_at	37107_at
CR_REPAIR	PNAS_2011	32118_at	41146_at	1989_at	34146_at	2003_s_at	267_at	1719_at	2025_s_at	1462_s_at	38335_at	41461_at	1324_at	1990_g_at	32274_r_at	37094_at	604_at	1824_s_at	38556_at	40744_at	2064_g_at	33724_at	32158_at	1993_s_at	1799_at	35397_at	36857_at	1872_at	34147_g_at	39664_at	1885_at	1800_g_at	36519_at	524_at	35647_at	40139_at	1944_f_at	41583_at	1902_at	1641_s_at	36041_at	1243_at	2063_at	2093_s_at	1258_s_at	1899_s_at	1850_at	38334_g_at	41197_at
CR_SIGNALLING	PNAS_2012	36578_at	1236_s_at	32519_at	739_at	41571_at	1068_g_at	40702_at	33323_r_at	1699_at	32666_at	38534_at	1563_s_at	2001_g_at	33514_at	36377_at	772_at	1045_s_at	506_s_at	40683_at	1647_at	255_s_at	36935_at	41230_at	38219_at	41481_at	34004_at	1421_at	1330_at	33524_at	37057_s_at	35301_at	38904_at	976_s_at	41594_at	1712_s_at	37460_at	552_at	35433_s_at	993_at	989_at	35561_at	31777_at	553_g_at	38289_r_at	38742_s_at	31549_at	35287_at	41506_at
35701_at	38431_at	1848_at	1498_at	1131_at	37952_at	38756_at	1303_at	1611_s_at	1214_s_at	852_at	1919_at	884_at	33338_at	38544_at	32716_at	1708_at	1394_at	1036_at	1392_at	2022_at	37309_at	1209_at	38369_at	961_at	1422_g_at	41144_g_at	39553_at	33869_at	32463_at	2014_s_at	1066_at	35772_at	36645_at	889_at	120_at	35731_at	39935_at	2075_s_at	1698_g_at	1866_g_at	37621_at	257_at	35652_g_at	1917_at	35651_at	1845_at	1010_at	1434_at	33319_at
3_s_at	2019_s_at	40033_at	34916_s_at	259_s_at	1395_at	1635_at	1488_at	2005_s_at	36953_at	34022_at	39700_at	38118_at	1067_at	39742_at	39730_at	36383_at	983_at	2007_g_at	32449_at	39402_at	848_at	37187_at	35842_at	1233_s_at	1543_at	38746_at	1675_at	39754_at	850_r_at	1856_at	35328_at	1669_at	41779_at	1021_at	33804_at	1084_at	406_at	1826_at	33341_at	1656_s_at	AFFX-MurIL10_at	36892_at	38886_i_at	36240_at	41049_at	34892_at	40479_at	35365_at	2032_s_at
36709_at	1853_at	1583_at	1157_s_at	41444_at	33339_g_at	2041_i_at	38743_f_at	1852_at	38750_at	41222_at	1011_s_at	41572_r_at	509_at	2040_s_at	32319_at	40480_s_at	35694_at	33411_g_at	35617_at	2091_at	39552_at	1706_at	39753_at	38213_at
CR_TRANSCRIPTION_FACTORS	PNAS_2013	1500_at	41484_r_at	160043_at	31457_at	41571_at	1433_g_at	40458_at	32583_at	37625_at	1476_s_at	37724_at	845_at	38787_at	567_s_at	1045_s_at	506_s_at	2042_s_at	38944_at	1295_at	979_g_at	37025_at	545_g_at	35158_at	35638_at	33474_at	473_g_at	32303_at	1341_at	393_s_at	36238_at	32063_at	566_at	32271_at	38491_at	1915_s_at	535_s_at	1985_s_at	544_at	1535_at	41175_at	789_at	1856_at	41442_at	41505_r_at	2094_s_at	41000_at	40268_at	33203_s_at
049_s_at	36645_at	35103_i_at	40007_at	780_at	943_at	39261_at	1454_at	1518_at	40363_r_at	1973_s_at	929_at	41425_at	224_at	40516_at	41222_at	1908_at	40109_at	559_s_at	41572_r_at	38739_at	33204_at	32800_at	37024_at	35104_r_at	1916_s_at	38374_at	39688_at	1854_at	40358_at	41854_at	405_at	40362_at
CR_TRANSPORT	PNAS_2014	34955_at	40768_s_at	39992_at	1931_at	40769_r_at	41196_at	38911_at	38520_r_at	421_at	39024_at
CR_TRANSPORT_OF_VESICLES	PNAS_2015	36172_s_at	35339_at	620_at	36110_at	34392_s_at	32581_at	809_at	35665_at	40521_at	622_at	34393_r_at	36173_r_at	34159_at	33371_s_at	808_at	1201_at	35340_at	40669_at	39244_at	600_at	36660_at	621_at	32150_at	37466_at	34836_at	1202_g_at	33372_at	1221_at	40210_at	35304_at	1074_at	40052_at	39795_at	624_at	623_s_at	37362_at
crebPathway	BioCarta	1565_s_at	227_g_at	1336_s_at	35373_at	32105_f_at	1564_at	35701_at	39388_at	33353_at	160029_at	36359_at	37733_at	976_s_at	38905_at	1269_at	34846_at	32304_at	31813_at	33855_at	37450_r_at	1590_s_at	1000_at	877_at	37448_s_at	1127_at	41768_at	33260_at	35580_at	31604_at	37535_at	40704_at	36215_at	32104_i_at	37221_at	2050_s_at	116_at	1671_s_at	650_s_at	1091_at	37449_i_at	41432_at	1217_g_at	1437_at	37301_at	40864_at	226_at	40566_at	34847_s_at
cremPathway	BioCarta	32066_g_at	37450_r_at	33353_at	37729_at	32065_at	32067_at	37448_s_at	37449_i_at	35580_at	562_g_at	31604_at	561_at
cskPathway	BioCarta	856_at	37450_r_at	33341_at	33238_at	40518_at	39226_at	227_g_at	40520_g_at	40519_at	35517_at	37448_s_at	41768_at	36772_at	37078_at	35580_at	31604_at	36215_at	432_s_at	2059_s_at	37221_at	116_at	1498_at	33353_at	38319_at	1091_at	36359_at	31710_at	37039_at	38905_at	37449_i_at	1768_s_at	226_at	36277_at	33831_at
ctla4Pathway	BioCarta	32861_s_at	33855_at	34021_at	1565_s_at	34607_at	1538_s_at	33238_at	38319_at	39226_at	1871_g_at	1870_at	1479_g_at	31710_at	1478_at	37039_at	36270_at	38443_at	37078_at	35373_at	35015_at	1269_at	36277_at	40704_at	2059_s_at	432_s_at
ctlPathway	BioCarta	38547_at	37643_at	1808_s_at	AFFX-MurFAS_at	37644_s_at	428_s_at	32640_at	38319_at	1851_s_at	37137_at	39226_at	1440_s_at	41237_at	34644_at	37918_at	1441_s_at	31710_at	201_s_at	37078_at	389_s_at	1858_at	36277_at	32904_at	432_s_at
cxcr4Pathway	BioCarta	38742_s_at	1377_at	2009_at	1590_s_at	33341_at	1082_at	1000_at	39222_at	36117_at	36645_at	1336_s_at	1378_g_at	38580_at	32666_at	34351_at	36772_at	35373_at	772_at	1045_s_at	40704_at	1917_at	38219_at	35701_at	1295_at	1130_at	38743_f_at	1844_s_at	33804_at	160029_at	976_s_at	33809_at	38438_at	649_s_at	1217_g_at	1437_at	1271_g_at	37301_at	38581_at	1269_at	32304_at	40566_at	33834_at
cytokinePathway	BioCarta	36296_at	1056_s_at	34021_at	1538_s_at	494_at	AFFX-MurIL10_at	436_at	1852_at	1359_at	40702_at	1021_at	AFFX-MurIL4_at	1611_s_at	38299_at	33981_at	258_at	1214_s_at	1666_at	1574_s_at	35372_r_at	563_at	1036_at	40599_at	1165_at	259_s_at	33955_at	34037_at	38488_s_at	1263_at
d4gdiPathway	BioCarta	41146_at	37227_at	33774_at	33775_s_at	1984_s_at	487_g_at	1287_at	1766_g_at	37137_at	31491_s_at	32583_at	574_s_at	2029_at	1765_at	39320_at	1326_at	486_at	36143_at	39927_at	32904_at	39999_at	35818_at
dcPathway	BioCarta	35150_at	494_at	AFFX-MurIL10_at	436_at	36802_at	40702_at	1021_at	AFFX-MurIL4_at	1611_s_at	33981_at	1401_g_at	771_s_at	1214_s_at	1666_at	1574_s_at	40310_at	563_at	35149_at	36709_at	40738_at	32953_at	1400_at	39385_at	33955_at	1263_at
deathPathway	BioCarta	37227_at	36578_at	1377_at	37378_r_at	2060_at	1717_s_at	33775_s_at	41189_at	1715_at	38755_at	36645_at	1766_g_at	37377_i_at	1378_g_at	34892_at	31491_s_at	32746_at	1867_at	33166_at	32047_at	1847_s_at	486_at	1210_s_at	1045_s_at	41190_at	1461_at	39999_at	1868_g_at	1729_at	35662_at	33774_at	40696_at	1295_at	487_g_at	974_at	32725_at	33784_at	33770_at	1765_at	38281_at	38438_at	1910_s_at	32726_g_at	1326_at	36143_at	37829_at	34937_at	1271_g_at
DNA_DAMAGE_SIGNALLING	GO	32318_s_at	37227_at	2025_s_at	35900_at	35899_at	2001_g_at	2000_at	1863_s_at	37229_at	39146_at	818_s_at	39147_g_at	846_s_at	1687_s_at	1997_s_at	2065_s_at	2067_f_at	2066_at	1998_i_at	1700_at	979_g_at	40091_at	36578_at	1717_s_at	38010_at	33724_at	1993_s_at	604_at	1989_at	1990_g_at	36634_at	38414_at	1738_at	35407_at	1347_at	1584_at	36839_at	1536_at	1942_s_at	2031_s_at	41497_at	1797_at	40218_at	40217_s_at	38920_at	37887_at	39664_at	1641_s_at
1345_at	41344_s_at	35221_at	36857_at	32118_at	1753_s_at	41197_at	1874_at	1533_at	39941_at	1872_at	1043_s_at	40744_at	1899_s_at	32158_at	1324_at	38908_s_at	35119_at	31855_at	1869_at	259_s_at	1852_at	34892_at	34916_s_at	1441_s_at	37644_s_at	37643_at	1440_s_at	389_s_at	1808_s_at	32319_at	1974_s_at	37686_s_at	1308_g_at	1307_at	1873_at	35647_at	160033_s_at	1300_at	1360_at	38733_at	585_at	584_s_at	2093_s_at
dnafragmentPathway	BioCarta	904_s_at	32047_at	1581_s_at	38281_at	32220_at	1592_at	36143_at	36571_at	40145_at	34937_at	38065_at	37137_at	33286_at
dreamPathway	BioCarta	37221_at	32066_g_at	116_at	40791_at	1000_at	2094_s_at	877_at	1091_at	227_g_at	32065_at	32583_at	35024_at	36359_at	32067_at	1916_s_at	38905_at	41768_at	1915_s_at	226_at	37535_at	36215_at
drug_resistance_and_metabolism	BioCarta	33848_r_at	1377_at	38261_at	1989_at	2060_at	1719_at	1682_s_at	38066_at	39482_at	32318_s_at	1378_g_at	1455_f_at	1442_at	1756_f_at	2051_at	2001_g_at	1025_g_at	AFFX-HSAC07/X00351_5_st	2052_g_at	37724_at	1781_at	AFFX-HSAC07/X00351_3_st	2021_s_at	38064_at	1571_f_at	34742_at	270_at	39247_at	AFFX-HUMGAPDH/M33197_M_st	33669_at	33638_at	1581_s_at	35968_s_at	37124_i_at	545_g_at	1997_s_at	36182_at	1792_g_at	37327_at	1537_at	41806_at	41473_at	38790_at	35433_s_at	1578_g_at	1024_at	1672_f_at	1896_s_at
99_at	37104_at	33721_at	1576_g_at	2066_at	38229_at	1755_i_at	964_at	542_at	1833_at	1990_g_at	1337_s_at	1828_s_at	604_at	2034_s_at	1930_at	38548_at	394_at	34017_s_at	33724_at	2020_at	AFFX-HSAC07/X00351_M_st	AFFX-HUMGAPDH/M33197_5_st	1993_s_at	41497_at	1998_i_at	1885_at	1827_s_at	32787_at	35647_at	31335_at	2031_s_at	2017_s_at	829_s_at	570_at	1713_s_at	1577_at	35684_at	1944_f_at	34384_at	41060_at	AFFX-HUMGAPDH/M33197_3_st	38507_at	1802_s_at	1710_s_at	1900_at	2038_g_at	160027_s_at	AFFX-HSAC07/X00351_3_at	1002_f_at
40516_at	1742_at	AFFX-HSAC07/X00351_5_at	34016_s_at	1039_s_at	33275_at	32800_at	1916_s_at	AFFX-HUMGAPDH/M33197_3_at	35967_at	1727_at	37763_at	38438_at	1910_s_at	2000_at	1307_at	1797_at	33847_s_at	2065_s_at	405_at	1575_at	37152_at	40362_at
ecmPathway	BioCarta	38742_s_at	38118_at	1590_s_at	1000_at	36117_at	120_at	40479_at	2039_s_at	33920_at	35373_at	36675_r_at	32808_at	32166_at	1917_at	40704_at	40481_r_at	35701_at	1130_at	38743_f_at	1844_s_at	32847_at	38904_at	976_s_at	32612_at	2029_at	34735_at	40480_s_at	2055_s_at	1394_at	1269_at	39927_at	1938_at	37484_at	36640_at	37309_at
edg1Pathway	BioCarta	41151_at	1731_at	33341_at	36938_at	461_at	1000_at	36117_at	1336_s_at	2032_s_at	35980_at	39071_at	36772_at	35580_at	35373_at	257_at	40704_at	1564_at	41797_at	2050_s_at	587_at	37952_at	33353_at	1987_at	1968_g_at	160029_at	38904_at	976_s_at	1988_at	852_at	32574_at	33809_at	36157_at	1217_g_at	1437_at	1394_at	41798_at	37301_at	1269_at	40864_at	32304_at	40566_at	1938_at	35703_at	37309_at
eea1Pathway	BioCarta	37327_at	32538_at	1537_at	36110_at	AFFX-HUMTFRR/M11507_5_at	39627_at	33887_at	AFFX-HUMTFRR/M11507_3_at	37324_at	AFFX-HUMTFRR/M11507_M_at	1542_at	600_at
EGF_receptor_signaling_pathway	BioCarta	33003_at	40663_at	33855_at	1565_s_at	38118_at	33004_g_at	1680_at	1511_at	37128_at	33997_at	34476_r_at	33002_at	37327_at	1537_at	1467_at	1249_at	32979_at	1542_at	37731_at
egfPathway	BioCarta	32859_at	38742_s_at	33855_at	38118_at	1565_s_at	2070_i_at	1590_s_at	1082_at	1000_at	289_at	1409_at	40458_at	1336_s_at	32583_at	594_s_at	40258_at	34351_at	1457_at	1915_s_at	33260_at	1781_at	35373_at	33009_at	506_s_at	2004_at	40704_at	1917_at	36935_at	1845_at	33339_g_at	1675_at	35701_at	1130_at	2094_s_at	38743_f_at	1844_s_at	40109_at	160029_at	33275_at	41594_at	1916_s_at	36910_at	37327_at	1537_at	32860_g_at	1712_s_at	33338_at	1217_g_at
egfr_smrtePathway	BioCarta	39359_s_at	1316_at	1671_s_at	1130_at	1844_s_at	39358_at	31709_at	32520_at	35846_at	37733_at	32800_at	1337_s_at	37327_at	1537_at	2048_s_at	33009_at	1542_at	39681_at	616_s_at	405_at	2004_at
Eicosanoid_Synthesis	BioCarta	41645_at	33153_at	37969_at	34636_at	38407_r_at	759_at	37099_at	307_at	36533_at	216_at	37430_at	33777_at	39968_at	37017_at	35124_at	38406_f_at	38081_at	37413_at	614_at
eif2Pathway	BioCarta	34758_at	167_at	1253_at	1154_at	33363_at	40645_at	1272_at	39368_at	32171_at	35934_at	32157_at	39784_at
eif4Pathway	BioCarta	35299_at	39553_at	267_at	1000_at	31950_at	1199_at	1420_s_at	41049_at	31951_s_at	1336_s_at	37752_at	38845_at	160030_at	2037_s_at	872_i_at	1306_at	35373_at	32029_at	31597_r_at	40704_at	37946_at	1564_at	33907_at	850_r_at	1671_s_at	1434_at	160029_at	40139_at	37733_at	976_s_at	238_at	41785_at	1217_g_at	1437_at	36234_at	37301_at	1269_at	38844_at	39552_at	32304_at	40566_at	851_s_at	32844_at
electron_transport	BioCarta	987_g_at	37195_at	1338_s_at	1649_at	35214_at	38229_at	34339_at	1755_i_at	41770_at	1493_r_at	1555_f_at	1492_f_at	35492_at	38460_at	31926_at	1455_f_at	38943_at	36533_at	1667_s_at	1756_f_at	1025_g_at	38548_at	1554_f_at	270_at	1517_at	39427_at	33389_at	41771_g_at	37285_at	37124_i_at	283_at	759_at	1305_s_at	33055_at	33202_f_at	501_g_at	1619_g_at	34340_at	38039_at	41720_r_at	1477_s_at	38802_at	38507_at	1650_g_at	38330_at	36104_at	1024_at	41717_at
1391_s_at	35646_at	41772_at	1759_f_at	35412_at	500_at
Electron_Transport_Chain	BioCarta	39921_at	37329_at	41760_at	38777_at	36205_at	32232_at	35297_at	38080_at	38660_at	40547_at	38395_at	35773_i_at	40872_at	38695_at	34401_at	38981_at	40427_at	35751_at	32774_at	40025_at	38983_at	34400_at	40134_at	38752_r_at	34420_at	40096_at	40135_at	34865_at	39427_at	38060_at	39443_s_at	31638_at	36107_at	283_at	34811_at	40435_at	40115_at	36165_at	38605_at	38693_at	37591_at	32752_at	36104_at	37029_at	34826_at	35264_at	34893_at	39027_at
electron_transporter_activity	BioCarta	38316_at	32214_at	40133_s_at	837_s_at	33644_at	37707_i_at	35216_at	35004_at	36164_at	35192_at	35649_at	35480_at	41750_at	770_at	37482_at	36936_at	37528_at	37332_r_at	1257_s_at	39559_at	36811_at	1160_at	37399_at	31883_at	35130_at	31824_at	34983_at	32485_at	40110_at	32570_at	41790_at	40467_at	33899_at	260_at	33931_at	32347_at	691_g_at	37322_s_at	32510_at	40782_at	33756_at	859_at	38465_at	38315_at	36184_at	33022_at	38893_at	33337_at
	34390_at	565_at	41440_at	34723_at	37430_at	36963_at	34464_at	34638_r_at	41038_at	41223_at	1080_s_at	32618_at	38895_i_at	34637_f_at	41751_at	37166_at	36992_at	38780_at	35925_at	38451_at	39113_at	37628_at	36247_f_at	660_at	36880_at	37330_at	37098_at	34982_at	32852_at	36589_at	37044_at	40071_at	40111_g_at	33519_at	34367_at	34070_s_at	35818_at	40159_r_at	32724_at
eosinophilsPathway	BioCarta	1405_i_at	1403_s_at	33098_at	37039_at	436_at	1404_r_at	40008_at	1400_at	1401_g_at	1263_at
ephA4Pathway	BioCarta	31737_at	1402_at	2024_s_at	40366_at	120_at	40479_at	40480_s_at	2055_s_at	2039_s_at	34331_at	1606_at	32808_at	40146_at	37484_at	32616_at	38551_at	40481_r_at
eponfkbPathway	BioCarta	34666_at	37468_at	1377_at	37135_f_at	31681_at	1295_at	35968_s_at	36645_at	1378_g_at	2031_s_at	1039_s_at	37134_f_at	1087_at	396_f_at	1023_at	35967_at	38438_at	37986_at	1271_g_at	1045_s_at	1461_at
epoPathway	BioCarta	38742_s_at	33855_at	31681_at	38118_at	1565_s_at	2070_i_at	1590_s_at	1082_at	33869_at	1000_at	40458_at	32583_at	594_s_at	1087_at	40258_at	34351_at	37986_at	1915_s_at	472_at	1781_at	33260_at	506_s_at	1917_at	37468_at	35701_at	1130_at	794_at	2094_s_at	38743_f_at	1844_s_at	396_f_at	33275_at	1916_s_at	1023_at	34006_s_at	473_g_at	2071_s_at	36235_at
erbb3Pathway	BioCarta	33639_g_at	32719_at	37327_at	33638_at	1537_at	1585_at	1723_g_at	37826_at	32787_at	1742_at	1542_at	209_at	2089_s_at
erbb4Pathway	BioCarta	35091_at	35658_at	641_at	1226_at	35090_g_at	1336_s_at	160029_at	642_s_at	1227_g_at	35089_at	1727_at	1217_g_at	1437_at	37301_at	32304_at	40566_at
erk5Pathway	BioCarta	1564_at	37711_at	33855_at	41747_s_at	37712_g_at	38118_at	1565_s_at	35701_at	1590_s_at	1082_at	1000_at	877_at	976_s_at	37710_at	1127_at	35434_at	34351_at	35617_at	37691_at	35373_at	1269_at	37535_at	36805_s_at	40704_at
erkPathway	BioCarta	34718_at	38742_s_at	33855_at	37450_r_at	32519_at	1565_s_at	38118_at	38725_s_at	35299_at	1731_at	1590_s_at	33341_at	1000_at	289_at	237_s_at	1657_at	1673_at	37448_s_at	1335_at	1127_at	41721_at	37724_at	33260_at	36772_at	1781_at	31604_at	32808_at	1658_g_at	1917_at	38726_at	35701_at	790_at	1973_s_at	1130_at	1827_s_at	1131_at	791_g_at	38743_f_at	1844_s_at	1987_at	1968_g_at	31335_at	217_at	38904_at	976_s_at	33275_at	1988_at	37327_at
erythPathway	BioCarta	597_at	41445_at	1501_at	35464_at	38299_at	1401_g_at	1735_g_at	1767_s_at	1262_s_at	1830_s_at	1023_at	1334_s_at	1065_at	34583_at	1400_at	38737_at	1975_s_at	971_s_at	34037_at	1263_at
etsPathway	BioCarta	39359_s_at	882_at	35701_at	1590_s_at	39705_at	1518_at	1724_at	2094_s_at	39358_at	31709_at	38706_at	1977_s_at	1908_at	32583_at	34368_at	1322_at	1519_at	38739_at	1916_s_at	2028_s_at	1986_at	1907_at	1703_g_at	1915_s_at	38707_r_at	160022_at	32597_at	32303_at	38810_at
extrinsicPathway	BioCarta	35752_s_at	39979_at	37019_at	33520_at	38825_at	36543_at	36622_at	41700_at	37202_at	35245_at	39255_at	40767_at	37175_at
fasPathway	BioCarta	41146_at	37378_r_at	AFFX-MurFAS_at	2070_i_at	37377_i_at	31491_s_at	32583_at	41161_at	1754_at	1558_g_at	1571_f_at	39999_at	2004_at	1559_at	1808_s_at	33774_at	36905_at	1851_s_at	37985_at	36987_at	1712_s_at	36143_at	34006_s_at	389_s_at	34198_at	34937_at	1672_f_at	34329_at	1900_at	33833_at	37643_at	1570_f_at	37644_s_at	33775_s_at	2044_s_at	38755_at	1766_g_at	32746_at	1867_at	1441_s_at	32047_at	33009_at	1868_g_at	1560_g_at	41384_at	35662_at	1845_at	40129_at
Fatty_Acid_Degradation	BioCarta	38099_r_at	33880_at	41022_r_at	36952_at	31834_r_at	37532_at	41209_at	38376_at	32033_at	40082_at	41021_s_at	38129_at	35229_at	39741_at	38130_s_at	35935_at	37523_at	34048_at	41648_at	32376_at	35228_at	40673_at	35435_s_at	33881_at	35936_g_at	39408_at	41530_at	38768_at
fatty_acid_metabolism	BioCarta	37593_at	36938_at	461_at	39236_s_at	36656_at	38320_s_at	41209_at	38586_at	37430_at	41693_r_at	35124_at	40082_at	38587_at	40782_at	33370_r_at	41697_at	929_at	501_g_at	35185_at	34769_at	40673_at	33369_at	39392_at	1391_s_at	38321_r_at	38429_at	1348_s_at	31718_at	35412_at	500_at
Fatty_Acid_Synthesis	BioCarta	31530_at	36705_at	38528_at	38529_at	39825_at	40881_at	186_at	38997_at	41015_at	37513_at	38000_at	35435_s_at	38998_g_at	38429_at	34346_at	35348_at	41530_at	31531_g_at	38768_at
fbw7Pathway	BioCarta	37757_at	41759_at	1570_f_at	2044_s_at	1273_r_at	39723_at	2010_at	1670_at	1322_at	39724_s_at	1792_g_at	1833_at	1274_s_at	2028_s_at	41060_at	2021_s_at	1571_f_at	1672_f_at	1900_at
fcer1Pathway	BioCarta	250_at	39780_at	1565_s_at	2070_i_at	249_at	548_s_at	1158_s_at	39144_at	1336_s_at	32583_at	34023_at	41143_at	1781_at	35373_at	35938_at	2004_at	41287_s_at	40822_at	39143_at	1559_at	35701_at	38277_at	1130_at	37370_i_at	1844_s_at	32540_at	160029_at	976_s_at	1919_at	41288_at	1712_s_at	34006_s_at	1269_at	34329_at	38742_s_at	33855_at	38118_at	34481_at	36889_at	1590_s_at	1082_at	41144_g_at	40823_s_at	1000_at	40075_at	36885_at	37369_s_at	911_s_at
fibrinolysisPathway	BioCarta	37172_at	37310_at	36622_at	41700_at	37202_at	38125_at	37185_at	37019_at	38052_at	38825_at	33452_at	672_at
fmlppathway	BioCarta	250_at	1377_at	39780_at	32519_at	33341_at	249_at	1158_s_at	39144_at	1378_g_at	35980_at	41143_at	1781_at	36772_at	1558_g_at	1045_s_at	1461_at	2004_at	41287_s_at	40822_at	39143_at	35701_at	1295_at	38277_at	1130_at	1131_at	1844_s_at	37370_i_at	32540_at	37733_at	976_s_at	41288_at	32863_at	36919_r_at	38742_s_at	40365_at	1590_s_at	1622_at	41144_g_at	40823_s_at	1000_at	39222_at	2014_s_at	251_at	36645_at	40075_at	37369_s_at	911_s_at	2075_s_at
freePathway	BioCarta	38386_r_at	1377_at	36620_at	33463_at	1295_at	35130_at	32972_at	32973_s_at	41631_f_at	1852_at	36645_at	1378_g_at	38438_at	35372_r_at	1271_g_at	37033_s_at	1045_s_at	259_s_at
fxrPathway	BioCarta	32800_at	31552_at	37505_at	643_at	36779_at	38519_at	512_at	33106_at	405_at	32855_at
G13_Signaling_Pathway	BioCarta	31699_at	810_at	32121_at	381_s_at	41144_g_at	32081_at	38963_i_at	32499_at	37276_at	33659_at	1158_s_at	321_at	911_s_at	38964_r_at	41017_at	33920_at	34197_at	41143_at	36675_r_at	1825_at	33073_at	1647_at	35652_g_at	40704_at	41287_s_at	175_s_at	40192_at	35651_at	2050_s_at	39736_at	33635_at	1984_s_at	41244_f_at	388_at	33628_g_at	33627_at	1015_s_at	37412_at	39875_at	41288_at	1709_g_at	1139_at	33074_g_at	33075_at	1708_at	1394_at	40864_at	37309_at
g1Pathway	BioCarta	33848_r_at	1635_at	36953_at	1863_s_at	1570_f_at	1607_at	1656_s_at	2044_s_at	39730_at	41445_at	1253_at	1433_g_at	1833_at	1262_s_at	1830_s_at	2001_g_at	37913_at	2034_s_at	1636_g_at	33324_s_at	1207_at	40915_r_at	2021_s_at	1571_f_at	38944_at	2020_at	37757_at	37229_at	34624_at	41545_at	1454_at	2041_i_at	1803_at	1974_s_at	1670_at	1914_at	2031_s_at	2017_s_at	1322_at	1735_g_at	40645_at	1713_s_at	509_at	1767_s_at	2040_s_at	1738_at	1792_g_at	476_s_at
g2Pathway	BioCarta	1863_s_at	33896_at	1424_s_at	38920_at	1859_s_at	2033_s_at	32188_at	32530_at	1347_at	1127_at	2001_g_at	604_at	409_at	33324_s_at	36909_at	40915_r_at	33724_at	1945_at	37228_at	551_at	34736_at	1993_s_at	37229_at	41497_at	37887_at	1880_at	40129_at	2012_s_at	1273_r_at	1803_at	1974_s_at	32189_g_at	1250_at	2008_s_at	2031_s_at	1738_at	1274_s_at	2000_at	35407_at	1797_at	1584_at	1911_s_at	32187_at	38509_at
gabaPathway	BioCarta	36323_at	34025_at	37298_at	38719_at	31726_at	37062_at	32138_at	1938_at	39321_at	38904_at
gata3Pathway	BioCarta	37221_at	116_at	1671_s_at	1622_at	494_at	41505_r_at	40511_at	436_at	2049_s_at	1091_at	39144_at	227_g_at	AFFX-MurIL4_at	32786_at	33981_at	36359_at	37733_at	41504_s_at	1574_s_at	38905_at	41768_at	2075_s_at	226_at	36215_at	39143_at
gcrPathway	BioCarta	1377_at	37450_r_at	33341_at	41144_g_at	32316_s_at	36645_at	40075_at	1158_s_at	1378_g_at	911_s_at	610_at	37448_s_at	41143_at	36772_at	35373_at	31604_at	1102_s_at	1045_s_at	40704_at	41287_s_at	1564_at	1295_at	37403_at	1961_f_at	36690_at	41288_at	37449_i_at	38438_at	576_at	1271_g_at	1269_at
ghPathway	BioCarta	38742_s_at	33855_at	1565_s_at	38118_at	1590_s_at	1082_at	1572_s_at	33869_at	1000_at	1409_at	34639_at	41049_at	40458_at	1336_s_at	160030_at	872_i_at	1127_at	34351_at	33260_at	472_at	35373_at	34640_at	506_s_at	1332_f_at	160038_s_at	40704_at	1917_at	37468_at	850_r_at	35701_at	33162_at	1130_at	794_at	38743_f_at	1844_s_at	40109_at	160029_at	976_s_at	37076_at	41593_at	1217_g_at	1437_at	41592_at	473_g_at	37301_at	1269_at	32304_at	40566_at
gleevecPathway	BioCarta	32859_at	38742_s_at	33855_at	2060_at	1565_s_at	2070_i_at	1590_s_at	33869_at	1000_at	40458_at	32583_at	1847_s_at	1915_s_at	37724_at	472_at	33260_at	35373_at	1333_f_at	33009_at	506_s_at	2004_at	537_f_at	40704_at	1917_at	517_at	415_at	1564_at	37468_at	1845_at	33339_g_at	35701_at	1973_s_at	1130_at	1827_s_at	2094_s_at	38743_f_at	1844_s_at	33524_at	35301_at	1916_s_at	36910_at	32860_g_at	1712_s_at	33338_at	1910_s_at	34006_s_at	473_g_at	1909_at
Glycogen_Metabolism	BioCarta	1383_at	632_at	40876_at	41144_g_at	39127_f_at	1384_at	37215_at	635_s_at	930_at	237_s_at	1253_at	39128_r_at	37373_at	1158_s_at	40057_at	176_at	922_at	41429_at	911_s_at	1094_g_at	41143_at	903_at	40682_at	37299_at	32734_at	32643_at	41287_s_at	39068_at	41167_at	1093_at	40867_at	40785_g_at	35211_at	36667_at	35334_at	33745_at	40645_at	32210_at	37392_at	38253_at	33181_at	41288_at	40786_at	33571_at	38252_s_at	35558_at	924_s_at	36480_at
Glycolysis_and_Gluconeogenesis	BioCarta	40964_at	40764_at	41485_at	33819_at	38638_at	36608_at	33703_f_at	39122_at	35905_s_at	39482_at	AFFX-HUMGAPDH/M33197_M_at	36241_r_at	41221_at	AFFX-HUMGAPDH/M33197_5_at	38000_at	40925_at	34542_at	32379_f_at	33455_at	32336_at	31488_s_at	39160_at	32378_at	AFFX-HUMGAPDH/M33197_5_st	AFFX-HUMGAPDH/M33197_M_st	36372_at	2035_s_at	36163_at	36164_at	33702_f_at	39084_at	41092_at	36196_at	36495_at	40116_at	40193_at	40293_at	39175_at	40107_at	33013_at	37677_at	AFFX-HUMGAPDH/M33197_3_at	39001_at	AFFX-HUMGAPDH/M33197_3_st	36026_at	39041_at	33820_g_at	35343_at
glycolysisPathway	BioCarta	2035_s_at	39122_at	40116_at	35905_s_at	39482_at	AFFX-HUMGAPDH/M33197_M_at	37677_at	41221_at	AFFX-HUMGAPDH/M33197_3_at	AFFX-HUMGAPDH/M33197_5_at	AFFX-HUMGAPDH/M33197_3_st	33455_at	31488_s_at	AFFX-HUMGAPDH/M33197_5_st	AFFX-HUMGAPDH/M33197_M_st
gpcrPathway	BioCarta	250_at	39780_at	33341_at	249_at	865_at	227_g_at	1158_s_at	39144_at	1336_s_at	32583_at	38580_at	41143_at	36772_at	1781_at	41287_s_at	40822_at	39143_at	35701_at	38277_at	1130_at	33353_at	1844_s_at	37370_i_at	32540_at	160029_at	36359_at	38905_at	41288_at	33229_at	38581_at	32304_at	38742_s_at	37450_r_at	1590_s_at	1082_at	41144_g_at	40823_s_at	1000_at	877_at	40075_at	37369_s_at	911_s_at	37448_s_at	41768_at	34351_at	1915_s_at	35580_at	31604_at
GPCRs_Class_A_Rhodopsin-like	GO	36268_at	33092_at	31408_at	33070_at	33525_at	33549_at	34015_at	1032_at	627_g_at	38247_at	33551_s_at	31905_at	32009_at	36390_at	35503_at	41700_at	32471_at	34550_at	184_at	346_s_at	35469_at	36245_at	32492_g_at	35042_at	36906_at	33460_at	35923_at	34466_at	34536_g_at	33098_at	648_at	33580_r_at	40400_at	2083_at	39624_at	33550_at	31700_at	32998_at	35470_at	31406_at	31549_at	33100_at	33462_at	664_at	32293_at	36324_at	34468_at	33011_at
3607_at	33772_at	341_at	34535_at	38209_at	34077_at	34514_at	649_s_at	39616_at	1097_s_at	35471_g_at	562_g_at	38222_at	36919_r_at	37455_at	39938_g_at	37447_at	1128_s_at	32115_r_at	1004_at	34297_at	1118_at	775_at	36255_at	35024_at	34513_at	1352_at	34597_at	33766_at	32430_at	32687_s_at	33496_at	39937_at	33465_at	34467_g_at	37095_r_at	32688_at	34580_at	1507_s_at	36344_at	35080_at	36728_at	32068_at	31972_at	39972_at	31763_at	34288_at	34515_g_at	36292_at	34558_at
GPCRs_Class_A_Rhodopsin-like_2	GO	253_g_at	38749_at	166_at	40299_at	40300_g_at	31334_at	252_at	38332_at	34951_at	31919_at	40301_at	33142_at
GPCRs_Class_B_Secretin-like	GO	38853_at	41418_at	533_g_at	35568_at	40650_r_at	32886_at	1123_at	36746_s_at	33948_at	36404_at	31965_at	36388_at	40651_s_at	33766_at	36405_s_at	532_at	35589_at	32902_at	35625_at	34995_at	34174_s_at	35590_s_at	34288_at	33949_at	32964_at	33872_at	33950_g_at	33359_at
GPCRs_Class_C_Metabotropic_glutamate_pheromone	GO	33510_s_at	38959_s_at	33764_at	35485_at	32498_at	40240_at	37568_at	40079_at	34007_at	35423_at	33730_at	31585_at	31468_f_at	39928_at	32623_at	38958_at	33509_at	35424_g_at
gsk3Pathway	BioCarta	32531_at	1377_at	38369_at	1253_at	237_s_at	36645_at	1378_g_at	1912_s_at	38300_at	35373_at	32029_at	36021_at	1045_s_at	1853_at	1100_at	2020_at	40704_at	1564_at	36661_s_at	1295_at	33956_at	163_at	2018_at	2017_s_at	33319_at	40645_at	40777_at	36182_at	33181_at	33809_at	38438_at	35013_at	35433_s_at	1271_g_at	1269_at	38418_at
gsPathway	BioCarta	568_at	37450_r_at	438_at	33341_at	33353_at	227_g_at	37448_s_at	37449_i_at	41768_at	36772_at	569_g_at	35580_at	31604_at	226_at
hbxPathway	BioCarta	2009_at	33855_at	38118_at	1565_s_at	35701_at	1590_s_at	877_at	33804_at	38904_at	33260_at	38054_at	37535_at	1938_at
hcmvPathway	BioCarta	1377_at	1570_f_at	32519_at	1622_at	2044_s_at	1000_at	2014_s_at	36645_at	877_at	1378_g_at	2075_s_at	35373_at	1571_f_at	33009_at	1045_s_at	37535_at	2004_at	40704_at	1543_at	1564_at	1295_at	1671_s_at	1130_at	1131_at	1844_s_at	37733_at	976_s_at	38438_at	1271_g_at	1672_f_at	1269_at	1900_at	1156_at
hdacPathway	BioCarta	34718_at	39780_at	41747_s_at	37712_g_at	41144_g_at	1572_s_at	1424_s_at	2014_s_at	251_at	40075_at	39144_at	1158_s_at	37710_at	34020_at	911_s_at	1335_at	35434_at	41143_at	35373_at	281_s_at	38810_at	160038_s_at	40704_at	1975_s_at	41287_s_at	1543_at	39143_at	1564_at	37711_at	33162_at	38277_at	1671_s_at	1501_at	31335_at	32540_at	37733_at	32541_at	41288_at	35617_at	37691_at	32863_at	33482_at	1269_at	38737_at	37652_at
hifPathway	BioCarta	36100_at	41485_at	33896_at	36666_at	32316_s_at	35968_s_at	1789_at	877_at	32583_at	1961_f_at	1039_s_at	1953_at	1023_at	35967_at	691_g_at	576_at	710_at	1668_s_at	36101_s_at	37528_at	40871_at	37535_at	551_at
hivnefPathway	BioCarta	41146_at	36578_at	1377_at	37378_r_at	2060_at	2070_i_at	AFFX-MurFAS_at	37377_i_at	1378_g_at	31491_s_at	822_s_at	33166_at	1563_s_at	33300_at	41161_at	1754_at	486_at	32004_s_at	41349_at	1571_f_at	1045_s_at	1461_at	33299_at	2004_at	1729_at	1559_at	36935_at	1808_s_at	1880_at	34449_at	33774_at	40696_at	1295_at	974_at	1851_s_at	33813_at	37985_at	36987_at	33784_at	36143_at	34006_s_at	389_s_at	34937_at	1672_f_at	34329_at	33822_at	259_s_at	1900_at
33770_at	1245_i_at	34160_at	38281_at	38438_at	1910_s_at	849_g_at	32726_g_at	34448_s_at	1271_g_at	1909_at	1858_at	2071_s_at	475_at	35818_at	38509_at
hsp27Pathway	BioCarta	37643_at	37227_at	1991_s_at	1808_s_at	2060_at	AFFX-MurFAS_at	37644_s_at	541_g_at	36180_s_at	31737_at	487_g_at	1851_s_at	1852_at	1440_s_at	39237_at	1439_s_at	1441_s_at	41161_at	36785_at	36179_at	1754_at	1910_s_at	1847_s_at	486_at	36143_at	389_s_at	540_at	1909_at	1858_at	35818_at	259_s_at	2038_g_at	1637_at
ifnaPathway	BioCarta	41594_at	32859_at	1214_s_at	1666_at	33339_g_at	32860_g_at	33338_at	1457_at	1588_at	993_at	1244_at	36770_at	1157_s_at	38517_at
ifngPathway	na	41594_at	32859_at	37468_at	33339_g_at	32860_g_at	33338_at	1457_at	40702_at	1021_at	41140_at	1611_s_at	1038_s_at
igf1mtorPathway	BioCarta	34718_at	39553_at	267_at	1253_at	237_s_at	37752_at	38845_at	2037_s_at	1272_at	39368_at	1335_at	35373_at	32029_at	31597_r_at	35934_at	36598_s_at	40704_at	1975_s_at	39784_at	37946_at	1564_at	34758_at	1501_at	1154_at	31335_at	1434_at	40645_at	40139_at	35125_at	33181_at	238_at	1269_at	38844_at	39552_at	38737_at
igf1Pathway	BioCarta	34718_at	38742_s_at	33855_at	1565_s_at	38118_at	2070_i_at	1590_s_at	1000_at	1409_at	41049_at	32583_at	1871_g_at	594_s_at	1870_at	872_i_at	1335_at	40258_at	1915_s_at	1781_at	33260_at	35373_at	1917_at	40704_at	1975_s_at	36935_at	1675_at	850_r_at	35701_at	1130_at	2094_s_at	1501_at	38743_f_at	1844_s_at	31335_at	40109_at	33275_at	1916_s_at	38443_at	34006_s_at	1269_at	2071_s_at	36235_at	38737_at	851_s_at
igf1rPathway	BioCarta	34718_at	1564_at	38742_s_at	33855_at	850_r_at	38118_at	1565_s_at	35701_at	1590_s_at	1861_at	1424_s_at	1130_at	1000_at	38743_f_at	1844_s_at	41049_at	31335_at	976_s_at	872_i_at	1335_at	33260_at	35373_at	1269_at	40704_at	1917_at	851_s_at
il10Pathway	BioCarta	32859_at	33339_g_at	1062_g_at	AFFX-MurIL10_at	289_at	1852_at	40458_at	38299_at	33228_g_at	41594_at	1569_r_at	32860_g_at	33338_at	37002_at	1457_at	35659_at	33802_at	1061_at	506_s_at	33227_at	32618_at	259_s_at	39708_at
Il12Pathway	BioCarta	37468_at	2070_i_at	1671_s_at	2014_s_at	38319_at	1066_at	39226_at	40702_at	1021_at	1611_s_at	32583_at	34077_at	37733_at	34818_at	31710_at	563_at	37078_at	34006_s_at	993_at	36377_at	2071_s_at	36277_at	1534_at	1165_at	33955_at	432_s_at	906_at	1543_at
il17Pathway	BioCarta	856_at	597_at	38319_at	1359_at	38747_at	39226_at	40699_at	38299_at	35517_at	31710_at	35372_r_at	1334_s_at	37078_at	40738_at	36277_at	37177_at	432_s_at	538_at	1263_at
il18Pathway	BioCarta	34021_at	39320_at	1538_s_at	563_at	40702_at	1021_at	1611_s_at	1165_at	33955_at	574_s_at
il1rPathway	BioCarta	1377_at	1520_s_at	1209_at	38369_at	2070_i_at	1622_at	41445_at	2014_s_at	36645_at	1368_at	1378_g_at	32583_at	39402_at	1262_s_at	1830_s_at	2075_s_at	38546_at	33009_at	1045_s_at	1461_at	1100_at	2004_at	1543_at	1295_at	1671_s_at	36905_at	974_at	1852_at	38299_at	35634_at	1735_g_at	1767_s_at	37733_at	1214_s_at	1666_at	31343_at	33770_at	38438_at	34006_s_at	1271_g_at	37603_at	2071_s_at	259_s_at	971_s_at	35960_at
il22bpPathway	BioCarta	32859_at	37468_at	2005_s_at	33339_g_at	33869_at	1062_g_at	289_at	1547_at	40458_at	2007_g_at	40968_at	41594_at	32860_g_at	33338_at	1457_at	35659_at	472_at	993_at	473_g_at	1061_at	506_s_at	2006_at	39708_at
il2Pathway	BioCarta	1365_at	38742_s_at	2005_s_at	33855_at	34021_at	38118_at	1565_s_at	2070_i_at	1590_s_at	1538_s_at	33869_at	1000_at	33238_at	548_s_at	1547_at	40458_at	32583_at	594_s_at	2007_g_at	36885_at	1702_at	40258_at	1457_at	1915_s_at	472_at	1781_at	33260_at	506_s_at	2006_at	1917_at	2059_s_at	35701_at	1130_at	2094_s_at	38743_f_at	1844_s_at	1506_at	33275_at	41594_at	1916_s_at	34006_s_at	473_g_at	2071_s_at	36235_at
il2rbPathway	BioCarta	2060_at	1565_s_at	AFFX-MurFAS_at	548_s_at	41049_at	40458_at	2037_s_at	40968_at	872_i_at	1457_at	37724_at	472_at	35373_at	34742_at	2006_at	506_s_at	415_at	37946_at	1564_at	1808_s_at	35701_at	794_at	1827_s_at	1851_s_at	33524_at	1322_at	35301_at	976_s_at	41594_at	2028_s_at	238_at	41593_at	389_s_at	41592_at	473_g_at	1269_at	2038_g_at	37643_at	1365_at	38742_s_at	2005_s_at	33855_at	38118_at	37644_s_at	1590_s_at	1861_at	33869_at	1000_at
il3Pathway	BioCarta	38742_s_at	37468_at	33855_at	1565_s_at	38118_at	35701_at	1590_s_at	33869_at	1130_at	794_at	1000_at	2094_s_at	37493_at	38743_f_at	1844_s_at	40458_at	37494_at	1916_s_at	1086_at	1915_s_at	33260_at	472_at	473_g_at	506_s_at	1917_at	1263_at
il4Pathway	BioCarta	37946_at	1564_at	2005_s_at	33855_at	850_r_at	38118_at	1565_s_at	41222_at	1506_at	41049_at	1547_at	AFFX-MurIL4_at	2007_g_at	33981_at	2037_s_at	404_at	41594_at	872_i_at	1574_s_at	238_at	1457_at	845_at	2006_at	851_s_at
il5Pathway	BioCarta	39402_at	856_at	35517_at	1574_s_at	33098_at	37039_at	1520_s_at	436_at	40008_at	AFFX-MurIL4_at	36755_s_at	38299_at	33981_at
il6Pathway	BioCarta	38742_s_at	2005_s_at	33855_at	1565_s_at	38118_at	1590_s_at	1000_at	289_at	1409_at	1547_at	32583_at	1871_g_at	594_s_at	2007_g_at	1870_at	40258_at	1457_at	1915_s_at	1781_at	33260_at	35842_at	37621_at	2006_at	1917_at	37468_at	38354_at	35701_at	160032_at	1130_at	2094_s_at	38743_f_at	1844_s_at	38299_at	40109_at	33275_at	41594_at	1916_s_at	38443_at	36235_at	39708_at
il7Pathway	BioCarta	2005_s_at	2009_at	2060_at	33896_at	33869_at	33238_at	1547_at	40458_at	33966_at	40479_at	2007_g_at	41630_at	2039_s_at	1457_at	1847_s_at	472_at	35373_at	1370_at	2006_at	506_s_at	40704_at	551_at	2059_s_at	40481_r_at	1506_at	36472_at	33804_at	41594_at	40480_s_at	1910_s_at	1159_at	473_g_at	36227_at	1909_at	1269_at	33831_at	2038_g_at
Inflammatory_Response_Pathway	BioCarta	1365_at	32861_s_at	34021_at	1538_s_at	33945_at	35474_s_at	33238_at	40702_at	AFFX-MurIL4_at	33377_at	33981_at	1702_at	32307_s_at	35015_at	41610_at	1083_s_at	38812_at	35280_at	2059_s_at	38783_at	232_at	32306_g_at	32670_at	1498_at	581_at	436_at	1506_at	32308_r_at	1021_at	38785_at	1611_s_at	36755_s_at	32305_at	35281_at	404_at	38784_g_at	32488_at	1574_s_at	31719_at	35473_at	36270_at	927_s_at	31720_s_at
inflamPathway	BioCarta	856_at	34021_at	1538_s_at	AFFX-MurIL10_at	41445_at	40702_at	AFFX-MurIL4_at	33966_at	33981_at	258_at	1262_s_at	1830_s_at	35517_at	41630_at	563_at	1334_s_at	38488_s_at	1263_at	36296_at	882_at	494_at	436_at	1852_at	35464_at	1021_at	1611_s_at	38299_at	1401_g_at	1735_g_at	1767_s_at	1214_s_at	1666_at	1574_s_at	37039_at	35372_r_at	1159_at	1036_at	1400_at	35703_at	259_s_at	33955_at	971_s_at
insulin_signalling	BioCarta	36100_at	363_at	1602_at	40964_at	32519_at	1565_s_at	38529_at	1572_s_at	815_at	1253_at	39482_at	32318_s_at	1336_s_at	32583_at	38604_at	39069_at	35315_at	AFFX-HSAC07/X00351_5_st	1249_at	31982_at	35373_at	AFFX-HSAC07/X00351_3_st	32029_at	32979_at	772_at	34742_at	40972_at	37807_at	AFFX-HUMGAPDH/M33197_M_st	1419_g_at	37946_at	38219_at	33162_at	1130_at	1232_s_at	36519_at	388_at	160029_at	976_s_at	1707_g_at	37591_at	322_at	1269_at	989_at	33003_at	38742_s_at	31552_at	33855_at
61_at	1870_at	33002_at	2023_g_at	2037_s_at	935_at	872_i_at	32827_at	39093_s_at	40925_at	34197_at	32379_f_at	40459_at	40507_at	32378_at	AFFX-HSAC07/X00351_M_st	AFFX-HUMGAPDH/M33197_5_st	31531_g_at	1603_g_at	1564_at	38354_at	38338_at	35701_at	1131_at	1844_s_at	816_g_at	362_at	40139_at	238_at	37076_at	AFFX-HUMGAPDH/M33197_3_st	1902_at	32857_at	38272_at	34479_at	2022_at	32157_at	AFFX-HSAC07/X00351_3_at	37188_at	41579_s_at	31530_at	31699_at	33604_at	38042_at	632_at	32550_r_at	1511_at	35905_s_at	37752_at	40283_at
insulinPathway	BioCarta	38742_s_at	33855_at	1565_s_at	38118_at	2070_i_at	1590_s_at	1572_s_at	1000_at	1409_at	41049_at	32583_at	1871_g_at	594_s_at	1870_at	872_i_at	40258_at	1915_s_at	1781_at	33260_at	35373_at	160038_s_at	1917_at	40704_at	36935_at	1675_at	850_r_at	35701_at	33162_at	1130_at	2094_s_at	38743_f_at	1844_s_at	40109_at	33275_at	1916_s_at	37076_at	38443_at	34006_s_at	1269_at	2071_s_at	36235_at	851_s_at
integrinPathway	BioCarta	32519_at	1565_s_at	2070_i_at	33908_at	34499_at	36240_at	32583_at	40479_at	36958_at	2039_s_at	39330_s_at	517_at	40481_r_at	415_at	35701_at	1130_at	1848_at	1131_at	1844_s_at	36119_at	33524_at	38756_at	35301_at	36601_at	38904_at	976_s_at	34735_at	34006_s_at	1394_at	1768_s_at	37484_at	34679_at	37309_at	38742_s_at	33855_at	38118_at	1590_s_at	1000_at	36117_at	120_at	33260_at	1333_f_at	32808_at	41137_at	32166_at	39329_at	537_f_at	1917_at
intrinsicPathway	BioCarta	35752_s_at	37550_at	36659_at	37235_g_at	33563_s_at	33562_g_at	32667_at	33561_at	37838_at	39979_at	37019_at	37234_at	35493_at	38825_at	39939_at	35591_at	779_at	35556_at	36622_at	37202_at	41700_at	32353_at	39775_at	35245_at	37236_at	39255_at	37175_at	39333_at
ionPathway	BioCarta	2009_at	34351_at	1082_at	1217_g_at	1437_at	37301_at	36292_at	1336_s_at	33804_at	32304_at	40566_at	160029_at
keratinocytePathway	BioCarta	363_at	1377_at	2060_at	2070_i_at	AFFX-MurFAS_at	237_s_at	1378_g_at	1336_s_at	32583_at	1519_at	32891_at	1563_s_at	41161_at	1754_at	1045_s_at	1461_at	2004_at	1808_s_at	35701_at	1295_at	40696_at	1130_at	1844_s_at	974_at	1851_s_at	33813_at	160029_at	37733_at	976_s_at	37327_at	33181_at	1537_at	33784_at	1712_s_at	34006_s_at	389_s_at	1542_at	32304_at	259_s_at	1156_at	2038_g_at	35960_at	37643_at	38742_s_at	417_at	37644_s_at	1590_s_at	1622_at
Krebs-TCA_Cycle	BioCarta	32332_at	36739_at	40112_at	38638_at	36608_at	40110_at	40467_at	36720_at	36718_s_at	160044_g_at	38845_at	33257_at	32546_at	41314_at	38000_at	35751_at	39160_at	40470_at	34385_at	36163_at	36164_at	36665_at	33013_at	39001_at	36574_at	40111_g_at	36386_at	39041_at	38844_at	33258_g_at	36195_at	36719_r_at	34826_at
lairPathway	BioCarta	38547_at	37816_at	40366_at	583_s_at	32640_at	1852_at	37394_at	41433_at	35731_at	38299_at	37918_at	2055_s_at	41701_at	35372_r_at	37541_at	32808_at	2061_at	259_s_at
lechtinPathway	BioCarta	32946_r_at	33401_at	32945_i_at	40766_at	41701_at	37816_at	41023_at	33374_at	37515_at	37394_at	37514_s_at	35526_at
leptinPathway	BioCarta	36705_at	38528_at	186_at	33829_at	41015_at	33830_at	34267_r_at	35229_at	35895_at	34346_at	35348_at	34266_at
longevityPathway	BioCarta	34666_at	34718_at	1564_at	36620_at	34740_at	38118_at	35701_at	1590_s_at	1501_at	31335_at	160030_at	692_s_at	1335_at	35373_at	1269_at	1332_f_at	38737_at	37009_at	40704_at	1975_s_at
lymphocytePathway	BioCarta	38547_at	31616_r_at	40493_at	32640_at	265_s_at	37398_at	35731_at	31615_i_at	31472_s_at	37918_at	1126_s_at	2055_s_at	37397_at	2036_s_at	245_at	32808_at	2061_at
malatexPathway	BioCarta	41314_at	837_s_at	33644_at	39825_at	38638_at	31824_at	38000_at	36608_at	38998_g_at	40881_at	38997_at	32197_at
MAP_kinase_activity	GenMAPP	976_s_at	1671_s_at	984_g_at	1010_at	35617_at	1000_at	160039_at	40033_at	983_at	33245_at	37733_at
MAP_kinase_kinase_activity	GenMAPP	39237_at	1991_s_at	41507_at	1709_g_at	41506_at	1671_s_at	1622_at	2075_s_at	1130_at	1708_at	1844_s_at	2014_s_at	1637_at	41444_at	37733_at	1543_at
MAP00010_Glycolysis_Gluconeogenesis	GenMAPP	40964_at	37206_at	33819_at	38638_at	36221_at	39482_at	40685_at	36686_at	40925_at	37708_r_at	32379_f_at	37707_i_at	33455_at	31488_s_at	37807_at	39160_at	32378_at	AFFX-HUMGAPDH/M33197_5_st	AFFX-HUMGAPDH/M33197_M_st	36372_at	36163_at	33529_at	40031_at	36196_at	40193_at	37956_at	40409_at	37677_at	AFFX-HUMGAPDH/M33197_3_st	33759_at	32747_at	35730_at	38503_at	37015_at	41485_at	39122_at	35905_s_at	AFFX-HUMGAPDH/M33197_M_at	36241_r_at	41221_at	AFFX-HUMGAPDH/M33197_5_at	34638_r_at	32336_at	34637_f_at	2035_s_at	39084_at	41092_at	36247_f_at
MAP00020_Citrate_cycle_TCA_cycle	GenMAPP	32332_at	36163_at	40077_at	36608_at	33702_f_at	33703_f_at	40881_at	36665_at	160044_g_at	33257_at	32546_at	39001_at	36574_at	41314_at	38000_at	39023_at	35751_at	33258_g_at	36195_at	34826_at	40470_at
MAP00030_Pentose_phosphate_pathway	GenMAPP	38042_at	36489_at	39122_at	36196_at	36495_at	40116_at	41490_at	40293_at	39175_at	40107_at	32210_at	36490_s_at	34066_at	36963_at	37311_at	33455_at	32336_at
MAP00051_Fructose_and_mannose_metabolism	GenMAPP	36372_at	40964_at	32028_at	37607_at	36196_at	36495_at	40116_at	40293_at	40107_at	39175_at	38763_at	36589_at	36673_at	37606_at	37189_at	33980_at	33455_at	32336_at	37807_at	38139_at	37608_g_at
MAP00052_Galactose_metabolism	GenMAPP	36372_at	32772_s_at	40964_at	34625_at	34509_at	31598_s_at	36196_at	40116_at	37373_at	40960_at	32917_at	36833_at	34177_at	39175_at	31816_at	36241_r_at	36589_at	32210_at	37825_at	37742_at	35558_at	36664_at	37807_at	33183_at
MAP00071_Fatty_acid_metabolism	GenMAPP	33880_at	987_g_at	1338_s_at	37206_at	38229_at	1755_i_at	1493_r_at	36952_at	1492_f_at	1555_f_at	37532_at	1455_f_at	1667_s_at	1756_f_at	1025_g_at	38548_at	37708_r_at	37707_i_at	40459_at	1554_f_at	270_at	37523_at	1517_at	32452_at	33529_at	33389_at	37124_i_at	501_g_at	1619_g_at	40409_at	38039_at	1477_s_at	38507_at	33881_at	32747_at	35730_at	1024_at	36417_s_at	38503_at	41530_at	39678_at	38099_r_at	37015_at	986_at	37016_at	37125_f_at	40082_at	34638_r_at
MAP00100_Sterol_biosynthesis	GenMAPP	39108_at	36985_at	34410_at	34848_at	33421_s_at	35839_at	37325_at	36907_at	39107_at	36880_at	39328_at
MAP00120_Bile_acid_biosynthesis	GenMAPP	37015_at	589_at	37206_at	33529_at	36247_f_at	34118_at	31926_at	34084_at	36384_at	565_at	40409_at	39177_r_at	999_at	33519_at	34638_r_at	37708_r_at	37707_i_at	32747_at	35730_at	38745_at	40415_at	36417_s_at	39741_at	38503_at	39176_f_at	41530_at	34637_f_at
MAP00140_C21_Steroid_hormone_metabolism	GenMAPP	31789_at	586_s_at	37195_at	34549_g_at	39697_at	34548_at	32342_at	35702_at	34002_at	34084_at	247_s_at	35721_at
MAP00150_Androgen_and_estrogen_metabolism	GenMAPP	40376_at	589_at	37206_at	34549_g_at	39978_at	37058_at	38178_at	34084_at	565_at	33069_f_at	38034_at	33519_at	39697_at	34548_at	41568_at	32342_at	33068_f_at	35702_at	34002_at	35721_at
MAP00190_Oxidative_phosphorylation	GenMAPP	39921_at	37948_at	41760_at	34893_at	40568_at	39027_at	33033_at	38660_at	37367_at	38395_at	35770_at	36994_at	34890_at	40872_at	39031_at	37930_at	38686_at	38814_at	34401_at	41206_r_at	35751_at	41223_at	34381_at	36565_at	36169_at	36523_at	39427_at	37395_at	39443_s_at	33875_at	36167_at	32959_at	283_at	36687_at	36165_at	33521_at	34889_at	40854_at	33854_at	38462_at	39326_at	32482_at	34826_at	32439_at
MAP00193_ATP_synthesis	GenMAPP	37948_at	37395_at	36167_at	33875_at	40568_at	33033_at	32959_at	37367_at	34889_at	35770_at	33854_at	36994_at	34890_at	39326_at	38686_at	38814_at
MAP00195_Photosynthesis	GenMAPP	37948_at	37395_at	36167_at	33875_at	40568_at	33033_at	32959_at	37367_at	40336_at	34889_at	35770_at	33854_at	36994_at	34890_at	39326_at	38686_at	38814_at
MAP00220_Urea_cycle_and_metabolism_of_amino_groups	GenMAPP	32486_at	683_at	37602_at	40862_i_at	37741_at	32647_at	1962_at	37592_at	40541_at	35111_at	34884_at	40863_r_at	36203_at	38792_at	37713_at	36636_at	36528_at	1081_at	37341_at	32722_at
MAP00230_Purine_metabolism	GenMAPP	32301_at	34953_i_at	34341_at	36489_at	34310_at	35032_at	39747_at	39073_at	1462_s_at	39766_r_at	886_at	36246_at	32302_g_at	37143_s_at	32625_at	34314_at	39056_at	37335_at	33705_at	38384_at	40925_at	32379_f_at	1248_at	36997_at	37640_at	32378_at	39746_at	430_at	40750_at	33463_at	41332_at	34686_at	39383_at	36107_at	33353_at	38463_s_at	33800_at	35631_at	38860_at	31812_at	38055_at	1521_at	33134_at	2062_at	40451_at	278_at	33167_r_at	41654_at
4_at	35841_at
MAP00240_Pyrimidine_metabolism	GenMAPP	39747_at	39073_at	32031_at	749_at	1462_s_at	38795_s_at	39766_r_at	886_at	34314_at	33815_at	37193_at	1248_at	39746_at	430_at	630_at	41332_at	35631_at	41400_at	38055_at	1521_at	2062_at	40451_at	1117_at	38368_at	1486_at	1470_at	631_g_at	32600_at	40450_at	38220_at	40232_at	36027_at	910_at	34828_at	32176_at	33195_at	1985_s_at	1014_at	32617_at	1594_at	1505_at	1980_s_at	38794_at	40791_at	32331_at	41422_at	36922_at	503_at
MAP00251_Glutamate_metabolism	GenMAPP	38386_r_at	33163_r_at	34341_at	40764_at	35130_at	36364_at	35300_at	32031_at	41790_at	749_at	36457_at	34884_at	33446_at	32279_at	37341_at	31850_at	41631_f_at	32280_at	40522_at	37183_at	35343_at	32626_at	35711_at	34430_at
MAP00252_Alanine_and_aspartate_metabolism	GenMAPP	41648_at	40764_at	36364_at	41241_at	36671_at	35480_at	32031_at	32280_at	749_at	40541_at	36185_at	39654_at	33446_at	32279_at	32615_at	38000_at	37183_at	35343_at	36528_at	33167_r_at	37880_at	39744_at	826_at	36639_at	34430_at
MAP00260_Glycine_serine_and_threonine_metabolism	GenMAPP	34849_at	36163_at	38090_at	36581_at	38474_at	37628_at	38473_at	41771_g_at	41770_at	37602_at	35192_at	37186_s_at	36582_g_at	34738_at	37674_at	35241_at	37594_at	34464_at	35593_at	33756_at	36178_at	37880_at	41772_at	40390_at	41120_at
MAP00272_Cysteine_metabolism	GenMAPP	32962_at	36124_at	40764_at	41485_at	33819_at	41092_at	40408_at	33820_g_at	35343_at	40390_at
MAP00280_Valine_leucine_and_isoleucine_degradation	GenMAPP	37015_at	37593_at	41142_at	34517_at	41682_s_at	36952_at	35345_at	37532_at	37016_at	37704_at	40105_at	40415_at	39741_at	41683_i_at	41684_at	31871_r_at	38425_at	37599_at	34118_at	32676_at	40409_at	36561_at	37342_s_at	32747_at	36432_at	39408_at	36417_s_at	38503_at	1348_s_at	41530_at
MAP00310_Lysine_degradation	GenMAPP	37015_at	31871_r_at	36184_at	36952_at	34118_at	1749_at	37016_at	34738_at	33257_at	40409_at	35870_at	33314_at	38339_at	32747_at	36178_at	33258_g_at	38503_at	39678_at	40470_at
MAP00330_Arginine_and_proline_metabolism	GenMAPP	262_at	37015_at	40764_at	36666_at	41770_at	683_at	37602_at	35300_at	40862_i_at	37741_at	37186_s_at	32647_at	1962_at	1965_s_at	34884_at	691_g_at	34464_at	36636_at	33756_at	1418_at	36528_at	37341_at	1419_g_at	34304_s_at	32486_at	36685_at	37628_at	41771_g_at	34118_at	1948_f_at	37037_at	1961_f_at	549_at	40409_at	37592_at	40541_at	35111_at	40863_r_at	36203_at	576_at	710_at	35593_at	38792_at	32747_at	263_g_at	35343_at	1081_at	36684_at
MAP00340_Histidine_metabolism	GenMAPP	37015_at	34744_at	40201_at	37628_at	41771_g_at	41770_at	40031_at	34118_at	35606_at	37240_at	37186_s_at	37956_at	40409_at	39654_at	40685_at	36686_at	35593_at	32747_at	33756_at	37604_at	41772_at	38503_at	40735_at
MAP00350_Tyrosine_metabolism	GenMAPP	34651_at	40764_at	32300_s_at	37206_at	41770_at	38927_i_at	37186_s_at	32352_at	32943_at	40685_at	31844_at	36686_at	34638_r_at	36876_at	37708_r_at	37707_i_at	33756_at	34637_f_at	35405_at	33529_at	40201_at	37628_at	37599_at	41771_g_at	36247_f_at	40031_at	37956_at	32701_at	33487_at	33519_at	35593_at	35730_at	35343_at	41772_at	38928_r_at
MAP00360_Phenylalanine_metabolism	GenMAPP	35405_at	40764_at	40201_at	37628_at	41771_g_at	40031_at	41770_at	37186_s_at	37956_at	34161_at	40685_at	33284_at	33487_at	36686_at	35593_at	35343_at	33756_at	41772_at
MAP00361_gamma_Hexachlorocyclohexane_degradation	GenMAPP	987_g_at	36623_at	38861_at	1338_s_at	38229_at	986_at	1755_i_at	1493_r_at	1555_f_at	1492_f_at	1455_f_at	1667_s_at	677_s_at	1756_f_at	1025_g_at	37125_f_at	617_at	38548_at	33523_at	1431_at	1554_f_at	1080_s_at	270_at	40379_at	36767_at	36651_at	1436_at	1517_at	1757_i_at	1758_r_at	1371_s_at	33389_at	37124_i_at	501_g_at	1619_g_at	1494_f_at	36611_at	38039_at	32705_at	1477_s_at	38507_at	1024_at	32200_at	1759_f_at	678_at	500_at
MAP00380_Tryptophan_metabolism	GenMAPP	987_g_at	1338_s_at	38606_at	38229_at	41770_at	1755_i_at	36952_at	1493_r_at	38493_at	1555_f_at	1492_f_at	37186_s_at	1455_f_at	1667_s_at	1756_f_at	1025_g_at	40670_at	38492_at	38548_at	1554_f_at	270_at	1517_at	33389_at	41771_g_at	38121_at	37124_i_at	501_g_at	1619_g_at	40409_at	38039_at	1477_s_at	38507_at	32747_at	1024_at	38503_at	39678_at	37015_at	986_at	36804_at	37016_at	37125_f_at	33756_at	36332_at	1431_at	1080_s_at	37009_at	40470_at	40379_at
MAP00410_beta_Alanine_metabolism	GenMAPP	37015_at	31871_r_at	36364_at	36952_at	41422_at	34118_at	32280_at	37186_s_at	37532_at	38220_at	37016_at	40409_at	33446_at	32279_at	35593_at	37183_at	38792_at	32747_at	33756_at	38503_at
MAP00480_Glutathione_metabolism	GenMAPP	38386_r_at	31850_at	32798_at	32332_at	33163_r_at	38042_at	39054_at	35130_at	33396_at	41631_f_at	1290_g_at	38781_at	35194_at	41868_at	1120_at	770_at	37222_at	829_s_at	1261_i_at	33931_at	1289_at	1099_s_at	1260_s_at	39023_at	37033_s_at	1121_g_at	556_s_at
MAP00500_Starch_and_sucrose_metabolism	GenMAPP	36372_at	40964_at	34509_at	37206_at	37215_at	37058_at	36667_at	39122_at	37373_at	40057_at	31816_at	36241_r_at	32210_at	38253_at	33069_f_at	38252_s_at	33519_at	35558_at	40682_at	37299_at	33308_at	33068_f_at	37807_at	32643_at
MAP00510_N_Glycans_biosynthesis	GenMAPP	40806_at	32772_s_at	39889_at	38464_at	35176_at	39888_at	40960_at	34177_at	37098_at	41628_at	39663_at	38791_at	34879_at	39778_at	39445_at	41352_at	345_at
MAP00530_Aminosugars_metabolism	GenMAPP	36372_at	39340_at	40964_at	39267_at	35419_g_at	41596_s_at	36668_at	32210_at	35418_at	31783_at	34888_at	36515_at	32626_at	37807_at
MAP00531_Glycosaminoglycan_degradation	GenMAPP	40592_at	39340_at	32101_at	40433_at	39450_s_at	39451_i_at	35419_g_at	33155_at	33156_at	36263_g_at	41596_s_at	37795_at	35418_at	32283_at	40550_at	40814_at	32282_at	34888_at	40432_at	37742_at	32100_r_at	33308_at	36262_at	40815_g_at
MAP00561_Glycerolipid_metabolism	GenMAPP	38090_at	37206_at	41022_r_at	39629_at	41209_at	37317_at	474_at	41369_at	41021_s_at	37708_r_at	37707_i_at	38129_at	33523_at	1204_at	35938_at	39225_at	614_at	912_s_at	33529_at	40409_at	39177_r_at	32716_at	32747_at	35730_at	37052_at	38503_at	39176_f_at	40372_at	36623_at	37015_at	35874_at	36833_at	32567_at	32449_at	34638_r_at	37742_at	35229_at	38130_s_at	34637_f_at	35386_at	33305_at	31636_s_at	36247_f_at	34255_at	35594_at	34118_at	36589_at	39285_at
MAP00562_Inositol_phosphate_metabolism	GenMAPP	39513_r_at	31699_at	39514_s_at	35924_at	36509_at	1082_at	33508_at	35741_at	39222_at	210_at	118_at	32697_at	33507_g_at	37180_at	36287_at	1085_s_at	37272_at	37596_at	34351_at	33506_at	38168_at	656_at	40783_s_at	36598_s_at	41715_at	40704_at	39512_s_at	41524_at
MAP00590_Prostaglandin_and_leukotriene_metabolism	GenMAPP	1350_at	912_s_at	33153_at	38773_at	37969_at	34636_at	38407_r_at	759_at	35523_at	1305_s_at	41868_at	39629_at	307_at	36533_at	216_at	33777_at	37017_at	35124_at	38406_f_at	38081_at	35938_at	38172_at	614_at
MAP00600_Sphingoglycolipid_metabolism	GenMAPP	40376_at	39340_at	39075_at	32631_at	36938_at	35419_g_at	461_at	38212_at	37963_at	40215_at	36833_at	32632_g_at	35418_at	34888_at	40889_at	37742_at	41568_at	35944_at	40214_at	38565_at
MAP00602_Blood_group_glycolipid_biosynthesis_neolact_series	GenMAPP	34469_at	40337_at	32772_s_at	39889_at	39888_at	40960_at	34177_at	37098_at	33099_at	38495_s_at	36289_f_at	35033_at	39445_at	41352_at	36290_s_at
MAP00603_Globoside_metabolism	GenMAPP	39340_at	35418_at	33099_at	40337_at	34888_at	38495_s_at	35419_g_at	36289_f_at	40290_f_at	40291_r_at	36833_at	36290_s_at	36607_at
MAP00620_Pyruvate_metabolism	GenMAPP	31530_at	37015_at	41485_at	38528_at	38529_at	33819_at	38638_at	31824_at	36608_at	33703_f_at	36221_at	40120_at	40133_s_at	837_s_at	33644_at	38000_at	40925_at	37708_r_at	32379_f_at	37707_i_at	39160_at	32378_at	31531_g_at	35216_at	36201_at	36163_at	33702_f_at	41092_at	34118_at	33013_at	36589_at	40409_at	39001_at	36599_at	32747_at	39041_at	33820_g_at	33334_at	38503_at	39678_at
MAP00630_Glyoxylate_and_dicarboxylate_metabolism	GenMAPP	673_at	39001_at	40133_s_at	40077_at	41314_at	40074_at	36608_at	35891_at	160044_g_at	674_g_at
MAP00640_Propanoate_metabolism	GenMAPP	31530_at	37015_at	37593_at	31871_r_at	41485_at	38528_at	38529_at	33819_at	41092_at	36364_at	36952_at	34118_at	37532_at	32676_at	37016_at	40409_at	40105_at	33446_at	36561_at	32747_at	33820_g_at	38503_at	1348_s_at	31531_g_at	39678_at
MAP00650_Butanoate_metabolism	GenMAPP	37015_at	37211_at	31871_r_at	41142_at	38425_at	38638_at	34517_at	36364_at	36952_at	35345_at	34118_at	32280_at	41790_at	37016_at	33013_at	40409_at	33446_at	32279_at	37183_at	32747_at	39408_at	39160_at	38503_at	39678_at
MAP00670_One_carbon_pool_by_folate	GenMAPP	38383_at	40074_at	38316_at	38811_at	34738_at	673_at	37913_at	38384_at	36178_at	41120_at	37899_at	1505_at	674_g_at
MAP00710_Carbon_fixation	GenMAPP	35216_at	40764_at	31824_at	36608_at	36495_at	40293_at	40107_at	37677_at	39001_at	837_s_at	33644_at	40925_at	32379_f_at	35343_at	33455_at	32336_at	31488_s_at	32378_at	34430_at
MAP00790_Folate_biosynthesis	GenMAPP	37263_at	260_at	36623_at	673_at	37944_at	37913_at	36923_at	33523_at	678_at	35697_at	37899_at	1505_at	674_g_at
MAP00860_Porphyrin_and_chlorophyll_metabolism	GenMAPP	37916_at	36653_g_at	37206_at	36652_at	37058_at	35300_at	33914_r_at	38943_at	40336_at	33069_f_at	39008_at	37002_at	33519_at	33802_at	37649_at	37667_at	34506_at	33308_at	33068_f_at	32618_at	37999_at
MAP00910_Nitrogen_metabolism	GenMAPP	32962_at	32296_at	40739_at	35636_at	40309_at	35051_at	36454_at	39241_at	39922_at	36671_at	37624_at	40095_at	40522_at	40374_at	34884_at	39492_at	39744_at	826_at	37341_at	34572_at	35711_at	41120_at	40735_at
MAP00970_Aminoacyl_tRNA_biosynthesis	GenMAPP	34849_at	34744_at	36581_at	38473_at	41241_at	40408_at	38121_at	35300_at	40827_at	34336_at	37240_at	36582_g_at	35241_at	549_at	36185_at	32615_at	39342_at
MAP03020_RNA_polymerase	GenMAPP	39746_at	41332_at	40791_at	32600_at	39747_at	503_at	39766_r_at	35631_at	38055_at	40232_at	36027_at	34828_at	2062_at	1248_at	32176_at	1486_at	35841_at	1594_at
MAP03070_Type_III_secretion_system	GenMAPP	37948_at	37395_at	36167_at	33875_at	40568_at	33033_at	32959_at	37367_at	34889_at	35770_at	33854_at	36994_at	34890_at	39326_at	38686_at	38814_at
MAPK_Cascade	GO	38742_s_at	364_s_at	1622_at	183_at	1000_at	2014_s_at	220_r_at	32583_at	1539_at	219_i_at	35422_at	2075_s_at	35817_at	1781_at	33009_at	2004_at	1917_at	41444_at	1543_at	1845_at	38338_at	1671_s_at	1130_at	38743_f_at	1844_s_at	40306_at	1330_at	37733_at	976_s_at	33275_at	1707_g_at	36910_at	1709_g_at	1712_s_at	1879_at	1708_at	1654_at	1706_at	1972_s_at
MAPKKK_cascade	GO	2056_at	36180_s_at	36168_at	1788_s_at	1327_s_at	1330_at	31805_at	32401_at	39933_at	1439_s_at	39932_at	2057_g_at	424_s_at	36179_at	41193_at
mapkPathway	BioCarta	36926_at	32859_at	1991_s_at	1377_at	41747_s_at	32519_at	1565_s_at	865_at	1378_g_at	1699_at	32583_at	1262_s_at	33166_at	41161_at	37724_at	1781_at	1558_g_at	1045_s_at	1461_at	2004_at	1729_at	1559_at	37946_at	422_s_at	41230_at	1295_at	1130_at	36278_at	160039_at	974_at	1330_at	1735_g_at	37575_at	37733_at	976_s_at	32026_s_at	1707_g_at	1712_s_at	33229_at	41374_at	40033_at	38902_r_at	1156_at	971_s_at	35960_at	34745_at	38742_s_at	33855_at
0_g_at	33784_at	33338_at	34006_s_at	1708_at	34329_at	37712_g_at	36180_s_at	32550_r_at	41445_at	2014_s_at	36645_at	1830_s_at	1439_s_at	187_at	1127_at	2075_s_at	1698_g_at	37535_at	1560_g_at	35652_g_at	1917_at	32903_at	1637_at	41444_at	35651_at	2050_s_at	1845_at	37711_at	33339_g_at	1671_s_at	1010_at	1973_s_at	34521_at	33325_at	38743_f_at	1957_s_at	41404_at	33275_at	1916_s_at	35694_at	1709_g_at	33770_at	1245_i_at	36179_at	38438_at	1557_at	35617_at	1891_at	40864_at
Matrix_Metalloproteinases	BioCarta	39632_at	31859_at	1693_s_at	35401_s_at	40055_s_at	437_at	31340_at	160037_at	1509_at	160020_at	35911_r_at	32924_at	668_s_at	40759_at	1034_at	1852_at	1167_s_at	1510_g_at	34722_at	1006_at	1482_g_at	681_at	819_at	39007_at	1035_g_at	36162_at	1375_s_at	34747_at	1481_at	259_s_at	38181_at	35910_f_at
mcalpainPathway	BioCarta	1590_s_at	1000_at	33908_at	36117_at	227_g_at	120_at	41768_at	32808_at	32166_at	36215_at	40103_at	37221_at	116_at	35701_at	31737_at	32847_at	1091_at	36359_at	34077_at	976_s_at	36138_at	37327_at	2055_s_at	1537_at	38905_at	37001_at	1542_at	226_at	37484_at	36640_at
mef2dPathway	BioCarta	39780_at	33896_at	41144_g_at	40075_at	39144_at	1158_s_at	1336_s_at	911_s_at	35434_at	41143_at	281_s_at	41287_s_at	551_at	432_s_at	39143_at	38277_at	32540_at	34368_at	160029_at	32541_at	36138_at	476_s_at	31710_at	41288_at	1217_g_at	1437_at	37001_at	37301_at	32304_at	40566_at	38771_at	37652_at
metPathway	BioCarta	2009_at	32519_at	1565_s_at	2070_i_at	36240_at	32583_at	1870_at	138_at	1340_s_at	1249_at	1781_at	35373_at	1558_g_at	32979_at	772_at	37638_at	415_at	36935_at	38219_at	35701_at	1848_at	1130_at	1131_at	1844_s_at	33524_at	38756_at	35301_at	38904_at	976_s_at	35684_at	34006_s_at	1269_at	40146_at	37484_at	39708_at	38742_s_at	33855_at	1590_s_at	39553_at	1000_at	289_at	36117_at	33997_at	120_at	1871_g_at	1915_s_at	33260_at	32808_at
mitochondriaPathway	BioCarta	37227_at	36578_at	2060_at	1717_s_at	32212_at	2066_at	33775_s_at	2011_s_at	31491_s_at	32047_at	1847_s_at	486_at	2067_f_at	34742_at	33286_at	1615_at	35662_at	33774_at	1998_i_at	487_g_at	1687_s_at	1997_s_at	32725_at	38281_at	1910_s_at	32726_g_at	36143_at	846_s_at	34937_at	1909_at	2065_s_at	35818_at	2038_g_at
mitrPathway	BioCarta	37710_at	37711_at	41747_s_at	37712_g_at	37483_at	35434_at	1424_s_at	37691_at	32863_at	33482_at	251_at
monocytePathway	BioCarta	38547_at	31616_r_at	40493_at	40366_at	32640_at	265_s_at	37398_at	35731_at	31615_i_at	31472_s_at	37918_at	1126_s_at	2055_s_at	38534_at	37397_at	2036_s_at	245_at	38533_s_at	32808_at	2061_at
mprPathway	BioCarta	37450_r_at	1590_s_at	33341_at	1000_at	32188_at	227_g_at	40421_at	935_at	37448_s_at	1127_at	41768_at	33324_s_at	36772_at	35580_at	40915_r_at	31604_at	1945_at	36215_at	34736_at	37221_at	116_at	35701_at	31737_at	1803_at	33353_at	32189_g_at	1091_at	36359_at	38904_at	976_s_at	33809_at	38905_at	37449_i_at	1584_at	32187_at	226_at	1938_at
mRNA_binding_activity	BioCarta	38094_at	38450_at	36913_at	41765_at	32595_at	37995_s_at	37994_at	1199_at	39384_at	36234_at	39346_at
mRNA_processing	BioCarta	39423_f_at	36112_r_at	140_s_at	40269_at	36517_at	37334_at	40638_at	39346_at	40593_at	34716_at	38040_at	39053_at	41363_at	33207_at	34717_s_at	35757_at	36111_s_at	40875_s_at	34270_at	36991_at	36225_s_at	34683_at	39792_at	38399_at	38527_at	35753_at	36099_at	39017_at	38829_r_at	36224_g_at	34987_s_at	40380_at	32557_at	36223_at	40211_at	35306_at	34733_at	32556_at	32753_at	35258_f_at	35259_s_at	32165_at	40453_s_at	39142_at	39009_at	36098_at	32183_at	37379_at
mRNA_splicing	BioCarta	36112_r_at	41370_at	32559_s_at	140_s_at	37585_at	37507_i_at	40269_at	36517_at	40638_at	37506_at	37337_at	41737_at	40465_at	40593_at	37508_f_at	35382_at	38040_at	39053_at	37936_at	36111_s_at	40875_s_at	37949_at	37463_r_at	36991_at	36225_s_at	34842_at	37481_at	32560_s_at	37462_i_at	38399_at	33797_at	32674_at	38527_at	33752_at	35753_at	37385_at	37935_at	38456_s_at	39017_at	35490_at	38829_r_at	35231_at	36224_g_at	40150_at	36223_at	38675_at	34733_at	35270_at
mrpPathway	BioCarta	38261_at	1576_g_at	34384_at	31398_at	33396_at	1930_at	34017_s_at	1682_s_at	33978_at	1896_s_at	34016_s_at	1575_at	829_s_at
mspPathway	BioCarta	39402_at	1520_s_at	882_at	1317_at	874_at	1852_at	1047_s_at	34375_at	875_g_at	259_s_at
mta3Pathway	BioCarta	33669_at	239_at	38875_r_at	541_g_at	1643_g_at	35905_s_at	39482_at	AFFX-HUMGAPDH/M33197_M_at	1681_at	38350_f_at	38633_at	AFFX-HUMGAPDH/M33197_3_at	AFFX-HUMGAPDH/M33197_5_at	1642_at	36785_at	AFFX-HUMGAPDH/M33197_3_st	32027_at	540_at	36591_at	685_f_at	32336_at	40567_at	AFFX-HUMGAPDH/M33197_5_st	AFFX-HUMGAPDH/M33197_M_st
mtorPathway	BioCarta	35299_at	39553_at	267_at	1199_at	237_s_at	1420_s_at	37752_at	38845_at	2037_s_at	32599_at	1306_at	32785_at	35373_at	39110_at	32029_at	31597_r_at	40704_at	37946_at	1564_at	33907_at	880_at	1434_at	40139_at	35125_at	33181_at	238_at	41785_at	38813_at	36234_at	1269_at	38844_at	39552_at	32844_at
muscle_myosin	BioCarta	40158_r_at	34595_at	32582_at	774_g_at	40157_s_at	33447_at	39095_at	34471_at	41730_at	34881_at	38602_at	39145_at	40062_s_at	40773_at	37407_s_at	41731_g_at	33994_g_at	773_at
myosinPathway	BioCarta	810_at	33635_at	33341_at	32847_at	1336_s_at	34925_at	160029_at	38580_at	35980_at	2029_at	34735_at	1217_g_at	1139_at	1437_at	36772_at	37301_at	38581_at	41137_at	39927_at	32304_at	40566_at	34106_at	36640_at	175_s_at
ndkDynaminPathway	BioCarta	32728_at	39780_at	41144_g_at	32238_at	39073_at	459_s_at	40075_at	1158_s_at	32138_at	911_s_at	41143_at	1985_s_at	281_s_at	41287_s_at	37731_at	1980_s_at	38277_at	37685_at	41692_at	32540_at	32541_at	1521_at	41288_at	39795_at	33415_at	36532_at
neutrophilPathway	BioCarta	38547_at	31616_r_at	40493_at	32640_at	265_s_at	37398_at	31615_i_at	31472_s_at	37918_at	1126_s_at	38534_at	37397_at	2036_s_at	245_at	38533_s_at
nfatPathway	BioCarta	250_at	39780_at	2070_i_at	249_at	1253_at	39101_at	1158_s_at	39144_at	227_g_at	2037_s_at	37710_at	1828_s_at	41143_at	33514_at	35373_at	34241_at	38037_at	1752_at	41287_s_at	40822_at	39143_at	37946_at	1564_at	35701_at	38277_at	1130_at	1844_s_at	1421_at	37370_i_at	684_at	32540_at	36359_at	37733_at	976_s_at	38905_at	41288_at	238_at	41806_at	34006_s_at	32863_at	1269_at	33831_at	38742_s_at	33570_at	37712_g_at	1590_s_at	1422_g_at	41144_g_at
nfkbPathway	BioCarta	1377_at	1209_at	38369_at	38755_at	36645_at	1368_at	1378_g_at	33166_at	1563_s_at	595_at	33009_at	1045_s_at	1461_at	1100_at	1583_at	2004_at	1729_at	36004_at	1295_at	40696_at	36905_at	974_at	1852_at	35634_at	33813_at	33770_at	38438_at	1271_g_at	475_at	259_s_at	35960_at
ngfPathway	BioCarta	38742_s_at	33855_at	1565_s_at	38118_at	38725_s_at	2070_i_at	1590_s_at	1082_at	1000_at	32583_at	594_s_at	1673_at	40258_at	34351_at	41721_at	1915_s_at	1781_at	33260_at	35373_at	1917_at	40704_at	38726_at	35701_at	790_at	1130_at	2094_s_at	791_g_at	38743_f_at	1844_s_at	217_at	33275_at	1916_s_at	34006_s_at	1269_at	2071_s_at	36235_at
nkcellsPathway	BioCarta	2050_s_at	2009_at	34481_at	40688_at	1130_at	794_at	428_s_at	1000_at	1844_s_at	548_s_at	32297_s_at	33804_at	36885_at	41237_at	34644_at	1919_at	2055_s_at	35533_f_at	33531_at	1557_at	201_s_at	35532_i_at	35373_at	1558_g_at	32808_at	1269_at	40864_at	1165_at	40704_at
nktPathway	BioCarta	1128_s_at	856_at	32861_s_at	34021_at	1538_s_at	33945_at	41445_at	1066_at	40702_at	AFFX-MurIL4_at	33981_at	36674_at	1262_s_at	1830_s_at	35517_at	563_at	39994_at	36377_at	39937_at	436_at	1021_at	41140_at	1611_s_at	1038_s_at	1401_g_at	1735_g_at	34077_at	1767_s_at	404_at	1574_s_at	33098_at	649_s_at	1097_s_at	1534_at	390_at	1400_at	33955_at	39938_g_at	971_s_at
no1Pathway	BioCarta	36100_at	33536_at	1964_g_at	990_at	34650_at	39748_at	41144_g_at	32316_s_at	38486_at	40075_at	227_g_at	1158_s_at	1953_at	38263_at	911_s_at	991_g_at	41768_at	41143_at	36274_at	36215_at	41287_s_at	34143_at	37221_at	1564_at	116_at	1545_g_at	31737_at	403_s_at	39309_at	1091_at	36119_at	36258_at	1961_f_at	35872_at	31904_at	36359_at	38905_at	41288_at	576_at	36101_s_at	39310_at	1963_at	226_at	690_s_at	1567_at	1954_at
no2il12Pathway	BioCarta	1419_g_at	856_at	37468_at	1066_at	38319_at	1948_f_at	39226_at	40702_at	1021_at	1611_s_at	34077_at	35517_at	563_at	37078_at	993_at	1418_at	40738_at	36277_at	1534_at	33955_at	906_at
nos1Pathway	BioCarta	39780_at	37135_f_at	41144_g_at	38236_at	41539_at	40075_at	41538_r_at	227_g_at	1158_s_at	1336_s_at	37134_f_at	1965_s_at	911_s_at	41768_at	41143_at	281_s_at	36215_at	41287_s_at	31711_at	37221_at	116_at	34701_at	38277_at	1091_at	32540_at	160029_at	36359_at	32541_at	32489_at	41288_at	38905_at	1217_g_at	1437_at	37301_at	226_at	32304_at	40566_at
nthiPathway	BioCarta	1377_at	36953_at	1520_s_at	38369_at	33896_at	1622_at	2014_s_at	36645_at	1433_g_at	1378_g_at	39402_at	1814_at	2075_s_at	1102_s_at	1045_s_at	1461_at	38944_at	32903_at	551_at	1543_at	1454_at	1295_at	1671_s_at	1010_at	1005_at	1957_s_at	36905_at	974_at	1852_at	1815_g_at	36690_at	509_at	37733_at	40310_at	510_g_at	33770_at	38438_at	35372_r_at	1271_g_at	40033_at	33831_at	259_s_at	35960_at
p27Pathway	BioCarta	37757_at	33848_r_at	41759_at	1570_f_at	2044_s_at	37347_at	39723_at	2010_at	1670_at	33781_s_at	1322_at	39724_s_at	1792_g_at	1833_at	1695_at	2028_s_at	1941_at	2034_s_at	41060_at	39449_at	33847_s_at	2021_s_at	1571_f_at	1672_f_at	33782_r_at	1900_at
p35alzheimersPathway	BioCarta	41136_s_at	493_at	33908_at	310_s_at	1253_at	237_s_at	40184_at	40645_at	40549_at	36949_at	36138_at	33181_at	38629_at	114_r_at	1206_at	800_g_at	36273_at	799_at	113_i_at
p38mapkPathway	BioCarta	32859_at	41747_s_at	1565_s_at	541_g_at	37710_at	1262_s_at	33166_at	41161_at	1754_at	37724_at	1781_at	35938_at	2004_at	1729_at	40192_at	422_s_at	35701_at	40696_at	1827_s_at	36905_at	1735_g_at	37575_at	37733_at	1767_s_at	32026_s_at	32860_g_at	33784_at	1712_s_at	33338_at	38902_r_at	971_s_at	34745_at	33855_at	37712_g_at	38118_at	41506_at	35299_at	1590_s_at	36180_s_at	41445_at	2014_s_at	877_at	1830_s_at	41507_at	1439_s_at	35434_at	540_at	33009_at
p53_signalling	BioCarta	1682_s_at	1575_at	1576_g_at	31737_at	37227_at	2025_s_at	2001_g_at	2000_at	1863_s_at	37229_at	35897_r_at	38682_at	1997_s_at	2065_s_at	2067_f_at	2066_at	1998_i_at	1700_at	1909_at	2038_g_at	2060_at	1910_s_at	1847_s_at	35500_at	33724_at	1993_s_at	604_at	486_at	487_g_at	36086_at	1924_at	1803_at	33324_s_at	40915_r_at	33317_at	1969_s_at	2031_s_at	1713_s_at	38920_at	37887_at	33831_at	40258_at	36235_at	594_s_at	37629_at	32843_s_at	410_s_at	239_at
at	566_at	33667_at	1437_at	40566_at	32304_at	38949_at	2081_s_at	40129_at	2012_s_at	1250_at	1675_at	36935_at	1570_f_at	2044_s_at	1900_at	1571_f_at	1672_f_at	1271_g_at	36645_at	1045_s_at	1295_at	35119_at	862_at	863_g_at	33322_i_at	33323_r_at	1156_at	40458_at	506_s_at	41441_at	35380_at	867_s_at	115_at	32520_at	616_s_at	1316_at	35846_at	259_s_at	1852_at	36988_at	34892_at	1858_at	1851_s_at	1974_s_at	33749_at	1860_at	34822_at	31791_at	848_at
p53hypoxiaPathway	BioCarta	37172_at	1576_g_at	1863_s_at	41065_at	2070_i_at	33896_at	2066_at	493_at	32316_s_at	1859_s_at	1682_s_at	38066_at	752_s_at	2001_g_at	2067_f_at	551_at	1564_at	32965_f_at	37319_at	1880_at	34626_at	1998_i_at	38481_at	38422_s_at	1974_s_at	1997_s_at	2008_s_at	40184_at	2031_s_at	1586_at	1039_s_at	36949_at	2000_at	34006_s_at	1911_s_at	2071_s_at	2065_s_at	1575_at	38509_at	1382_at
p53Pathway	BioCarta	37227_at	2060_at	1863_s_at	1570_f_at	2066_at	2044_s_at	1859_s_at	1833_at	2001_g_at	1847_s_at	1824_s_at	2021_s_at	2067_f_at	1571_f_at	2020_at	1880_at	1998_i_at	1034_at	1974_s_at	1997_s_at	2008_s_at	2031_s_at	2017_s_at	1322_at	1792_g_at	2028_s_at	41060_at	1910_s_at	2000_at	1035_g_at	1884_s_at	1942_s_at	1909_at	1672_f_at	1911_s_at	2065_s_at	38418_at	38509_at	1900_at	2038_g_at
par1Pathway	BioCarta	810_at	2009_at	35571_at	33341_at	1336_s_at	38580_at	35980_at	41700_at	37202_at	36772_at	35580_at	35373_at	41137_at	40704_at	33635_at	33353_at	36905_at	33804_at	34925_at	160029_at	34735_at	33809_at	1217_g_at	1139_at	1437_at	1394_at	37301_at	38581_at	1269_at	32304_at	40566_at	34106_at	37309_at
parkinPathway	BioCarta	155_s_at	37662_at	223_at	33019_at	40505_at	34297_at	32236_at	38701_at	457_s_at	1423_at	40632_at	37291_r_at	34412_s_at
pdgfPathway	BioCarta	32859_at	38742_s_at	33855_at	38118_at	1565_s_at	2070_i_at	1731_at	1590_s_at	1082_at	1000_at	289_at	1409_at	40458_at	1336_s_at	32583_at	594_s_at	40258_at	34351_at	1457_at	1915_s_at	33260_at	1781_at	35373_at	33009_at	506_s_at	2004_at	40704_at	1917_at	36935_at	1845_at	33339_g_at	1675_at	35701_at	1130_at	2094_s_at	38743_f_at	1844_s_at	1987_at	1968_g_at	40109_at	160029_at	33275_at	41594_at	1916_s_at	36910_at	1988_at	32860_g_at	1712_s_at
pelp1Pathway	BioCarta	976_s_at	33669_at	32455_s_at	33896_at	1000_at	1681_at	33831_at	1938_at	551_at	38904_at
pgc1aPathway	BioCarta	31813_at	39780_at	41747_s_at	37712_g_at	1422_g_at	41144_g_at	1424_s_at	251_at	40075_at	1158_s_at	1487_at	37710_at	911_s_at	35434_at	41143_at	33514_at	281_s_at	38810_at	32105_f_at	41287_s_at	32104_i_at	37711_at	39388_at	38277_at	650_s_at	929_at	1421_at	32540_at	32541_at	41288_at	37076_at	37691_at	32863_at	34846_at	34847_s_at
pitx2Pathway	BioCarta	33896_at	32064_at	1253_at	163_at	33319_at	40645_at	41014_s_at	40777_at	1912_s_at	38300_at	36182_at	476_s_at	35433_s_at	36021_at	465_at	33810_at	1853_at	35160_at	33831_at	38771_at	551_at
pkcPathway	BioCarta	1377_at	1295_at	36645_at	1336_s_at	1378_g_at	160029_at	38580_at	35980_at	38438_at	1217_g_at	1437_at	1271_g_at	1045_s_at	37301_at	38581_at	1461_at	32304_at	40566_at
plcdPathway	BioCarta	37596_at	32983_at	1217_g_at	1437_at	38404_at	231_at	37301_at	1336_s_at	32304_at	40566_at	160029_at
plcePathway	BioCarta	37221_at	116_at	37450_r_at	31696_at	33353_at	1091_at	227_g_at	38209_at	36359_at	40330_at	610_at	37448_s_at	38905_at	37449_i_at	41768_at	35580_at	31604_at	226_at	36215_at
plcPathway	BioCarta	1564_at	34481_at	1082_at	1336_s_at	160029_at	35980_at	1919_at	34351_at	1217_g_at	1437_at	35373_at	37301_at	1269_at	32304_at	40566_at	40704_at
plk3Pathway	BioCarta	37229_at	37887_at	1863_s_at	2001_g_at	2000_at	1424_s_at	1584_at	38920_at	1974_s_at	806_at
pmlPathway	BioCarta	37643_at	1570_f_at	37354_at	37644_s_at	AFFX-MurFAS_at	1590_s_at	2044_s_at	37353_g_at	566_at	1337_s_at	1441_s_at	1563_s_at	41161_at	1754_at	38900_at	457_s_at	1571_f_at	38787_at	567_s_at	1344_at	1583_at	155_s_at	1808_s_at	35701_at	37352_at	1974_s_at	1851_s_at	1852_at	1440_s_at	33813_at	389_s_at	1345_s_at	1672_f_at	1858_at	33831_at	259_s_at	1900_at
pparaPathway	BioCarta	32064_at	33106_at	227_g_at	40458_at	1336_s_at	32583_at	39722_at	41209_at	837_s_at	33644_at	643_at	37724_at	472_at	35373_at	1571_f_at	1045_s_at	506_s_at	1461_at	40459_at	551_at	1419_g_at	1295_at	40454_at	1827_s_at	40088_at	1005_at	39294_at	160029_at	36359_at	976_s_at	484_at	38905_at	39106_at	473_g_at	1672_f_at	1269_at	38368_at	32304_at	33831_at	259_s_at	1156_at	1900_at	39359_s_at	1570_f_at	33896_at	2044_s_at	33869_at	31824_at
ppargPathway	BioCarta	34313_at	33896_at	32064_at	41209_at	484_at	32800_at	34312_at	405_at	33831_at	36118_at	551_at	37104_at
Proteasome_Degradation	BioCarta	35353_at	34079_at	39749_at	504_at	1450_g_at	40702_at	39155_at	419_at	32078_at	37766_s_at	1166_at	1313_at	1449_at	32848_at	1184_at	1268_at	32240_at	941_at	1294_at	34570_at	1312_at	949_s_at	1314_at	592_at	1231_at	37826_at	38705_at	418_at	38371_at	1021_at	1611_s_at	32584_at	39060_at	41171_at	40195_at	688_at	38287_at	36122_at	32335_r_at	832_at	39083_at	33449_at	32334_f_at	39337_at
proteasomePathway	BioCarta	34079_at	1309_at	1446_at	1450_g_at	1193_at	1311_at	1194_g_at	1313_at	1449_at	37666_at	1268_at	941_at	1447_at	36676_at	1448_at	592_at	41205_at	1310_at	38371_at	39060_at	890_at	33247_at	36122_at	33449_at	33154_at	41240_at	33424_at	37046_at
ps1Pathway	BioCarta	35658_at	40818_at	641_at	1226_at	1253_at	34639_at	163_at	33319_at	40645_at	40777_at	642_s_at	1912_s_at	38300_at	1227_g_at	36182_at	39305_at	35433_s_at	34640_at	39303_at	39304_g_at	1853_at
ptc1Pathway	BioCarta	33317_at	38214_at	38387_at	1803_at	36086_at	37729_at	1688_s_at	31724_at	1738_at	1347_at	1924_at	33324_s_at	836_at	35407_at	1584_at	40915_r_at	1945_at	1969_s_at	34736_at
ptdinsPathway	BioCarta	417_at	632_at	36110_at	1861_at	1082_at	33987_at	1253_at	2037_s_at	32891_at	39627_at	34351_at	32029_at	32616_at	600_at	37946_at	1564_at	2050_s_at	1402_at	2024_s_at	36196_at	40116_at	1704_at	39175_at	362_at	40645_at	238_at	39795_at	40864_at	38213_at
ptenPathway	BioCarta	33848_r_at	33855_at	1565_s_at	38118_at	39553_at	1000_at	36117_at	38845_at	35365_at	2034_s_at	33260_at	35373_at	32029_at	32808_at	40704_at	1564_at	34740_at	1851_s_at	1434_at	976_s_at	2055_s_at	33847_s_at	1269_at	1858_at	38844_at	39552_at
pyk2Pathway	BioCarta	38742_s_at	2009_at	33855_at	32519_at	1565_s_at	38118_at	2070_i_at	1590_s_at	1082_at	1622_at	41144_g_at	1000_at	40075_at	1158_s_at	1336_s_at	32583_at	38580_at	911_s_at	34351_at	2075_s_at	41143_at	33260_at	1558_g_at	33009_at	2004_at	1917_at	41287_s_at	415_at	2050_s_at	1845_at	35701_at	1671_s_at	1130_at	1131_at	38743_f_at	1844_s_at	33524_at	33804_at	35301_at	160029_at	37733_at	38904_at	976_s_at	36910_at	41288_at	1712_s_at	1217_g_at	1437_at
rabPathway	BioCarta	39628_at	35339_at	620_at	36110_at	34392_s_at	31737_at	36660_at	32581_at	621_at	809_at	622_at	34393_r_at	34159_at	35304_at	1074_at	35340_at	40669_at	39244_at	623_s_at	600_at
rac1Pathway	BioCarta	34481_at	1731_at	40512_at	33659_at	40549_at	2037_s_at	1206_at	41038_at	35373_at	1558_g_at	800_g_at	33009_at	36628_at	36273_at	41137_at	2004_at	40704_at	37946_at	2050_s_at	40581_at	37190_at	40792_s_at	32847_at	1987_at	1968_g_at	36193_at	34925_at	1015_s_at	1988_at	1919_at	238_at	36157_at	1557_at	177_at	1269_at	40864_at	799_at	36640_at
raccycdPathway	BioCarta	33848_r_at	38742_s_at	1377_at	1570_f_at	1590_s_at	2044_s_at	1000_at	36645_at	1378_g_at	1833_at	2034_s_at	1207_at	35373_at	2021_s_at	1571_f_at	1558_g_at	1045_s_at	1461_at	2020_at	40704_at	1917_at	37757_at	1564_at	2050_s_at	41545_at	35701_at	1295_at	38743_f_at	1670_at	2031_s_at	2017_s_at	1322_at	976_s_at	1792_g_at	2028_s_at	38438_at	41060_at	1557_at	33847_s_at	1394_at	1271_g_at	1942_s_at	1672_f_at	1269_at	40864_at	38418_at	1900_at	41546_at
radiation_sensitivity	BioCarta	37643_at	34718_at	2060_at	1863_s_at	1570_f_at	37644_s_at	AFFX-MurFAS_at	1590_s_at	2066_at	2044_s_at	1859_s_at	35905_s_at	39482_at	32318_s_at	AFFX-HUMGAPDH/M33197_M_at	574_s_at	AFFX-HUMGAPDH/M33197_5_at	1441_s_at	1335_at	2001_g_at	AFFX-HSAC07/X00351_5_st	33324_s_at	1847_s_at	40915_r_at	AFFX-HSAC07/X00351_3_st	2021_s_at	2067_f_at	1571_f_at	32263_at	AFFX-HSAC07/X00351_M_st	AFFX-HUMGAPDH/M33197_5_st	AFFX-HUMGAPDH/M33197_M_st	38914_at	37319_at	1808_s_at	1880_at	AFFX-HSAC07/X00351_M_at	35701_at	36650_at	1998_i_at	1803_at	1974_s_at	1851_s_at	1795_g_at	1997_s_at	2008_s_at	AFFX-HSAC07/X00351_5_at	1440_s_at
ranklPathway	BioCarta	32479_at	1377_at	1209_at	1295_at	2070_i_at	2094_s_at	40268_at	36645_at	1378_g_at	32271_at	1916_s_at	1214_s_at	38438_at	1915_s_at	34006_s_at	1588_at	35107_at	1271_g_at	1045_s_at	2071_s_at	1157_s_at	38517_at
rarrxrPathway	BioCarta	1070_at	34313_at	37380_at	39359_s_at	40791_at	37381_g_at	1885_at	1012_at	39358_at	31709_at	37882_at	41441_at	32800_at	484_at	1337_s_at	34312_at	33381_at	35495_at	405_at	36826_at	36118_at	35821_at
rasPathway	BioCarta	38742_s_at	1377_at	1590_s_at	1861_at	1000_at	36645_at	1378_g_at	36238_at	486_at	1781_at	35373_at	34742_at	1045_s_at	36628_at	40704_at	1917_at	1615_at	40192_at	1564_at	2050_s_at	34254_at	39736_at	35701_at	1295_at	1130_at	487_g_at	38743_f_at	1844_s_at	33275_at	39253_s_at	33770_at	38438_at	177_at	1394_at	1271_g_at	1269_at	40864_at	37309_at
rbPathway	BioCarta	1863_s_at	1570_f_at	2044_s_at	1424_s_at	38920_at	1803_at	1974_s_at	2033_s_at	32189_g_at	32188_at	1738_at	1833_at	1792_g_at	1347_at	2001_g_at	2000_at	33324_s_at	36909_at	35407_at	1584_at	40915_r_at	1571_f_at	1942_s_at	1672_f_at	32187_at	1900_at
reckPathway	BioCarta	31859_at	35234_at	1693_s_at	819_at	35701_at	1590_s_at	39007_at	35236_g_at	1035_g_at	1375_s_at	34747_at	35235_at	1034_at	160020_at	34722_at
reelinPathway	BioCarta	32398_s_at	40480_s_at	2039_s_at	40012_at	1206_at	800_g_at	37530_s_at	36273_at	799_at	36873_at	40479_at	40549_at	40481_r_at
relaPathway	BioCarta	1377_at	36004_at	1209_at	1295_at	40696_at	33896_at	38755_at	1852_at	36645_at	1378_g_at	33813_at	33166_at	1563_s_at	33770_at	38438_at	1271_g_at	1045_s_at	1461_at	475_at	1583_at	33831_at	1729_at	259_s_at	35960_at	551_at	35821_at
rhoPathway	BioCarta	553_g_at	810_at	31451_at	37760_at	35734_at	39700_at	35810_at	32463_at	33659_at	38815_at	31833_at	34691_f_at	38758_at	38445_at	34692_r_at	33920_at	35271_at	32462_s_at	36675_r_at	41137_at	32166_at	37253_at	39281_at	39413_at	39649_at	32847_at	34925_at	37761_at	1015_s_at	36601_at	39043_at	38904_at	1718_at	32612_at	2029_at	34735_at	552_at	35733_at	35673_at	40154_at	1394_at	39927_at	1938_at	36640_at	37309_at
rnaPathway	BioCarta	1377_at	39368_at	33770_at	1295_at	38438_at	33208_at	1974_s_at	974_at	1271_g_at	1045_s_at	36645_at	1154_at	1461_at	1378_g_at	39784_at
S1P_Signaling	BioCarta	36926_at	876_at	364_s_at	36938_at	461_at	1000_at	210_at	983_at	2023_g_at	35980_at	34086_at	40972_at	41715_at	1564_at	587_at	984_g_at	160039_at	37307_at	976_s_at	33809_at	40273_at	35617_at	2022_at
SA_B_CELL_RECEPTOR_COMPLEXES	SigmaAldrich	33855_at	32549_at	1565_s_at	38118_at	34481_at	1590_s_at	865_at	1000_at	548_s_at	32583_at	36885_at	1127_at	1915_s_at	33260_at	1781_at	1333_f_at	33009_at	2004_at	537_f_at	32616_at	517_at	2050_s_at	35701_at	1130_at	1402_at	2094_s_at	37970_at	2024_s_at	1844_s_at	1704_at	37575_at	976_s_at	33275_at	1994_at	1916_s_at	1919_at	38242_at	33229_at	40864_at	34679_at	38902_r_at
SA_BONE_MORPHOGENETIC	SigmaAldrich	36953_at	39406_at	1325_at	1955_s_at	510_g_at	40231_at	37280_at	39407_at	39998_at	35021_at	509_at	39565_at
SA_CASPASE_CASCADE	SigmaAldrich	37643_at	37227_at	41146_at	36578_at	1717_s_at	AFFX-MurFAS_at	37644_s_at	33775_s_at	1766_g_at	31491_s_at	1441_s_at	32047_at	486_at	38713_at	39999_at	1808_s_at	33774_at	487_g_at	1287_at	1851_s_at	32135_at	37137_at	1440_s_at	37656_at	1765_at	38281_at	1326_at	36143_at	389_s_at	34937_at	1858_at	32904_at
SA_DAG1	SigmaAldrich	33567_at	32323_at	33669_at	35980_at	34431_at	38921_at	118_at	210_at	1681_at	36311_at	878_s_at	1442_at
SA_FAS_SIGNALLING	SigmaAldrich	37643_at	1808_s_at	2060_at	33774_at	AFFX-MurFAS_at	37644_s_at	33775_s_at	33659_at	1851_s_at	1440_s_at	31491_s_at	32746_at	1867_at	1441_s_at	1910_s_at	1847_s_at	36143_at	389_s_at	1909_at	1858_at	1868_g_at	37093_at	2038_g_at	36044_at
SA_G1_AND_S_PHASES	SigmaAldrich	33848_r_at	1880_at	33987_at	1859_s_at	1974_s_at	33659_at	2068_s_at	32885_f_at	39336_at	2008_s_at	2031_s_at	2017_s_at	1322_at	36774_f_at	1713_s_at	1792_g_at	1833_at	2028_s_at	2034_s_at	33847_s_at	1942_s_at	38418_at	2020_at	38509_at
SA_G2_AND_M_PHASES	SigmaAldrich	1738_at	33317_at	36047_at	1347_at	33324_s_at	36909_at	35407_at	38920_at	40915_r_at	1803_at	2033_s_at	2031_s_at	1969_s_at
SA_MMP_CYTOKINE_CONNECTION	SigmaAldrich	37200_at	37013_at	1520_s_at	882_at	31616_r_at	160032_at	33012_at	41445_at	40493_at	1852_at	36798_g_at	31615_i_at	33813_at	31499_s_at	39402_at	1262_s_at	31472_s_at	1830_s_at	1126_s_at	1563_s_at	36797_at	2036_s_at	245_at	34929_at	1583_at	36796_at	259_s_at	971_s_at
SA_PROGRAMMED_CELL_DEATH	SigmaAldrich	37227_at	2060_at	38871_at	1861_at	2066_at	1998_i_at	487_g_at	1687_s_at	1997_s_at	32725_at	37203_at	1910_s_at	32726_g_at	1847_s_at	486_at	846_s_at	2067_f_at	1909_at	34742_at	2065_s_at	33047_at	31611_s_at	2038_g_at	1615_at
SA_PTEN_PATHWAY	SigmaAldrich	1564_at	2009_at	33855_at	38118_at	1565_s_at	32121_at	381_s_at	39553_at	1000_at	33628_g_at	1434_at	33804_at	33627_at	2023_g_at	976_s_at	35365_at	1986_at	33333_at	36386_at	33260_at	32597_at	40972_at	2022_at	39552_at	40704_at
SA_REG_CASCADE_OF_CYCLIN_EXPR	SigmaAldrich	33848_r_at	1724_at	2068_s_at	32885_f_at	38706_at	1914_at	2017_s_at	1322_at	36774_f_at	1713_s_at	1792_g_at	1833_at	1943_at	2028_s_at	41060_at	2034_s_at	35249_at	1703_g_at	38707_r_at	33847_s_at	2021_s_at	1942_s_at	38418_at	2020_at	40697_at
SA_TRKA_RECEPTOR	SigmaAldrich	1564_at	33855_at	32519_at	38118_at	1565_s_at	32121_at	35701_at	1590_s_at	381_s_at	790_at	1130_at	1131_at	791_g_at	1844_s_at	33628_g_at	33627_at	2031_s_at	2023_g_at	33275_at	1673_at	33260_at	1781_at	1394_at	40972_at	2022_at	36805_s_at	40704_at	37309_at
salmonellaPathway	BioCarta	2050_s_at	35734_at	39736_at	35810_at	31737_at	37190_at	38815_at	34691_f_at	321_at	39043_at	38758_at	1718_at	39875_at	38445_at	35733_at	34692_r_at	40154_at	35271_at	40864_at	40192_at
sarsPathway	BioCarta	32486_at	41485_at	33819_at	1671_s_at	41092_at	32590_at	33820_g_at	39173_at	37752_at	39385_at	34430_at	37733_at
setPathway	BioCarta	40189_at	37034_at	40757_at	2025_s_at	39073_at	37137_at	32047_at	1521_at	34937_at	38065_at	1985_s_at	32904_at	33831_at
shhPathway	BioCarta	1200_at	37221_at	38214_at	37834_at	116_at	36947_s_at	32960_at	1253_at	1512_at	1091_at	227_g_at	827_s_at	40645_at	36359_at	31724_at	36946_at	38905_at	41768_at	34456_s_at	836_at	33474_at	40358_at	226_at	36215_at
SIG_BCR_Signaling_Pathway	SignallingAlliance	39780_at	2060_at	1565_s_at	32121_at	36538_at	381_s_at	548_s_at	1253_at	37180_at	39144_at	40520_g_at	40636_at	40519_at	2023_g_at	138_at	643_at	35373_at	40635_at	40972_at	517_at	39143_at	1564_at	35282_r_at	38277_at	33628_g_at	33627_at	32540_at	976_s_at	172_at	1919_at	32857_at	38242_at	1768_s_at	1269_at	2022_at	34679_at	2038_g_at	38742_s_at	36874_at	33855_at	632_at	38118_at	34481_at	1861_at	1000_at	182_at	38521_at	40518_at
SIG_CD40PATHWAYMAP	SignallingAlliance	36267_at	1377_at	41065_at	1209_at	32121_at	41506_at	2070_i_at	381_s_at	1000_at	40075_at	1378_g_at	983_at	41507_at	1328_at	41280_r_at	41279_f_at	35373_at	38276_at	34812_at	535_s_at	1461_at	40704_at	41444_at	544_at	1845_at	36004_at	1238_at	37588_s_at	35150_at	1671_s_at	984_g_at	1010_at	40363_r_at	38431_at	37970_at	1005_at	545_g_at	33628_g_at	33627_at	37057_s_at	37733_at	976_s_at	36910_at	33784_at	1709_g_at	1712_s_at	38438_at	35149_at
SIG_CHEMOTAXIS	SignallingAlliance	31451_at	32121_at	35661_g_at	36538_at	381_s_at	2023_g_at	35373_at	1558_g_at	40972_at	39213_at	35660_at	40192_at	1559_at	1564_at	34152_at	39281_at	777_at	36152_at	39524_at	37190_at	39649_at	33628_g_at	33627_at	36287_at	41014_s_at	39875_at	33814_at	34735_at	31760_at	552_at	37573_at	33075_at	1269_at	34329_at	2022_at	553_g_at	35734_at	39700_at	39553_at	182_at	33659_at	321_at	32778_at	35271_at	32876_s_at	36598_s_at	1560_g_at	33073_at
SIG_IL4RECEPTOR_IN_B_LYPHOCYTES	SignallingAlliance	38742_s_at	2005_s_at	33855_at	632_at	2060_at	1565_s_at	38118_at	32121_at	36538_at	1861_at	381_s_at	1000_at	1253_at	41049_at	1547_at	2007_g_at	2023_g_at	872_i_at	138_at	1457_at	1847_s_at	33260_at	35373_at	845_at	40972_at	2006_at	40704_at	1917_at	1564_at	850_r_at	38743_f_at	33628_g_at	41222_at	33627_at	40645_at	976_s_at	41594_at	404_at	41593_at	1910_s_at	36386_at	32857_at	41592_at	1909_at	1269_at	2022_at	851_s_at	2038_g_at
SIG_InsulinReceptorPathwayInCardiacMyocytes	SignallingAlliance	1565_s_at	32121_at	34919_at	381_s_at	865_at	1424_s_at	1253_at	41049_at	32530_at	33323_r_at	40636_at	2023_g_at	2037_s_at	935_at	872_i_at	39093_s_at	409_at	34642_at	35373_at	31982_at	40635_at	40972_at	40192_at	37946_at	1564_at	1232_s_at	33628_g_at	33627_at	1713_s_at	976_s_at	40570_at	238_at	37076_at	32857_at	33229_at	32324_at	1269_at	2022_at	33604_at	38742_s_at	33855_at	632_at	38118_at	32892_at	591_s_at	39553_at	1000_at	34597_at
SIG_PIP3_signaling_in_B_lymphocytes	SignallingAlliance	34919_at	35661_g_at	36538_at	865_at	548_s_at	37180_at	40520_g_at	40636_at	40519_at	2023_g_at	2037_s_at	643_at	1249_at	40635_at	32979_at	37056_at	40972_at	35660_at	517_at	37946_at	1564_at	34152_at	41014_s_at	1713_s_at	1919_at	238_at	31760_at	33229_at	2022_at	34679_at	32892_at	34481_at	39553_at	182_at	33997_at	40518_at	32778_at	36885_at	32181_at	1127_at	1333_f_at	537_f_at	40704_at	32616_at	31759_at	34740_at	32779_s_at	1402_at
SIG_PIP3SIGINCARDIACMYOCTES	SignallingAlliance	33848_r_at	36597_at	1565_s_at	32121_at	34919_at	381_s_at	36538_at	267_at	865_at	1424_s_at	670_s_at	1253_at	32530_at	41049_at	33323_r_at	2023_g_at	2037_s_at	1833_at	872_i_at	32599_at	2034_s_at	409_at	34642_at	32536_at	1249_at	37724_at	1558_g_at	32979_at	34742_at	40972_at	39213_at	40192_at	1559_at	37946_at	1564_at	1827_s_at	1232_s_at	33628_g_at	33627_at	1713_s_at	40139_at	1792_g_at	35684_at	33814_at	425_at	238_at	37076_at	40849_s_at
at	33847_s_at	1911_s_at	39552_at	38737_at	851_s_at	588_at
SIG_Regulation_of_the_actin_cytoskeleton_by_Rho_GTPases	SignallingAlliance	35734_at	33659_at	39101_at	321_at	38840_s_at	34488_i_at	35271_at	32876_s_at	1558_g_at	36675_r_at	1560_g_at	33073_at	39213_at	34489_f_at	40192_at	39105_at	1559_at	1564_at	39736_at	32875_at	32749_s_at	777_at	34643_at	36152_at	39524_at	37190_at	32847_at	38839_at	35335_at	1015_s_at	39070_at	33814_at	39875_at	1197_at	34735_at	1245_i_at	34160_at	35733_at	34490_f_at	1557_at	33074_g_at	37573_at	33075_at	35330_at	35307_at	34329_at	32750_r_at
skp2e2fPathway	BioCarta	37757_at	41759_at	1570_f_at	2044_s_at	1273_r_at	39723_at	2010_at	1670_at	1914_at	1322_at	1792_g_at	1833_at	39724_s_at	1274_s_at	2028_s_at	1941_at	41060_at	39449_at	2021_s_at	1571_f_at	1672_f_at	1900_at
soddPathway	BioCarta	33166_at	1563_s_at	33784_at	33774_at	40696_at	1717_s_at	33775_s_at	38755_at	1852_at	475_at	1583_at	31491_s_at	1729_at	259_s_at	33813_at
sppaPathway	BioCarta	38742_s_at	35571_at	1590_s_at	33341_at	37969_at	1000_at	548_s_at	36117_at	1336_s_at	120_at	36885_at	35980_at	41700_at	37202_at	36772_at	32808_at	35938_at	1917_at	35701_at	1130_at	38743_f_at	1844_s_at	160029_at	38904_at	976_s_at	2055_s_at	33809_at	33777_at	1217_g_at	1437_at	37301_at	32304_at	40566_at	1938_at	37484_at
spryPathway	BioCarta	36935_at	38742_s_at	33855_at	1675_at	38118_at	1565_s_at	35701_at	1590_s_at	407_at	1130_at	1000_at	38743_f_at	1844_s_at	37777_at	34416_at	38904_at	976_s_at	33700_at	37327_at	1537_at	33260_at	33066_at	38767_at	1542_at	1938_at	1917_at
srcRPTPPathway	BioCarta	33855_at	1565_s_at	1803_at	1336_s_at	160029_at	38904_at	1738_at	1347_at	1496_at	1217_g_at	1437_at	33324_s_at	35407_at	1584_at	40915_r_at	1768_s_at	37301_at	1945_at	32304_at	40566_at	1938_at	34736_at
ST_ADRENERGIC	Signalling Transduction
KE	32121_at	381_s_at	1491_at	38580_at	37272_at	35373_at	34614_at	564_at	1564_at	118_at	33628_g_at	33627_at	41014_s_at	1577_at	38904_at	37733_at	976_s_at	37454_at	36182_at	37327_at	1537_at	33790_at	35433_s_at	1578_g_at	1708_at	38581_at	35822_at	1269_at	38742_s_at	40365_at	33527_at	34434_at	36938_at	461_at	33789_at	182_at	41476_at	36710_at	32778_at	1912_s_at	40704_at	1917_at	34552_at	1671_s_at	32779_s_at	38743_f_at	36989_at	40306_at	32356_at
ST_B_Cell_Antigen_Receptor	Signalling Transduction
KE	36267_at	1377_at	32519_at	1565_s_at	32121_at	36538_at	381_s_at	31365_f_at	548_s_at	37180_at	41469_at	1378_g_at	902_at	2023_g_at	37272_at	32106_at	35373_at	40972_at	1461_at	41678_at	517_at	1564_at	1130_at	1131_at	1844_s_at	118_at	545_g_at	33628_g_at	33627_at	976_s_at	1919_at	31364_i_at	32857_at	38242_at	1768_s_at	1269_at	2022_at	34679_at	38742_s_at	33855_at	41065_at	38118_at	34481_at	1861_at	36885_at	40713_at	33260_at	38276_at	1333_f_at
ST_Dictyostelium_discoideum_cAMP_Chemotaxis_Pathway	Signalling Transduction
KE	40509_at	35734_at	32121_at	36600_at	34650_at	381_s_at	1000_at	182_at	39222_at	41469_at	32778_at	37272_at	35271_at	35948_at	35373_at	1558_g_at	40704_at	39105_at	1564_at	37556_at	32779_s_at	34643_at	1130_at	1508_at	118_at	1844_s_at	36989_at	33628_g_at	33627_at	35872_at	976_s_at	37223_at	755_at	33839_at	35733_at	1557_at	32716_at	37573_at	37343_at	35822_at	1269_at	756_at	105_at
ST_Differentiation_Pathway_in_PC12_Cells	Signalling Transduction
KE	32300_s_at	32121_at	2070_i_at	381_s_at	41508_at	865_at	37863_at	670_s_at	36240_at	32583_at	1870_at	40149_at	38580_at	36297_at	41280_r_at	41279_f_at	1781_at	35373_at	38982_at	36805_s_at	415_at	1564_at	37588_s_at	38431_at	33628_g_at	33524_at	33627_at	35301_at	38904_at	976_s_at	1712_s_at	41373_s_at	40849_s_at	34006_s_at	33229_at	1708_at	38581_at	1269_at	40567_at	33831_at	38118_at	36938_at	461_at	1000_at	39222_at	36710_at	877_at	1871_g_at	37535_at
ST_ERK1_ERK2_MAPK_Pathway	Signalling Transduction
KE	1377_at	33855_at	32519_at	1565_s_at	38118_at	32892_at	35299_at	1861_at	865_at	1443_at	1000_at	670_s_at	877_at	1378_g_at	37752_at	40186_at	1127_at	36297_at	41193_at	33260_at	37535_at	1848_at	1130_at	1131_at	34770_at	33325_at	1844_s_at	1788_s_at	40306_at	38756_at	37057_s_at	976_s_at	1707_g_at	40849_s_at	38438_at	37026_at	32857_at	33229_at	1891_at	1654_at	465_at	1706_at
ST_Fas_Signaling_Pathway	Signalling Transduction
KE	36267_at	41146_at	1377_at	35381_at	2070_i_at	AFFX-MurFAS_at	2066_at	31365_f_at	32031_at	749_at	1378_g_at	902_at	31491_s_at	40494_at	38840_s_at	771_s_at	41161_at	1754_at	41535_at	40579_at	41280_r_at	643_at	41279_f_at	36628_at	1461_at	39999_at	2004_at	41678_at	1808_s_at	33774_at	40696_at	37588_s_at	1998_i_at	38431_at	545_g_at	1687_s_at	1997_s_at	976_s_at	35684_at	37327_at	39867_at	32574_at	34735_at	1537_at	31364_i_at	33784_at	1712_s_at	35372_r_at	36143_at
362_at	38213_at
ST_G_alpha_5_Pathway	Signalling Transduction
KE	38742_s_at	34552_at	36938_at	461_at	670_s_at	38743_f_at	36710_at	40306_at	877_at	36240_at	38904_at	976_s_at	37973_at	40849_s_at	40705_at	38982_at	1654_at	35822_at	37535_at	1938_at	1917_at
ST_G_alpha_i_Pathway_	Signalling Transduction
KE	1565_s_at	364_s_at	210_at	41469_at	902_at	2023_g_at	37272_at	35980_at	38982_at	40972_at	34614_at	1251_g_at	41678_at	1564_at	35654_at	118_at	41086_at	41014_s_at	38904_at	976_s_at	37327_at	1537_at	32857_at	35822_at	2022_at	39708_at	31699_at	38742_s_at	33527_at	33855_at	38118_at	36938_at	33080_s_at	461_at	182_at	289_at	32778_at	33260_at	2088_s_at	1917_at	32779_s_at	38743_f_at	36989_at	40306_at	32356_at	755_at	33839_at	1270_at	901_g_at
ST_Ga12_Pathway	Signalling Transduction
KE	38742_s_at	35571_at	2070_i_at	34481_at	38247_at	36117_at	902_at	1699_at	32583_at	37202_at	1698_g_at	36151_at	33539_at	37056_at	33538_at	2088_s_at	1917_at	41678_at	41230_at	34701_at	38743_f_at	1722_at	36344_at	38904_at	976_s_at	31972_at	1919_at	35617_at	177_at	34006_s_at	41394_at	36345_g_at	35822_at	2071_s_at	1938_at	38213_at
ST_Ga13_Pathway	Signalling Transduction
KE	36267_at	31699_at	1377_at	2060_at	41065_at	2070_i_at	36117_at	1409_at	41469_at	1378_g_at	2023_g_at	1847_s_at	32106_at	36151_at	38276_at	33009_at	535_s_at	40972_at	1461_at	2004_at	123_at	40192_at	544_at	1564_at	1845_at	36004_at	39736_at	34886_at	33635_at	34701_at	39281_at	40363_r_at	1327_s_at	545_g_at	40109_at	35335_at	36910_at	34735_at	1712_s_at	38438_at	1139_at	1910_s_at	36386_at	177_at	34006_s_at	41394_at	36480_at	31721_at	1909_at
ST_Gaq_Pathway	Signalling Transduction
KE	36267_at	31699_at	1377_at	41065_at	182_at	1378_g_at	32778_at	2023_g_at	38580_at	37272_at	36151_at	38276_at	535_s_at	40972_at	1461_at	544_at	1564_at	36004_at	40363_r_at	32779_s_at	118_at	36989_at	545_g_at	41014_s_at	755_at	33839_at	38438_at	36386_at	177_at	41394_at	36480_at	37343_at	35822_at	38581_at	38447_at	756_at	2022_at	40362_at
ST_GRANULE_CELL_SURVIVAL_PATHWAY	Signalling Transduction
KE	41146_at	1032_at	2070_i_at	664_at	1033_g_at	36938_at	461_at	670_s_at	36710_at	877_at	902_at	32583_at	1912_s_at	38580_at	37272_at	41280_r_at	1915_s_at	41279_f_at	37187_at	2088_s_at	37535_at	41678_at	41444_at	1845_at	1238_at	37588_s_at	38431_at	2094_s_at	37970_at	118_at	1287_at	36989_at	976_s_at	36182_at	1916_s_at	36910_at	1709_g_at	1712_s_at	40849_s_at	36143_at	35433_s_at	34006_s_at	1708_at	38581_at	2071_s_at
ST_Integrin_Signaling_Pathway	Signalling Transduction
KE	1565_s_at	41266_at	37180_at	902_at	41279_f_at	38501_s_at	1558_g_at	772_at	40972_at	40192_at	1559_at	38219_at	41481_at	37588_s_at	1508_at	38904_at	976_s_at	34735_at	1712_s_at	38804_at	34724_at	38742_s_at	1635_at	33855_at	38118_at	33082_at	39730_at	36117_at	37543_at	37846_at	40828_at	691_g_at	34351_at	38964_r_at	32876_s_at	2088_s_at	33073_at	2061_at	40704_at	1398_g_at	39736_at	1238_at	885_g_at	37970_at	40306_at	32847_at	1085_s_at	36910_at	1397_at
666_at	120_at	35731_at	1636_g_at	35271_at	33260_at	40676_at	1134_at	32166_at	39329_at	1560_g_at	1917_at	41444_at	39105_at	1845_at	32875_at	2041_i_at	38743_f_at	1434_at	35335_at	2040_s_at	40480_s_at	1709_g_at	1245_i_at	33411_g_at	39765_at	1557_at	33074_g_at	2071_s_at	39552_at	39753_at
ST_Interferon_gamma_Pathway	Signalling Transduction
KE	41594_at	32859_at	37468_at	33750_at	33339_g_at	32860_g_at	37017_at	33338_at	1457_at	40702_at	1021_at	1611_s_at	1038_s_at	38646_s_at	614_at
ST_Interleukin_4_Pathway	Signalling Transduction
KE	2005_s_at	33855_at	38118_at	1565_s_at	36538_at	1547_at	41469_at	AFFX-MurIL4_at	2007_g_at	33981_at	2023_g_at	2037_s_at	1457_at	643_at	32106_at	33260_at	845_at	2006_at	40972_at	40704_at	359_at	37946_at	1564_at	37468_at	40827_at	41222_at	1506_at	38904_at	172_at	41594_at	404_at	1574_s_at	238_at	35797_at	37505_at	32857_at	993_at	2022_at	1938_at
ST_Jak_STAT_Pathway	Signalling Transduction
KE	41594_at	37468_at	33750_at	2005_s_at	1457_at	36573_at	2006_at	1547_at	2007_g_at	32558_at	38646_s_at
ST_JNK_MAPK_Pathway	Signalling Transduction
KE	250_at	32549_at	2070_i_at	1699_at	32583_at	1249_at	33539_at	32979_at	40997_at	33538_at	37807_at	2004_at	40822_at	40192_at	1564_at	41230_at	36163_at	38431_at	36278_at	36905_at	1788_s_at	1330_at	1722_at	38555_at	37575_at	1712_s_at	34006_s_at	1708_at	38980_at	38902_r_at	1562_g_at	1209_at	38118_at	40823_s_at	1561_at	33997_at	1368_at	1698_g_at	33009_at	35652_g_at	41444_at	35651_at	1398_g_at	1845_at	39736_at	1238_at	34521_at	1974_s_at	1327_s_at
ST_MONOCYTE_AD_PATHWAY	Signalling Transduction
KE	33527_at	36938_at	1491_at	461_at	182_at	36710_at	902_at	32778_at	41072_at	1912_s_at	38580_at	32876_s_at	2088_s_at	34614_at	41678_at	1564_at	2050_s_at	34552_at	32875_at	34701_at	32779_s_at	39524_at	36989_at	37990_at	41014_s_at	976_s_at	32356_at	36182_at	33809_at	755_at	33839_at	35433_s_at	37343_at	35822_at	465_at	38581_at	40864_at	31550_at	756_at
ST_p38_MAPK_Pathway	Signalling Transduction
KE	1377_at	670_s_at	1409_at	1378_g_at	36297_at	1781_at	33539_at	33538_at	40192_at	1564_at	984_g_at	1005_at	36278_at	36905_at	38555_at	37733_at	976_s_at	1712_s_at	40849_s_at	38980_at	40033_at	1209_at	41506_at	35299_at	36180_s_at	1622_at	2014_s_at	877_at	1368_at	983_at	37752_at	1439_s_at	41507_at	2075_s_at	37535_at	35652_g_at	35651_at	1543_at	1845_at	39736_at	1671_s_at	1010_at	1327_s_at	35634_at	40109_at	33275_at	36910_at	36785_at	36714_at
ST_Phosphoinositide_3_Kinase_Pathway	Signalling Transduction
KE	33855_at	632_at	38118_at	1565_s_at	32892_at	34919_at	36538_at	1861_at	39553_at	865_at	1424_s_at	1253_at	32530_at	33323_r_at	2023_g_at	2037_s_at	1127_at	409_at	34642_at	33260_at	33322_i_at	37056_at	40972_at	40704_at	37946_at	1564_at	39695_at	1232_s_at	33325_at	40827_at	1011_s_at	1434_at	40645_at	1713_s_at	172_at	40570_at	238_at	1235_at	36386_at	32857_at	33229_at	32324_at	2022_at	39552_at	38213_at
ST_STAT3_Pathway	Signalling Transduction
KE	37468_at	2005_s_at	160032_at	289_at	1547_at	38299_at	2007_g_at	38904_at	41594_at	33750_at	1457_at	2006_at	1938_at	39708_at	32558_at	38646_s_at
ST_T_Cell_Signal_Transduction	Signalling Transduction
KE	36267_at	38361_g_at	1377_at	1565_s_at	31365_f_at	1378_g_at	40520_g_at	902_at	40519_at	37272_at	39319_at	1558_g_at	38360_at	1461_at	39213_at	41678_at	2059_s_at	1559_at	1498_at	118_at	545_g_at	33291_at	976_s_at	33814_at	1919_at	31364_i_at	32857_at	33075_at	1768_s_at	34329_at	989_at	38359_at	38742_s_at	32861_s_at	33855_at	41065_at	34481_at	1082_at	33238_at	40518_at	1136_at	1479_g_at	40713_at	1478_at	41795_at	34351_at	33260_at	38276_at	535_s_at
ST_Tumor_Necrosis_Factor_Pathway	Signalling Transduction
KE	36267_at	36578_at	1377_at	41065_at	1717_s_at	33775_s_at	38755_at	1378_g_at	31491_s_at	32583_at	32746_at	1867_at	33166_at	1563_s_at	40579_at	595_at	38276_at	535_s_at	36628_at	1461_at	1583_at	1868_g_at	1729_at	544_at	1845_at	36004_at	33774_at	40696_at	40363_r_at	36905_at	1852_at	545_g_at	1330_at	33813_at	36910_at	33784_at	36714_at	1712_s_at	38438_at	36143_at	475_at	259_s_at	40362_at
ST_Type_I_Interferon_Pathway	Signalling Transduction
KE	41594_at	32859_at	1214_s_at	33750_at	33339_g_at	32860_g_at	33338_at	1457_at	993_at	1244_at	36770_at	1157_s_at	38517_at	38646_s_at
ST_Wnt_beta_catenin_Pathway	Signalling Transduction
KE	632_at	35658_at	35977_at	40130_at	1253_at	642_s_at	1912_s_at	2023_g_at	40421_at	1496_at	38775_at	38064_at	40972_at	1564_at	33406_at	33594_at	641_at	256_s_at	35178_at	32521_at	163_at	40184_at	33319_at	40645_at	40777_at	36182_at	35433_s_at	2022_at	35624_at
ST_Wnt_Ca2_cyclic_GMP_Pathway	Signalling Transduction
KE	31813_at	31365_f_at	35032_at	182_at	32778_at	39576_at	34038_at	37272_at	40713_at	41794_at	32105_f_at	36044_at	40897_at	32104_i_at	32538_at	39388_at	32779_s_at	650_s_at	32204_at	118_at	36989_at	31364_i_at	755_at	33839_at	37343_at	35822_at	756_at	34846_at	34847_s_at
stat3Pathway	BioCarta	976_s_at	41594_at	37468_at	2005_s_at	1457_at	267_at	1000_at	993_at	289_at	2006_at	1547_at	2007_g_at	39708_at	40139_at
stemPathway	BioCarta	856_at	34021_at	882_at	1538_s_at	436_at	35464_at	40699_at	AFFX-MurIL4_at	33966_at	38299_at	33981_at	1401_g_at	35517_at	1023_at	41630_at	1574_s_at	1159_at	35372_r_at	1334_s_at	1400_at	34037_at	1263_at
stressPathway	BioCarta	1377_at	2070_i_at	1622_at	39742_at	2014_s_at	36645_at	1378_g_at	32583_at	822_s_at	258_at	1239_s_at	33166_at	187_at	1563_s_at	36297_at	2075_s_at	33009_at	1240_at	1045_s_at	1461_at	2004_at	1729_at	1543_at	1845_at	36296_at	36004_at	34449_at	1295_at	40696_at	1671_s_at	1211_s_at	974_at	1852_at	37733_at	36910_at	33784_at	33770_at	1712_s_at	38438_at	34448_s_at	34006_s_at	1271_g_at	2071_s_at	475_at	259_s_at	35960_at
tall1Pathway	BioCarta	1377_at	1209_at	1295_at	35287_at	2070_i_at	41353_at	1671_s_at	974_at	36645_at	1378_g_at	37057_s_at	37733_at	31410_at	33784_at	1328_at	33770_at	38438_at	34006_s_at	35238_at	1271_g_at	1045_s_at	2071_s_at
tcapoptosisPathway	BioCarta	37643_at	856_at	1808_s_at	32861_s_at	37644_s_at	AFFX-MurFAS_at	38319_at	1851_s_at	39226_at	1440_s_at	35517_at	1441_s_at	31710_at	37078_at	389_s_at	1858_at	36277_at	432_s_at
tcraPathway	BioCarta	856_at	1498_at	33238_at	38319_at	40518_at	39226_at	40520_g_at	40519_at	40479_at	35517_at	31710_at	40480_s_at	37039_at	2039_s_at	37078_at	36277_at	432_s_at	2059_s_at	40481_r_at
tcrPathway	BioCarta	250_at	1377_at	39780_at	1565_s_at	2070_i_at	249_at	1760_s_at	39144_at	1158_s_at	1378_g_at	1336_s_at	32583_at	40479_at	2039_s_at	41143_at	1781_at	35373_at	1045_s_at	1461_at	2004_at	41287_s_at	2059_s_at	40822_at	40481_r_at	39143_at	36935_at	35701_at	1295_at	38277_at	1498_at	1130_at	1844_s_at	37370_i_at	32540_at	160029_at	1919_at	41288_at	1712_s_at	34006_s_at	1269_at	32304_at	38742_s_at	33855_at	38118_at	34481_at	1590_s_at	1082_at	41144_g_at
tcytotoxicPathway	BioCarta	38547_at	32861_s_at	38319_at	32640_at	40518_at	39226_at	40520_g_at	40699_at	40519_at	37918_at	31710_at	39395_at	37078_at	40738_at	36277_at	432_s_at
telPathway	BioCarta	34718_at	2060_at	1570_f_at	2044_s_at	31476_g_at	32316_s_at	39430_at	1869_at	237_s_at	1701_at	32766_at	32256_r_at	1335_at	32274_r_at	32258_r_at	1847_s_at	37724_at	585_at	31474_r_at	32255_i_at	1571_f_at	1329_s_at	32257_f_at	1564_at	40791_at	1973_s_at	1827_s_at	1342_g_at	1974_s_at	31335_at	37327_at	33181_at	1537_at	1910_s_at	1437_at	31473_s_at	1909_at	38733_at	1672_f_at	584_s_at	32304_at	40566_at	31475_at	1900_at	2038_g_at	1361_at	2093_s_at
tercPathway	BioCarta	37561_at	1570_f_at	2044_s_at	37928_at	1571_f_at	1672_f_at	40466_at	1156_at	1900_at	41573_at
tertPathway	BioCarta	422_s_at	1500_at	1981_s_at	1973_s_at	1827_s_at	1974_s_at	1684_s_at	41573_at	40569_at	476_s_at	37724_at	38771_at	39948_at	1156_at
TGF_Beta_Signaling_Pathway	BioCarta	32859_at	1377_at	2092_s_at	1433_g_at	40702_at	1378_g_at	32583_at	1114_at	32562_at	38889_at	36021_at	38944_at	1453_at	34669_at	34950_at	31912_at	38431_at	1857_at	1611_s_at	115_at	1815_g_at	40777_at	41500_at	1897_at	32860_g_at	510_g_at	867_s_at	33338_at	1542_at	33831_at	34342_s_at	259_s_at	39708_at	36953_at	1952_s_at	34501_at	41499_at	1000_at	41445_at	289_at	1013_at	40333_at	1918_at	40357_at	1865_at	1814_at	1830_s_at	39935_at
tgfbPathway	BioCarta	36953_at	33896_at	1000_at	41445_at	2082_s_at	1433_g_at	1912_s_at	1865_at	1814_at	1262_s_at	38889_at	1830_s_at	39935_at	1866_g_at	38944_at	1453_at	32903_at	551_at	1454_at	1130_at	1957_s_at	1844_s_at	36905_at	1857_at	1815_g_at	35634_at	1735_g_at	1767_s_at	509_at	36182_at	510_g_at	35433_s_at	33831_at	977_s_at	971_s_at
th1th2Pathway	BioCarta	32861_s_at	34021_at	35150_at	1538_s_at	33945_at	1066_at	40702_at	1021_at	AFFX-MurIL4_at	41140_at	1611_s_at	1038_s_at	33981_at	1702_at	404_at	1574_s_at	37039_at	36270_at	563_at	35149_at	36377_at	1534_at	1165_at	33955_at
thelperPathway	BioCarta	38547_at	856_at	32861_s_at	38319_at	32640_at	40518_at	39226_at	40520_g_at	40519_at	35517_at	37918_at	31710_at	39395_at	37078_at	40738_at	36277_at	432_s_at
tidPathway	BioCarta	32965_f_at	37468_at	1377_at	1500_at	1570_f_at	1295_at	2044_s_at	1974_s_at	1852_at	36645_at	40702_at	1021_at	1378_g_at	36541_at	41140_at	1611_s_at	1038_s_at	33813_at	37847_at	1684_s_at	35486_at	1563_s_at	38438_at	1571_f_at	1271_g_at	39416_at	1045_s_at	1672_f_at	1461_at	1583_at	259_s_at	1900_at	35960_at
tnf_and_fas_network	BioCarta	37643_at	36578_at	1209_at	37644_s_at	AFFX-MurFAS_at	39742_at	1715_at	35905_s_at	39482_at	32318_s_at	AFFX-HUMGAPDH/M33197_M_at	38953_at	AFFX-HUMGAPDH/M33197_5_at	1441_s_at	40533_at	1563_s_at	41161_at	1328_at	1754_at	848_at	AFFX-HSAC07/X00351_5_st	37277_at	AFFX-HSAC07/X00351_3_st	595_at	1583_at	AFFX-HSAC07/X00351_M_st	AFFX-HUMGAPDH/M33197_5_st	AFFX-HUMGAPDH/M33197_M_st	1808_s_at	AFFX-HSAC07/X00351_M_at	1851_s_at	1852_at	AFFX-HSAC07/X00351_5_at	1440_s_at	37057_s_at	33813_at	AFFX-HUMGAPDH/M33197_3_at	33784_at	AFFX-HUMGAPDH/M33197_3_st	849_g_at	40532_at	389_s_at	35238_at	1858_at	259_s_at	AFFX-HSAC07/X00351_3_at
tnfr1Pathway	BioCarta	41146_at	37378_r_at	1570_f_at	2070_i_at	33775_s_at	2044_s_at	38755_at	37377_i_at	31491_s_at	32583_at	822_s_at	1239_s_at	33166_at	32047_at	1563_s_at	1571_f_at	1558_g_at	33009_at	1240_at	1560_g_at	2004_at	1729_at	1559_at	1845_at	2012_s_at	40129_at	34449_at	33774_at	40696_at	1211_s_at	1984_s_at	1287_at	36905_at	1852_at	1250_at	37985_at	36910_at	36987_at	33784_at	1712_s_at	1245_i_at	34448_s_at	1557_at	36143_at	34006_s_at	38398_at	34937_at	1672_f_at
tnfr2Pathway	BioCarta	34344_at	1377_at	36296_at	36004_at	1295_at	40696_at	39742_at	1005_at	974_at	36645_at	1378_g_at	37057_s_at	33813_at	258_at	33784_at	33770_at	38438_at	848_at	849_g_at	595_at	1271_g_at	33009_at	1045_s_at	1461_at	475_at	1583_at	2004_at	35960_at
tob1Pathway	BioCarta	36953_at	32861_s_at	34021_at	1538_s_at	41445_at	1433_g_at	40702_at	39226_at	AFFX-MurIL4_at	33981_at	1702_at	1814_at	1262_s_at	1830_s_at	37078_at	38944_at	32903_at	40631_at	39286_at	432_s_at	1454_at	1957_s_at	38319_at	1021_at	1611_s_at	1815_g_at	1735_g_at	1767_s_at	509_at	1897_at	1574_s_at	31710_at	510_g_at	36277_at	971_s_at
tollPathway	BioCarta	1377_at	1209_at	38369_at	2070_i_at	1622_at	2014_s_at	36645_at	1378_g_at	32583_at	2075_s_at	1915_s_at	1781_at	33009_at	1045_s_at	1461_at	1100_at	2004_at	1543_at	1845_at	36661_s_at	36004_at	1295_at	1671_s_at	33956_at	33488_at	2094_s_at	929_at	36905_at	974_at	35634_at	37733_at	34145_at	33275_at	1916_s_at	36910_at	40310_at	33770_at	1712_s_at	38438_at	34006_s_at	34144_at	1271_g_at	2071_s_at	38980_at	35960_at	31381_at
tpoPathway	BioCarta	32859_at	38742_s_at	33855_at	1565_s_at	38118_at	1590_s_at	1082_at	33869_at	1000_at	289_at	40458_at	1336_s_at	32583_at	594_s_at	40258_at	34351_at	1915_s_at	472_at	33260_at	35373_at	506_s_at	1098_at	37480_at	40704_at	1917_at	36935_at	37468_at	33339_g_at	1675_at	35701_at	34004_at	1130_at	2094_s_at	38743_f_at	1844_s_at	160029_at	1916_s_at	32860_g_at	33338_at	1217_g_at	1437_at	473_g_at	37301_at	1269_at	32304_at	36235_at	40566_at	39708_at
trkaPathway	BioCarta	1564_at	33855_at	38726_at	38118_at	1565_s_at	38725_s_at	35701_at	1590_s_at	1082_at	790_at	791_g_at	1336_s_at	160029_at	217_at	34351_at	1217_g_at	1437_at	41721_at	33260_at	35373_at	37301_at	1269_at	32304_at	40566_at	36805_s_at	40704_at
tRNA_Synthetases	BioCarta	34849_at	34744_at	36581_at	38473_at	41241_at	40408_at	38121_at	35300_at	40827_at	34336_at	37240_at	36582_g_at	549_at	36185_at	32615_at	39342_at	40414_at	38977_at
tsp1Pathway	BioCarta	1916_s_at	40480_s_at	2039_s_at	867_s_at	1671_s_at	1915_s_at	36143_at	2094_s_at	36656_at	115_at	32583_at	40479_at	37733_at	40481_r_at
tumor_supressor	BioCarta	33848_r_at	36953_at	1989_at	1500_at	1570_f_at	38673_s_at	33896_at	38007_at	2044_s_at	39553_at	33659_at	35905_s_at	39482_at	32318_s_at	AFFX-HUMGAPDH/M33197_M_at	1912_s_at	1787_at	1814_at	1990_g_at	AFFX-HUMGAPDH/M33197_5_at	39545_at	604_at	2034_s_at	AFFX-HSAC07/X00351_5_st	AFFX-HSAC07/X00351_3_st	1571_f_at	33724_at	AFFX-HSAC07/X00351_M_st	32903_at	AFFX-HUMGAPDH/M33197_5_st	669_s_at	860_at	551_at	AFFX-HUMGAPDH/M33197_M_st	38914_at	1993_s_at	41497_at	AFFX-HSAC07/X00351_M_at	861_g_at	1957_s_at	1974_s_at	AFFX-HSAC07/X00351_5_at	1434_at	1815_g_at	1684_s_at	509_at	36182_at	AFFX-HUMGAPDH/M33197_3_at
ucalpainPathway	BioCarta	33908_at	36117_at	34499_at	120_at	32808_at	32166_at	39329_at	39330_s_at	40103_at	38448_at	2050_s_at	31737_at	37952_at	38904_at	36138_at	852_at	2055_s_at	1394_at	40864_at	1938_at	37484_at	33833_at	37309_at
vegfPathway	BioCarta	36100_at	1964_g_at	38118_at	990_at	1590_s_at	1082_at	34278_at	32659_at	36117_at	1336_s_at	663_at	1953_at	991_g_at	39368_at	1272_at	34351_at	35373_at	35934_at	40704_at	39784_at	37665_at	1545_g_at	40515_at	35701_at	403_s_at	34758_at	35968_s_at	39384_at	1154_at	1961_f_at	1039_s_at	160029_at	35967_at	34813_at	576_at	1217_g_at	1437_at	1668_s_at	36101_s_at	1963_at	40871_at	37301_at	1269_at	32304_at	40566_at	690_s_at	1567_at	1954_at
vipPathway	BioCarta	1377_at	39780_at	1082_at	41144_g_at	37863_at	36645_at	40075_at	227_g_at	39144_at	1158_s_at	1378_g_at	33567_at	38580_at	911_s_at	41768_at	34351_at	37724_at	41143_at	33009_at	1045_s_at	1461_at	281_s_at	2004_at	36215_at	41287_s_at	39143_at	37221_at	116_at	1295_at	38277_at	1973_s_at	1827_s_at	1091_at	32540_at	36359_at	32541_at	41288_at	38905_at	33770_at	38438_at	40375_at	1271_g_at	38581_at	226_at
vitcbPathway	BioCarta	36659_at	38122_at	33563_s_at	32667_at	33562_g_at	36666_at	33561_at	35493_at	39939_at	779_at	691_g_at	710_at	40507_at	39333_at	36979_at
vobesityPathway	BioCarta	32800_at	40658_r_at	1852_at	1102_s_at	405_at	36690_at	35702_at	259_s_at	41209_at	37104_at
VOXPHOS	BioCarta	39921_at	35819_at	41760_at	38777_at	36205_at	32232_at	35297_at	38080_at	38460_at	38660_at	40547_at	38395_at	35773_i_at	40872_at	38695_at	34401_at	38981_at	35751_at	32774_at	34742_at	38983_at	34400_at	40134_at	38752_r_at	40135_at	34865_at	39427_at	38060_at	39443_s_at	31842_at	31638_at	36107_at	283_at	34811_at	33695_at	40115_at	36165_at	38605_at	38693_at	32752_at	36104_at	37224_at	37029_at	33696_at	34826_at	38459_g_at	35264_at	1160_at
Wnt_Signaling	BioCarta	2090_i_at	363_at	1602_at	41851_at	1887_g_at	33684_at	1253_at	176_at	32583_at	31862_at	32891_at	37310_at	37317_at	39808_at	37724_at	41427_at	32734_at	2020_at	123_at	36799_at	1603_g_at	40873_at	40785_g_at	38431_at	1827_s_at	2030_at	1795_g_at	1983_at	2017_s_at	362_at	40777_at	36182_at	40786_at	160023_at	35433_s_at	1794_at	1708_at	1394_at	40784_at	38418_at	32304_at	1018_at	37309_at	41579_s_at	31552_at	417_at	41850_s_at	1810_s_at
wntPathway	BioCarta	36953_at	41489_at	493_at	1253_at	237_s_at	34639_at	594_s_at	1912_s_at	38300_at	40258_at	37724_at	39305_at	41308_at	34640_at	39303_at	39304_g_at	1853_at	2020_at	1973_s_at	1827_s_at	36905_at	35178_at	163_at	40184_at	33319_at	2017_s_at	35634_at	40645_at	40777_at	509_at	36949_at	36182_at	476_s_at	33181_at	510_g_at	35433_s_at	38418_at	36235_at	33831_at	37152_at	41309_g_at	38771_at
FA	Manually
Curated	40778_at	36952_at	37532_at	37016_at	35153_at	38376_at	32033_at	40082_at	31837_at	35229_at	39741_at	37523_at	35935_at	38104_at	37982_at	41648_at	40640_at	35228_at	40673_at	35435_s_at	35936_g_at	41706_at	39408_at	41530_at	38768_at	39678_at
GLUCO	Manually
Curated	856_at	41485_at	33819_at	41022_r_at	31824_at	36608_at	33703_f_at	39122_at	35517_at	837_s_at	33644_at	38000_at	34542_at	41021_s_at	38129_at	33455_at	32336_at	38130_s_at	31488_s_at	35216_at	2035_s_at	33702_f_at	39084_at	41092_at	36196_at	36495_at	40193_at	32725_at	40293_at	40107_at	37677_at	39001_at	36599_at	36026_at	32726_g_at	33820_g_at	33902_at	34430_at	37188_at
GLYCOGEN	Manually
Curated	37725_at	812_at	40876_at	37215_at	37059_at	41244_f_at	35334_at	1253_at	40057_at	39615_at	40645_at	31816_at	36241_r_at	38253_at	35518_at	38252_s_at	36480_at	40682_at	37299_at	38948_at	32643_at	32157_at	33921_at	33180_at
GLYCOL	Manually
Curated	856_at	39122_at	35517_at	40925_at	34542_at	32379_f_at	33980_at	33455_at	32336_at	31488_s_at	32378_at	34107_at	2035_s_at	39084_at	36196_at	36495_at	34108_g_at	40193_at	32725_at	40293_at	40107_at	37677_at	32210_at	36026_at	32726_g_at
GO_0005739	GO	32332_at	36739_at	41760_at	36336_s_at	41022_r_at	36923_at	31491_s_at	32167_at	673_at	34884_at	37335_at	33368_at	36636_at	34742_at	36178_at	36228_at	37523_at	33367_s_at	34291_at	37999_at	41684_at	35807_at	36164_at	36107_at	144_at	35385_at	41070_r_at	35962_at	33202_f_at	38846_at	40640_at	31836_at	39867_at	41111_at	41711_at	36561_at	31673_s_at	38368_at	38328_at	41530_at	32722_at	39678_at	31691_g_at	38459_g_at	1160_at	36337_at	33775_s_at	39800_s_at
t	1747_at	39492_at	37453_at	999_at	40673_at	35228_at	32726_g_at	35435_s_at	39041_at	41706_at	36195_at	41509_at	38768_at	35819_at	38148_at	40112_at	37593_at	37195_at	37862_at	40509_at	40764_at	40074_at	38638_at	36952_at	38080_at	38460_at	37532_at	31934_at	41021_s_at	38981_at	35751_at	1750_at	37341_at	39160_at	41120_at	37982_at	34420_at	34666_at	36163_at	33774_at	35636_at	36665_at	40115_at	37592_at	35111_at	39086_g_at	36599_at	39089_at	39436_at
GO_ROS	FO	38386_r_at	34242_at	1403_s_at	36937_s_at	33284_at	34243_i_at	41038_at	1404_r_at	39729_at	40104_at	34666_at	41324_g_at	36620_at	35807_at	39136_at	37599_at	41631_f_at	41323_at	1005_at	34244_r_at	36068_at	35723_at	770_at	399_at	1405_i_at	34363_at	39968_at	35605_at	41432_at	41776_at	34715_at	40159_r_at
human_mitoDB_6_2002	Manually
Curated	32332_at	34146_at	36364_at	41770_at	33192_g_at	36923_at	38335_at	37174_at	31884_at	37335_at	40872_at	35465_at	33191_at	32774_at	36228_at	32853_at	35721_at	41684_at	34147_g_at	31638_at	34719_at	2002_s_at	39004_at	36165_at	1653_at	41201_at	41711_at	33580_r_at	39564_s_at	37224_at	1081_at	37436_at	41530_at	36337_at	39825_at	34343_at	37741_at	32822_at	40840_at	37704_at	35760_at	40105_at	39741_at	38776_at	1468_at	40470_at	41648_at	32828_at	36830_at
at	34330_at	38979_at	38425_at	32331_at	40026_g_at	660_at	39805_at	40788_at	38997_at	38462_at	37992_s_at	37216_at	37361_at	41760_at	2060_at	32232_at	34339_at	35297_at	37674_at	31820_at	36636_at	37807_at	40134_at	34865_at	33214_at	36107_at	283_at	1997_s_at	35962_at	38846_at	31836_at	39867_at	37029_at	38368_at	31691_g_at	33775_s_at	40110_at	40467_at	33729_at	36718_s_at	38334_g_at	38376_at	910_at	40082_at	1847_s_at	36596_r_at	1615_at	36542_at	36986_at
at	38451_at	38743_f_at	36687_at	37330_at	32852_at	41681_at	32830_g_at	40111_g_at	846_s_at	35936_g_at	36475_at	35343_at	35646_at	36739_at	41022_r_at	36668_at	32167_at	673_at	35773_i_at	32221_at	33368_at	34742_at	36688_at	37523_at	38752_r_at	37999_at	40413_at	36164_at	41771_g_at	33914_r_at	35385_at	41664_at	33190_g_at	38605_at	36561_at	31673_s_at	33258_g_at	38328_at	40893_at	39678_at	38459_g_at	38742_s_at	39800_s_at	35130_at	34893_at	39027_at	34315_at	31834_r_at	37016_at
35_at	35636_at	39443_s_at	31842_at	40115_at	34340_at	37592_at	39001_at	39086_g_at	39436_at	36104_at	38330_at	32747_at	33215_g_at	33752_at	1861_at	160044_g_at	40336_at	37048_at	41206_r_at	32738_at	33195_at	1014_at	34381_at	32618_at	34002_at	32965_f_at	35971_at	33315_at	37628_at	31722_at	37098_at	36574_at	36386_at	33314_at	39408_at	38329_at	2065_s_at	33256_at	41514_s_at	41616_at	36336_s_at	37720_at	31491_s_at	38660_at	40547_at	32829_at	34884_at	34401_at	36178_at
9353_at	39492_at	37453_at	41706_at	1909_at	38565_at	41509_at	41722_at	38148_at	40509_at	38777_at	37355_at	32695_at	2066_at	38569_at	33189_at	36952_at	38080_at	38460_at	37532_at	37764_at	31934_at	40427_at	33579_i_at	1102_s_at	37341_at	41120_at	36163_at	1687_s_at	40139_at	38693_at	37659_at	34826_at	2038_g_at	38099_r_at	34764_at	37211_at	35264_at	32296_at	36632_at	683_at	36198_at	39717_g_at	31338_at	35153_at	34422_r_at	37697_s_at	32033_at	37696_at	41510_s_at
INS	Manually
Curated	31699_at	856_at	33003_at	33604_at	776_at	591_s_at	1572_s_at	39553_at	41049_at	36240_at	40636_at	37961_at	2023_g_at	33002_at	872_i_at	35517_at	32181_at	41795_at	33260_at	31982_at	40635_at	32029_at	40555_at	772_at	40972_at	36598_s_at	1975_s_at	38644_at	37221_at	1564_at	38219_at	850_r_at	33004_g_at	33162_at	794_at	1501_at	34416_at	1434_at	362_at	40137_at	322_at	34479_at	989_at	2022_at	39552_at	38737_at	851_s_at	588_at
KET	Manually
Curated	37704_at	41684_at	37211_at	41142_at	38425_at	36986_at	41682_s_at	35345_at	39678_at	41683_i_at
mitochondr	Manually
Curated	32332_at	36364_at	41770_at	33192_g_at	36923_at	37174_at	37668_at	37335_at	40872_at	35465_at	33191_at	32774_at	36228_at	32853_at	41684_at	41136_s_at	2002_s_at	39004_at	36165_at	41201_at	41711_at	37224_at	37436_at	41530_at	858_at	36337_at	39825_at	34343_at	32485_at	37741_at	32822_at	36013_at	1810_s_at	1239_s_at	36891_at	37704_at	35760_at	40105_at	31604_at	39741_at	38776_at	31871_r_at	41648_at	32828_at	36830_at	32725_at	1769_at	36690_at	38751_i_at
_at	40026_g_at	1974_s_at	40788_at	38997_at	1551_g_at	38462_at	37992_s_at	37216_at	37291_r_at	37361_at	41760_at	2060_at	32232_at	34339_at	35297_at	37674_at	36636_at	37807_at	2004_at	40134_at	34865_at	33214_at	36107_at	36667_at	283_at	1997_s_at	35962_at	38846_at	31836_at	39867_at	31323_r_at	37029_at	38368_at	35118_at	31691_g_at	33775_s_at	40110_at	40467_at	33729_at	36718_s_at	38376_at	37670_at	40082_at	1847_s_at	34582_at	33009_at	36596_r_at	1615_at	36542_at
at	37496_at	35935_at	674_g_at	38451_at	38743_f_at	36687_at	1011_s_at	37330_at	32852_at	41681_at	32830_g_at	40111_g_at	846_s_at	35936_g_at	39803_s_at	35646_at	37145_at	36739_at	41022_r_at	36668_at	32167_at	673_at	35773_i_at	32221_at	33368_at	34742_at	37523_at	38752_r_at	37999_at	40413_at	36164_at	41771_g_at	33914_r_at	35385_at	41664_at	37726_at	33190_g_at	38605_at	36561_at	31673_s_at	38328_at	39678_at	38459_g_at	38742_s_at	39800_s_at	40625_f_at	34893_at	39027_at	34315_at
135_at	35636_at	35150_at	39443_s_at	31842_at	40115_at	34340_at	37592_at	39001_at	1919_at	39086_g_at	39436_at	35367_at	35149_at	36104_at	38330_at	32747_at	1802_s_at	36417_s_at	34781_at	33215_g_at	38042_at	37450_r_at	160044_g_at	40336_at	37048_at	41206_r_at	32738_at	33195_at	1431_at	1014_at	34381_at	40379_at	33315_at	37628_at	34804_at	37098_at	34448_s_at	36386_at	33314_at	39408_at	38329_at	2065_s_at	33256_at	41514_s_at	41616_at	36336_s_at	37720_at	32031_at	31926_at
	38909_at	36609_at	36893_at	39922_at	34421_g_at	36879_at	39353_at	39492_at	37453_at	40626_at	33415_at	41706_at	1909_at	33218_at	41509_at	41722_at	38148_at	40509_at	38777_at	37355_at	32695_at	2066_at	33189_at	36952_at	38080_at	749_at	38460_at	37532_at	41865_at	31934_at	40427_at	1102_s_at	38043_at	37341_at	41120_at	912_s_at	36163_at	1687_s_at	38693_at	37659_at	34826_at	2038_g_at	34764_at	37211_at	35928_at	35264_at	32296_at	34481_at	683_at
PGC	Manually
Curated	32332_at	41542_at	33841_at	36689_at	36149_at	39826_f_at	35219_at	33843_g_at	41181_r_at	41752_at	37667_at	36997_at	AFFX-HUMGAPDH/M33197_M_st	155_s_at	40690_at	40739_at	35690_s_at	33347_at	38904_at	824_at	40500_at	39342_at	37945_at	34342_s_at	33792_at	40489_at	1138_at	41485_at	37245_at	1420_s_at	32822_at	AFFX-HUMGAPDH/M33197_M_at	36027_at	40354_at	35796_at	1915_s_at	37666_at	905_at	37364_at	39741_at	41831_at	35440_g_at	41648_at	2094_s_at	34255_at	32725_at	32210_at	35242_at	1274_s_at
t	39031_at	1456_s_at	35229_at	41324_g_at	38979_at	35349_at	33269_at	1507_s_at	39175_at	36614_at	41289_at	37763_at	32225_at	33839_at	38462_at	384_at	40078_at	36427_at	41760_at	35018_at	32232_at	35297_at	39482_at	37674_at	33882_at	33644_at	457_s_at	37189_at	34192_at	41475_at	38550_at	31488_s_at	35851_g_at	41332_at	33214_at	1130_at	1005_at	283_at	38960_at	32701_at	37677_at	39867_at	31899_at	37513_at	33878_at	37029_at	1362_s_at	AFFX-HUMTFRR/M11507_3_at	41162_at
80_s_at	36102_at	37324_at	39017_at	35849_at	36541_at	37715_at	1256_at	32047_at	33766_at	36431_at	37740_r_at	33910_at	34901_at	41371_at	39508_at	41323_at	36687_at	32852_at	36993_at	1916_s_at	32830_g_at	33820_g_at	36039_s_at	2071_s_at	40758_at	36100_at	36739_at	33911_at	32582_at	40272_at	32821_at	32554_s_at	32221_at	837_s_at	37686_s_at	651_at	33368_at	38129_at	32715_at	37523_at	41729_at	41664_at	1111_at	32574_at	33854_at	37482_at	41650_at	36028_at	33167_r_at
6511_at	643_at	35174_i_at	38981_at	35785_at	38983_at	39160_at	AFFX-HUMGAPDH/M33197_5_st	1566_at	1223_at	39443_s_at	40511_at	35714_at	35758_at	40115_at	31868_at	37592_at	36040_at	39001_at	37076_at	39436_at	AFFX-HUMGAPDH/M33197_3_st	33448_at	41180_i_at	41411_at	34006_s_at	1771_s_at	34867_at	652_g_at	33215_g_at	39779_at	38719_at	35799_at	35882_at	38098_at	34390_at	34871_at	41058_g_at	160044_g_at	AFFX-HUMGAPDH/M33197_5_at	2075_s_at	41206_r_at	37000_at	34381_at	39262_at	31536_at	31972_at	36574_at	36179_at	37505_at
t	38516_at	36922_at	36879_at	774_g_at	39353_at	40626_at	36101_s_at	41706_at	41509_at	33819_at	33714_at	36019_at	38080_at	37532_at	36183_at	34314_at	41295_at	35265_at	38051_at	40427_at	41147_at	41497_at	34541_at	36163_at	33838_at	36196_at	32955_at	33372_at	823_at	40139_at	38693_at	36518_at	41204_s_at	35012_at	34826_at	40778_at	35264_at	35371_at	41337_at	35905_s_at	41383_at	40357_at	1953_at	37321_at	1439_s_at	37351_at	37922_at	35755_at	39215_at
TCA	Manually
Curated	32332_at	40112_at	34385_at	40110_at	40467_at	36665_at	160044_g_at	32546_at	39001_at	36574_at	41314_at	40111_g_at	35751_at	36195_at	34826_at	40893_at	40470_at
shh_lisa	Manually
Curated	1200_at	36947_s_at	761_g_at	1253_at	1512_at	1833_at	760_at	36946_at	836_at	40604_at	1945_at	1730_s_at	31949_at	36215_at	34736_at	37221_at	38214_at	116_at	37729_at	1189_at	40367_at	827_s_at	531_at	40645_at	36359_at	1792_g_at	1113_at	39217_at	38905_at	35140_at	34456_s_at	33474_at	31925_s_at
XINACT	Disteche_et_al_2002	969_s_at	32572_at	34079_at	39703_at	34278_at	34643_at	970_r_at	663_at	1272_at	32554_s_at	38931_at	31557_at	34813_at	160026_at	38034_at	1268_at	35934_at	39744_at	32555_at	826_at	968_i_at	33268_at
MYC_WT	na	36415_at	35734_at	31854_at	40352_at	33752_at	35733_at	33951_at	31662_at	283_at	35779_at	36416_g_at	36414_s_at	38020_at
INSULIN_2F_DOWN	Rome_et_al_2003	38344_at	37154_at	39114_at	38871_at	37548_at	41585_at	41467_at	41238_s_at	39307_s_at	37507_i_at	1124_at	35406_at	33316_at	1262_s_at	39093_s_at	32868_at	34543_at	37506_at	32523_at	36139_at	32739_at	34309_at	36276_at	37508_f_at	32522_f_at	36781_at	34184_at	40404_s_at	37549_g_at	38343_at	1774_at	160026_at	36737_at	40612_at	39094_at	39308_r_at	1391_s_at	38950_r_at	971_s_at	35412_at	37547_at
INSULIN_2F_UP	Rome_et_al_2003	32087_at	812_at	36110_at	38110_at	36149_at	32318_s_at	37663_at	33357_at	1194_g_at	38589_i_at	31982_at	AFFX-HSAC07/X00351_3_st	34727_at	36142_at	155_s_at	35255_at	41213_at	41729_at	36167_at	946_at	38439_at	34091_s_at	39693_at	33247_at	35797_at	37709_at	39092_at	40979_at	1081_at	40576_f_at	39960_at	40543_at	40876_at	1450_g_at	39354_at	38526_at	39165_at	41221_at	34792_at	31787_at	40542_at	36627_at	359_at	38480_s_at	32226_at	38465_at	34458_at	256_s_at
674_at	40189_at	202_at	34434_at	41081_at	1499_at	41212_r_at	34850_at	1193_at	39740_g_at	38797_at	32841_at	39368_at	32336_at	39691_at	40856_at	33413_at	37628_at	34814_at	31933_r_at	35408_i_at	AFFX-HSAC07/X00351_5_at	970_r_at	40293_at	34370_at	37001_at	31687_f_at	32438_at	39337_at	39739_at	33256_at	40438_at	969_s_at	32153_s_at	31932_f_at	41760_at	40964_at	1424_s_at	38537_at	41194_at	1449_at	AFFX-HSAC07/X00351_5_st	36446_s_at	457_s_at	32248_at	37311_at	35346_at	31860_at	39733_at	36972_at
at	1640_at	40861_at	41295_at	41346_at	409_at	40198_at	1772_s_at	38982_at	40506_s_at	38542_at	40880_r_at	AFFX-HSAC07/X00351_M_st	41133_at	32572_at	38175_at	34336_at	36601_at	869_at	32814_at	40203_at	968_i_at	34891_at	39019_at	40508_at	39777_at	36211_at	915_at	36656_at	41250_at	37010_at	38966_at	38821_at	41302_at	38408_at	36791_g_at	35359_at	36585_at	40496_at	40455_at	AFFX-HSAC07/X00351_M_at	41205_at	39009_at	243_g_at	32571_at	40770_f_at	1035_g_at	38590_r_at	38031_at	34883_at
NFKB_INDUCED	Hinata_et_al_2003	1377_at	36269_at	271_s_at	34199_at	39556_at	160043_at	40458_at	1378_g_at	38241_at	32625_at	1119_at	1045_s_at	506_s_at	431_at	34736_at	33152_at	1295_at	32736_at	37025_at	35025_at	36519_at	36980_at	2002_s_at	40153_at	545_g_at	40367_at	32742_s_at	40385_at	31343_at	32818_at	41373_s_at	37460_at	41806_at	36227_at	37603_at	1896_s_at	1400_at	1042_at	259_s_at	38838_at	31859_at	34022_at	35992_at	1622_at	1732_at	38970_s_at	1593_at	32746_at
t	38488_s_at	34666_at	35803_at	38431_at	38971_r_at	35647_at	265_s_at	35735_at	40551_at	2031_s_at	38299_at	32741_at	570_at	35063_at	1405_i_at	36822_at	31719_at	34384_at	35372_r_at	1902_at	32623_at	1036_at	875_g_at	39703_at	39452_s_at	33505_at	34297_at	36645_at	38610_s_at	1372_at	2053_at	1867_at	1403_s_at	38631_at	160031_at	2075_s_at	1404_r_at	38428_at	1945_at	1868_g_at	1873_at	2050_s_at	41371_at	38125_at	1518_at	40363_r_at	1984_s_at	1852_at	35061_at
NFKB_REDUCED	Hinata_et_al_2003	41109_at	393_s_at	615_s_at	32139_at	40049_at	1546_at	33730_at	780_at	34661_at	943_at	41034_s_at	36890_at	37701_at	38162_at	32382_at	36105_at	35105_at	38143_at	1788_s_at	37176_at	37989_at	115_at	40079_at	37554_at	33693_at	867_s_at	31443_at	38163_at	37210_at	39421_at
EMT_UP	Jechlinger_et_al_2003	41839_at	39632_at	32859_at	40074_at	1731_at	37969_at	671_at	34644_at	241_g_at	39757_at	36412_s_at	37422_at	36873_at	38722_at	33391_r_at	38338_at	428_s_at	35025_at	1987_at	35464_at	34091_s_at	1988_at	32860_g_at	38653_at	32818_at	32814_at	33338_at	647_at	36157_at	201_s_at	41350_at	37068_at	1771_s_at	33167_r_at	34802_at	41654_at	1107_s_at	41745_at	32514_s_at	1319_at	41351_at	36671_at	32515_s_at	907_at	915_at	40357_at	2053_at	37351_at
EMT_DOWN	Jechlinger_et_al_2003	36638_at	262_at	35674_at	810_at	37863_at	2082_s_at	40458_at	32778_at	37021_at	287_at	36543_at	1337_s_at	41619_at	2047_s_at	36863_at	36669_at	38370_at	31502_at	32715_at	506_s_at	863_g_at	862_at	39754_at	789_at	32749_s_at	36685_at	32779_s_at	597_at	979_g_at	1680_at	1005_at	38404_at	1034_at	37693_at	973_at	115_at	40293_at	1735_g_at	1767_s_at	32225_at	755_at	867_s_at	37460_at	2058_s_at	39738_at	1035_g_at	263_g_at	34441_at
HTERT_DOWN	Smith_et_al_2003	35000_at	38493_at	38885_at	37961_at	33166_at	40670_at	38492_at	36669_at	41193_at	36876_at	1824_s_at	38787_at	567_s_at	41773_at	793_at	1729_at	40994_at	753_at	906_at	1564_at	37225_at	38773_at	1920_s_at	40881_at	36931_at	1704_at	824_at	40409_at	31343_at	39089_at	39775_at	35820_at	34281_at	37603_at	322_at	37029_at	34479_at	36605_at	39300_at	2093_s_at	34218_at	589_at	37399_at	36938_at	39058_at	461_at	38107_at	33645_at
HTERT_UP	Smith_et_al_2003	40629_at	32087_at	1377_at	36947_s_at	38016_at	39756_g_at	211_at	36930_at	32757_at	39749_at	37585_at	36086_at	39755_at	40691_at	1378_g_at	980_at	287_at	37544_at	37335_at	38129_at	39733_at	33227_at	1599_at	39785_at	41599_at	423_at	41167_at	37679_at	37050_r_at	40755_at	946_at	1005_at	1536_at	40367_at	827_s_at	32758_g_at	37327_at	1537_at	32818_at	40712_at	37295_at	36561_at	41806_at	39734_at	39342_at	831_at	37047_at	33863_at
1638_at	38431_at	37190_at	35647_at	1857_at	38727_at	37293_at	1713_s_at	34333_at	1944_f_at	36040_at	1924_at	1452_at	101_at	32626_at	33831_at	1710_s_at	515_s_at	37542_at	202_at	39123_s_at	1383_at	41615_at	31845_at	41638_at	1850_at	40426_at	36946_at	1030_s_at	1325_at	1467_at	40276_at	37048_at	36610_at	1228_s_at	35060_at	1191_s_at	40070_at	1873_at	39784_at	32962_at	40731_at	39219_at	318_at	40516_at	1154_at	39124_r_at	33228_g_at	40448_at	38438_at
ANTI_CD44_UP	Hogerkorp_et_al_2003	35975_at	37215_at	37184_at	35075_at	610_at	37005_at	39993_at	35698_at	36156_at	37175_at	38227_at	33991_g_at	40897_at	37637_at	1671_s_at	33990_at	36879_at	1303_at	36706_at	37733_at	34377_at	37578_at	35033_at	38228_g_at	35022_at	36707_s_at
ANTI_CD44_DOWN	Hogerkorp_et_al_2003	37657_at	316_g_at	1438_at	36781_at	33922_at	38402_at	38403_at	38520_r_at	39951_at	1912_s_at	36182_at	315_at	33923_s_at	37764_at	39874_at	35433_s_at	33773_at
HOXA9_DOWN	Dorsam_et_al_2004	36629_at	40949_at	1591_s_at	38110_at	35844_at	31670_s_at	32583_at	41625_at	37194_at	38069_at	36630_at	41562_at	40928_at	38188_s_at	37724_at	421_at	1071_at	1827_s_at	41766_at	41438_at	34311_at	40929_at	33837_at	40871_at	36782_s_at	38265_at	40950_at	34438_at	38266_at	2049_s_at	36656_at	41182_at	37933_at	35766_at	41617_at	32616_at	1728_at	36896_s_at	38405_at	37095_r_at	1973_s_at	1402_at	2024_s_at	203_at	31432_g_at	32786_at	41096_at	1072_g_at
HOXA9_UP	Dorsam_et_al_2004	37015_at	1475_s_at	33443_at	883_s_at	41262_at	37735_at	1519_at	1779_s_at	1640_at	1674_at	33371_s_at	1476_s_at	41263_at	37737_at	38188_s_at	38654_at	2042_s_at	36598_s_at	1969_s_at	32962_at	33317_at	32436_at	41740_at	33103_s_at	41766_at	33102_at	1473_s_at	36544_at	33207_at	41231_f_at	33372_at	1471_at	34091_s_at	38739_at	38536_at	460_at	37738_g_at	32183_at	38392_at	37736_at	34683_at	40140_at	41854_at	1694_s_at	40146_at	36570_at	1472_g_at	744_at
P53_UP	Kannan_et_al_2001	AFFX-MurFAS_at	37744_r_at	34670_at	36329_at	32562_at	287_at	38932_at	40882_at	1824_s_at	41475_at	38111_at	36326_at	34378_at	1808_s_at	979_g_at	41202_s_at	1687_s_at	41578_at	2031_s_at	36148_at	32755_at	38171_at	32716_at	41591_at	389_s_at	1243_at	35118_at	40091_at	37643_at	36491_at	37644_s_at	36634_at	31831_at	38112_g_at	31830_s_at	36073_at	1441_s_at	31682_s_at	39416_at	35183_at	37743_at	38422_s_at	41048_at	36593_at	1440_s_at	36594_s_at	1736_at	36123_at
P53_DOWN	Kannan_et_al_2001	34341_at	1717_s_at	39475_at	36708_at	33135_at	40268_at	1199_at	1536_at	37534_at	35221_at	38653_at	39847_at	41060_at	37653_at	2021_s_at	32791_at	39590_at	36234_at	41344_s_at	36839_at	41345_at	37210_at
RAP_UP	Peng_at_al_2002	32332_at	31460_f_at	41484_r_at	33844_at	33237_at	32653_at	1336_s_at	40749_at	35314_at	35132_at	39133_at	40120_at	1563_s_at	37724_at	651_at	31524_f_at	33120_at	38810_at	37929_at	37947_at	38578_at	1920_s_at	41594_at	33876_at	552_at	38397_at	38844_at	38006_at	31777_at	40779_at	31822_at	553_g_at	286_at	39039_s_at	40543_at	32607_at	39809_at	41525_at	36634_at	41166_at	34561_at	38522_s_at	40436_g_at	32746_at	37704_at	36529_at	225_at	32360_s_at
85_at	40541_at	36530_g_at	39436_at	32507_at	35014_at	35149_at	32747_at	31315_at	652_g_at	490_g_at	40091_at	36009_at	904_s_at	35810_at	41585_at	37801_at	34729_at	907_at	38858_at	33795_at	33870_at	1867_at	35071_s_at	36937_s_at	187_at	33293_at	35770_at	868_at	33732_at	33581_at	38754_at	1868_g_at	41124_r_at	40081_at	37376_at	38425_at	37584_at	40145_at	1974_s_at	163_at	31514_at	39076_s_at	404_at	1811_at	1244_at	33034_at	36347_f_at	37302_at	33582_s_at
at	32510_at	41125_r_at	33949_at	31937_at	41644_at	37731_at	37419_g_at	1935_at	36296_at	33794_g_at	1592_at	36971_at	41526_at	33804_at	489_at	33583_r_at	39318_at	31823_at	39363_at	37417_at	446_at	31459_i_at	38721_at	37735_at	37192_at	33948_at	37420_i_at	37136_at	514_at	447_g_at	36170_at	33753_at	33198_at	34408_at	34730_g_at	36653_g_at	36155_at	35916_s_at	570_at	31674_s_at	40351_at	1612_s_at	39864_at	39040_at	32814_at	36531_r_at	141_s_at	32609_at	1902_at
RAP_DOWN	Peng_at_al_2002	262_at	36369_at	32757_at	40417_at	32214_at	37507_i_at	37668_at	32240_at	40491_at	41724_at	39854_r_at	40413_at	41167_at	38087_s_at	33346_r_at	36685_at	33875_at	38729_at	36677_at	1167_s_at	41750_at	41664_at	35830_at	32758_g_at	38999_s_at	39693_at	41600_at	39357_at	33247_at	1979_s_at	39342_at	37709_at	40979_at	38804_at	34882_at	37719_at	32316_s_at	33645_at	35323_at	32563_at	40840_at	33394_at	41221_at	39406_at	36813_at	36027_at	38675_at	41216_r_at
07_at	41259_at	34791_at	1750_at	31863_at	39812_at	40396_at	430_at	40593_at	31842_at	38088_r_at	39237_at	36592_at	39086_g_at	41833_at	41785_at	38618_at	35597_at	1074_at	33516_at	36684_at	38977_at	1018_at	39024_at	36941_at	36631_at	33215_g_at	38265_at	35353_at	41380_at	33987_at	38806_at	38266_at	37889_at	31856_at	38617_at	34393_r_at	37320_at	38797_at	40587_s_at	34723_at	109_at	1191_s_at	1637_at	36985_at	35725_at	34855_at	37890_at	35293_at	32825_at
927_s_at	34811_at	38846_at	37677_at	39323_at	37513_at	35820_at	37332_r_at	38416_at	33863_at	40865_at	1160_at	35671_at	591_s_at	41823_at	AFFX-HUMTFRR/M11507_3_at	31882_at	36671_at	40110_at	37703_at	38701_at	36994_at	35839_at	1985_s_at	442_at	33393_at	31402_at	32714_s_at	39006_r_at	37683_at	33984_at	1019_g_at	39728_at	41834_g_at	32213_at	37297_at	40463_at	33781_s_at	32584_at	39353_at	1923_at	33818_at	1738_at	37379_at	36658_at	38809_s_at	40789_at	1942_s_at	40756_at	41509_at
at	35759_at	37010_at	1356_at	1306_at	37933_at	33647_s_at	33230_at	41751_at	33901_at	41510_s_at	35294_at	1312_at	41832_s_at	38473_at	36135_at	36687_at	37927_at	37330_at	32518_at	32830_g_at	40111_g_at	35407_at	263_g_at	33820_g_at	1904_at	35818_at	40758_at	38213_at
GLUT_UP	Peng_at_al_2002	36100_at	32332_at	33848_r_at	1602_at	31460_f_at	37754_at	39146_at	41097_at	33237_at	37315_f_at	32653_at	40636_at	1913_at	32043_at	41767_r_at	39133_at	40120_at	39826_f_at	40133_s_at	36630_at	32134_at	41562_at	33340_at	31927_s_at	34780_at	38360_at	38810_at	40152_r_at	36554_at	36935_at	41684_at	37929_at	38578_at	33886_at	35177_at	33103_s_at	35690_s_at	40408_at	40792_s_at	1920_s_at	38439_at	1167_s_at	41713_at	32073_at	33144_at	36611_at	32824_at	40786_at
	41442_at	35632_at	33102_at	40027_at	33273_f_at	31432_g_at	38893_at	38614_s_at	32676_at	36690_at	41261_at	39370_at	41412_at	32112_s_at	32901_s_at	31431_at	35435_s_at	38813_at	38741_at	33143_s_at	37343_at	37028_at	38029_at	818_s_at	40141_at	39925_at	40940_at	38361_g_at	31895_at	38515_at	38924_s_at	934_at	39827_at	38673_s_at	40615_at	40074_at	37900_at	40829_at	41170_at	41725_at	39227_at	32803_at	37467_at	258_at	1787_at	36185_at	40416_at	40941_at	34348_at
87_at	1496_at	2075_s_at	35311_at	34785_at	33708_at	1873_at	40151_s_at	41281_s_at	39507_at	40026_g_at	31737_at	40145_at	36553_at	163_at	37442_at	39076_s_at	404_at	41195_at	33839_at	41407_at	34367_at	40140_at	33348_at	33847_s_at	41796_at	33417_at	35143_at	756_at	37652_at	33245_at	41343_at	41747_s_at	39158_at	1293_s_at	40616_at	38666_at	37259_at	39722_at	350_at	40519_at	34396_at	40432_at	41243_at	40041_at	38854_at	37387_r_at	40465_at	35869_at	37386_i_at
7731_at	1594_at	41683_i_at	33263_at	36296_at	37849_at	1675_at	1299_at	1592_at	34179_at	41048_at	36971_at	38259_at	37316_r_at	36101_s_at	37691_at	34178_at	33017_at	38768_at	1556_at	31823_at	36629_at	39363_at	31662_at	446_at	40514_at	40513_at	36019_at	31459_i_at	33924_at	34210_at	40520_g_at	41868_at	41865_at	176_at	40730_at	32731_at	37136_at	514_at	2034_s_at	39551_at	447_g_at	36170_at	33753_at	1102_s_at	38065_at	33198_at	1212_at	35783_at	38354_at
3_at	38451_at	38473_at	33403_at	40581_at	33805_at	244_at	40827_at	33891_at	32628_at	32852_at	41235_at	41127_at	39926_at	32612_at	35277_at	34748_at	35646_at
GLUT_DOWN	Peng_at_al_2002	39598_at	262_at	40417_at	40535_i_at	38709_at	33844_at	37663_at	37507_i_at	34242_at	673_at	37357_at	37668_at	40638_at	33815_at	35682_at	40491_at	41724_at	1752_at	423_at	34736_at	39884_g_at	41167_at	33346_r_at	39510_r_at	36685_at	41213_at	41234_at	38729_at	167_at	36153_at	1167_s_at	41750_at	41824_at	38999_s_at	39693_at	41600_at	37726_at	38987_at	39357_at	37971_at	1979_s_at	33369_at	39509_at	40979_at	38804_at	39023_at	1081_at	39661_s_at
	36122_at	32553_at	39258_at	36615_at	39059_at	36974_at	39335_at	38733_at	36195_at	33782_r_at	32844_at	37938_at	35819_at	AFFX-HUMTFRR/M11507_5_at	40352_at	40332_at	38807_at	32831_at	781_at	41203_at	38808_at	32941_at	39073_at	1480_at	38911_at	39000_at	39694_at	33409_at	33758_f_at	35620_at	37506_at	34790_at	160037_at	41259_at	36499_at	34791_at	37640_at	31508_at	1750_at	38728_at	31863_at	35256_at	39812_at	430_at	229_at	35701_at	36128_at	40999_at	40799_at
t	36957_at	36985_at	35349_at	32102_at	32713_at	1314_at	38089_at	32825_at	37729_at	40788_at	39175_at	951_at	32441_at	40800_at	36614_at	41176_at	41233_at	39079_at	842_at	1551_g_at	40586_at	33314_at	41460_at	276_at	38429_at	33909_at	41415_at	32859_at	36947_s_at	39756_g_at	36489_at	37585_at	39471_at	32031_at	40536_f_at	39755_at	39155_at	38563_at	32829_at	241_g_at	39790_at	37382_at	32194_at	39056_at	39182_at	32536_at	35986_at	33433_at	41737_at
64_s_at	585_at	32816_at	35839_at	36591_at	40810_at	1985_s_at	442_at	33393_at	1031_at	1594_at	35615_at	34885_at	34848_at	34936_at	33984_at	39728_at	34758_at	34244_r_at	36189_at	32213_at	37297_at	40463_at	32543_at	33781_s_at	32584_at	39353_at	40042_r_at	33818_at	1738_at	1397_at	38094_at	39420_at	36658_at	38450_at	33791_at	40789_at	36226_r_at	35439_at	40588_r_at	36597_at	36112_r_at	40122_at	33819_at	40580_r_at	32659_at	32236_at	1512_at	749_at	33231_at
40637_at	1309_at	33135_at	37324_at	35759_at	663_at	36858_at	36946_at	1399_at	36490_s_at	1030_s_at	36223_at	1306_at	37933_at	39791_at	35853_at	33230_at	1945_at	674_g_at	41751_at	37229_at	33901_at	33339_g_at	39141_at	41403_at	1312_at	41451_s_at	36135_at	37162_at	35956_s_at	39832_at	34110_g_at	32151_at	32830_g_at	34813_at	32241_at	38031_at	41199_s_at	35407_at	263_g_at	33820_g_at	39883_at	38828_s_at	584_s_at	34358_at	35818_at	662_at	38213_at
LEU_UP	Peng_at_al_2002	32332_at	39868_at	39158_at	40668_s_at	1219_at	41095_at	1293_s_at	38666_at	33237_at	36916_at	39722_at	36113_s_at	41562_at	38501_s_at	39704_s_at	34780_at	36114_r_at	38810_at	32253_at	2059_s_at	31523_f_at	39510_r_at	41472_at	38578_at	38558_at	40408_at	38121_at	36130_f_at	38439_at	40786_at	39342_at	39130_at	34821_at	39509_at	33418_at	36795_at	39419_at	39029_at	31822_at	37115_at	34849_at	34947_at	37864_s_at	39800_s_at	40625_f_at	36634_at	41166_at	38521_at
136_at	41778_at	41126_at	40684_at	447_g_at	34682_at	33753_at	39407_at	34960_g_at	31508_at	41352_at	39929_at	37116_at	38354_at	32928_at	40785_g_at	820_at	37225_at	35916_s_at	32396_f_at	2031_s_at	36604_at	40541_at	39864_at	38138_at	39436_at	40203_at	36530_g_at	36531_r_at	35014_at	32747_at	40784_at	38977_at	37188_at	1660_at	32397_r_at	41615_at	31869_at	38753_at	38107_at	39081_at	38829_r_at	37898_r_at	36837_at	40123_at	41164_at	40676_at	35853_at	1228_s_at	35913_at
LEU_DOWN	Peng_at_al_2002	32577_s_at	262_at	40417_at	37663_at	37507_i_at	673_at	1563_s_at	33815_at	37686_s_at	40491_at	1752_at	39061_at	34736_at	39510_r_at	36685_at	981_at	41234_at	38729_at	167_at	36153_at	36677_at	1167_s_at	41750_at	36338_at	35830_at	38999_s_at	39693_at	37726_at	36209_at	33247_at	1979_s_at	32751_at	37945_at	39509_at	40979_at	38804_at	35239_at	34882_at	248_at	41485_at	37719_at	1622_at	32316_s_at	31858_at	893_at	41221_at	32171_at	1166_at
	41785_at	38618_at	35151_at	32051_at	33516_at	685_f_at	36684_at	2093_s_at	39024_at	36941_at	33215_g_at	1660_at	38806_at	39400_at	41445_at	31856_at	38617_at	34852_g_at	1943_at	1830_s_at	2075_s_at	32336_at	1014_at	1191_s_at	36985_at	34855_at	39113_at	1314_at	38089_at	32825_at	951_at	36614_at	41176_at	41233_at	39079_at	1551_g_at	33314_at	33449_at	41460_at	276_at	38429_at	33909_at	41415_at	37598_at	37318_at	36947_s_at	37585_at	32031_at	40619_at
658_at	38450_at	34323_at	33415_at	41078_at	32334_f_at	37046_at	36112_r_at	33819_at	40580_r_at	32659_at	38736_at	1512_at	749_at	37961_at	35302_at	41177_at	40198_at	39118_at	40697_at	33414_at	1550_at	36201_at	36196_at	AFFX-HUMTFRR/M11507_M_at	33932_at	33233_at	36604_at	33216_at	40846_g_at	32590_at	34479_at	1710_s_at	34891_at	40637_at	37324_at	35759_at	41728_at	1399_at	36946_at	1030_s_at	40232_at	1306_at	39103_s_at	40845_at	1945_at	674_g_at	41751_at	33901_at	37927_at
GLUCOSE_UP	Peng_at_al_2002	32332_at	41522_at	39861_at	1475_s_at	39158_at	40223_r_at	37417_at	32393_s_at	40749_at	37467_at	41803_g_at	36185_at	33409_at	35620_at	1476_s_at	619_s_at	38384_at	35728_at	38976_at	2042_s_at	41521_at	35727_at	38354_at	35478_at	820_at	40482_s_at	40408_at	38121_at	1473_s_at	1471_at	41111_at	37246_at	40484_g_at	33369_at	35820_at	40222_s_at	37884_f_at	41654_at	40576_f_at	36009_at	37188_at	1497_at	1622_at	32457_f_at	37885_at	38107_at	41166_at	33645_at
GLUCOSE_DOWN	Peng_at_al_2002	38340_at	36110_at	36975_at	41097_at	2033_s_at	41624_r_at	36916_at	33323_r_at	40149_at	571_at	35503_at	36113_s_at	32221_at	651_at	39628_at	38115_at	39510_r_at	41379_at	36167_at	41234_at	1920_s_at	37474_at	1322_at	34099_f_at	290_s_at	37971_at	38903_at	38392_at	778_s_at	39509_at	39092_at	1672_f_at	33947_at	33545_at	31534_at	37115_at	34878_at	32581_at	38688_at	40634_at	39406_at	41216_r_at	33324_s_at	36909_at	38707_r_at	32594_at	39860_at	33322_i_at
_at	40418_at	39521_at	652_g_at	2093_s_at	39024_at	36941_at	1660_at	38625_g_at	1570_f_at	41212_r_at	41144_g_at	2044_s_at	36099_at	37889_at	775_at	34393_r_at	821_s_at	34852_g_at	32687_s_at	1456_s_at	40915_r_at	1134_at	1014_at	36957_at	860_at	37890_at	33594_at	37928_at	32065_at	40611_s_at	534_s_at	401_s_at	41233_at	38594_i_at	40044_at	842_at	1703_g_at	33314_at	276_at	34394_at	2060_at	36947_s_at	34392_s_at	41139_at	34803_at	33213_g_at	33989_f_at	37769_at	32829_at
2_at	39420_at	38252_s_at	37379_at	33148_at	41078_at	871_s_at	1909_at	37046_at	36112_r_at	32659_at	33095_i_at	1512_at	38624_at	1809_at	33988_at	33850_at	35365_at	40910_at	33371_s_at	33483_at	33539_at	39118_at	38158_at	37487_at	41287_s_at	41133_at	37116_at	39180_at	37685_at	1724_at	41215_s_at	33372_at	36604_at	869_at	38253_at	2028_s_at	35900_at	39616_at	35805_at	1900_at	2038_g_at	36990_at	34651_at	35536_at	37010_at	36946_at	35899_at	1328_at	37298_at
BRCA_UP	Welcsh_et_al_2002	40806_at	32859_at	1056_s_at	41466_s_at	41474_at	1913_at	39307_s_at	41051_at	36483_at	41738_at	37909_at	1457_at	32523_at	130_s_at	37552_at	40599_at	33754_at	35783_at	41136_s_at	36484_at	1130_at	1844_s_at	39885_at	32539_at	39232_at	41354_at	41594_at	39099_at	32860_g_at	33338_at	36526_at	33535_at	41123_s_at	39023_at	41465_at	40130_at	434_at	40466_at	32777_at	844_at	32145_at	435_g_at	41739_s_at	35784_at	33113_at	38745_at	41125_r_at	37388_at
BRCA_DOWN	Welcsh_et_al_2002	35615_at	38628_at	36933_at	1973_s_at	1827_s_at	244_at	33135_at	40200_at	36137_at	40769_r_at	40359_at	2017_s_at	37998_at	32800_at	40768_s_at	1306_at	37724_at	405_at	38418_at	2020_at	32844_at
FRASOR_ER_UP	Frasor_et_al_2004	904_s_at	38875_r_at	1737_s_at	39781_at	160043_at	310_s_at	39696_at	36746_s_at	39757_at	32666_at	33371_s_at	38629_at	33799_at	1465_s_at	34898_at	32027_at	1798_at	1915_s_at	1055_g_at	41385_at	35274_at	36839_at	32084_at	39665_at	36029_at	1592_at	36454_at	40145_at	40088_at	2094_s_at	1536_at	33800_at	33372_at	33291_at	1916_s_at	114_r_at	160028_s_at	40375_at	35898_at	40078_at	38131_at	33834_at	113_i_at	31798_at
FRASOR_ER_DOWN	Frasor_et_al_2004	33352_at	37405_at	39827_at	36489_at	36933_at	37981_at	33196_at	38493_at	32598_at	1433_g_at	1114_at	37021_at	1262_s_at	41468_at	41619_at	39826_f_at	40670_at	38492_at	40432_at	36515_at	37986_at	39137_at	37821_at	266_s_at	41293_at	38944_at	1251_g_at	38545_at	39929_at	35803_at	1655_s_at	1005_at	37025_at	581_at	32527_at	1788_s_at	38960_at	41354_at	1735_g_at	37874_at	40079_at	1767_s_at	396_f_at	39366_at	892_at	32609_at	37026_at	38242_at
_at	1740_g_at	40425_at	36288_at	37024_at	1270_at	41439_at	40672_at	40671_g_at	39542_at	33218_at	37391_at	32756_at
[truncated: 53 more columns]
